# Supplementary material for: Selection of DNA aptamers for detecting metronidazole and ibuprofen: two common additives in soft drinks
Source: Royal Society of Chemistry journal article supplement (doi:10.1039/d4an01186d), 2024-01-01
Supplement: d4an01186d1.xlsx [file d4an01186d1.xlsx]

## Sheet: Figure 2B
Concentration of Metronidazole (μM)	MNZ-1		MNZ-5
	F/F0	SD	F/F0	SD
0	1	0	1	0
0.625	0.850915	0.0568407	0.912487	0.00582662
1.25	0.760998	0.0266051	0.84625	0.0165703
2.5	0.64957	0.0140496	0.813939	0.0207016
5	0.518141	0.0239171	0.73733	0.00462018
7.5	0.427032	0.00152782	0.67401	0.000593473
10	0.35882	0.0207016	0.629607	0.00668559
25	0.211979	0.0156409	0.515909	0.00169523
50	0.137748	0.00936401	0.433614	0.000972172
75	0.101241	0.00585252	0.387318	0.013673
100	0.0785033	0.00786273	0.346079	0.00583585

## Sheet: Figure 2C
Concentration of Ibuprofen (μM)	IBF-1		IBF-1a
	F/F0	SD	F/F0	SD
0	1	0	1	0
1	0.919383	0.0239236	0.973959	0.0214211
2	0.885891	0.020792	0.9489	0.00213541
5	0.814235	0.0361675	0.941268	0.0154383
10	0.762923	0.0295911	0.95305	0.0185143
20	0.723923	0.0243999	0.93274	0.011214
50	0.605776	0.00478391	0.943668	0.00542199
100	0.583459	0.0173477	0.944042	0.0192598

## Sheet: Figure 2D， E
wavelength	CD (mdeg)
	MNZ-1	MNZ-1/K+	MNZ-1/K+/MNZ	IBF-1	IBF-1/K+	IBF-1/K+/IBF
320	-0.04882	-0.32145	0.62968	0.03292	-0.1222	0.14338
319.9	-0.04804	-0.31983	0.62864	0.02522	-0.13521	0.14177
319.8	-0.04365	-0.31643	0.62841	0.01848	-0.14648	0.13947
319.7	-0.03685	-0.31135	0.62873	0.01338	-0.15613	0.13843
319.6	-0.028	-0.30556	0.6304	0.00967	-0.16361	0.13623
319.5	-0.01879	-0.29873	0.63531	0.00628	-0.1682	0.13552
319.4	-0.00878	-0.29079	0.63872	0.00456	-0.17268	0.13701
319.3	-0.00151	-0.28617	0.64036	0.0019	-0.17764	0.13913
319.2	0.00131	-0.28331	0.63949	0.00199	-0.18273	0.14268
319.1	0.00565	-0.27813	0.64043	0.00805	-0.18327	0.14995
319	0.01009	-0.26874	0.64411	0.01287	-0.17951	0.15997
318.9	0.01292	-0.25703	0.64626	0.01545	-0.17426	0.16937
318.8	0.01706	-0.2447	0.64628	0.01759	-0.16819	0.17688
318.7	0.01841	-0.23668	0.64364	0.0184	-0.16264	0.18258
318.6	0.01718	-0.22721	0.63973	0.0194	-0.157	0.18687
318.5	0.01519	-0.21738	0.63619	0.0168	-0.15259	0.19113
318.4	0.01552	-0.20704	0.63195	0.01392	-0.1496	0.19529
318.3	0.01522	-0.19771	0.62669	0.00996	-0.14979	0.1989
318.2	0.01545	-0.19054	0.62216	0.0049	-0.15272	0.20063
318.1	0.01686	-0.18423	0.61346	-0.00137	-0.15807	0.19913
318	0.01699	-0.1796	0.60461	-0.00724	-0.16234	0.19634
317.9	0.01806	-0.17472	0.6018	-0.01138	-0.16076	0.19385
317.8	0.02067	-0.16838	0.60213	-0.01297	-0.15794	0.19147
317.7	0.02199	-0.16401	0.60075	-0.01436	-0.15392	0.18911
317.6	0.02302	-0.16256	0.59629	-0.01969	-0.14994	0.18412
317.5	0.02425	-0.16114	0.59068	-0.02972	-0.14581	0.1782
317.4	0.02593	-0.15997	0.58503	-0.03829	-0.14028	0.17376
317.3	0.02711	-0.15854	0.57822	-0.04479	-0.13631	0.17096
317.2	0.02913	-0.1561	0.57524	-0.04959	-0.13058	0.17193
317.1	0.03044	-0.15555	0.57192	-0.05931	-0.12759	0.17056
317	0.03332	-0.15343	0.57236	-0.06839	-0.12369	0.16652
316.9	0.03557	-0.15285	0.57417	-0.07715	-0.12064	0.16048
316.8	0.04132	-0.15305	0.57857	-0.08391	-0.11632	0.15616
316.7	0.04932	-0.15324	0.58229	-0.08878	-0.10888	0.15567
316.6	0.05676	-0.15624	0.58485	-0.09278	-0.1031	0.15695
316.5	0.06496	-0.1579	0.58571	-0.09626	-0.09738	0.15987
316.4	0.07557	-0.15896	0.58822	-0.09919	-0.09156	0.16286
316.3	0.0887	-0.15882	0.59294	-0.09971	-0.0858	0.16612
316.2	0.09771	-0.15939	0.59633	-0.09987	-0.08318	0.16751
316.1	0.10759	-0.16032	0.59952	-0.09946	-0.0819	0.16838
316	0.1165	-0.16458	0.59748	-0.10006	-0.08163	0.16737
315.9	0.12434	-0.16761	0.59429	-0.09962	-0.08038	0.1684
315.8	0.13274	-0.16976	0.59096	-0.09902	-0.07822	0.1705
315.7	0.13756	-0.17498	0.58684	-0.10095	-0.07918	0.16879
315.6	0.13837	-0.18314	0.58138	-0.10503	-0.08452	0.16463
315.5	0.14038	-0.18987	0.57757	-0.10967	-0.08983	0.15896
315.4	0.14364	-0.19563	0.57461	-0.11164	-0.09461	0.15444
315.3	0.14327	-0.20475	0.56926	-0.11599	-0.10056	0.15047
315.2	0.14325	-0.2121	0.56376	-0.11921	-0.1051	0.1476
315.1	0.14343	-0.21827	0.55909	-0.12302	-0.10964	0.14373
315	0.14303	-0.22381	0.55213	-0.1274	-0.11623	0.14456
314.9	0.14492	-0.22694	0.54537	-0.13099	-0.11905	0.15067
314.8	0.14642	-0.23078	0.53687	-0.13379	-0.12108	0.15515
314.7	0.14569	-0.237	0.52575	-0.13733	-0.12361	0.16094
314.6	0.14183	-0.24252	0.51172	-0.14624	-0.12677	0.16448
314.5	0.13876	-0.24558	0.49899	-0.15513	-0.12835	0.1684
314.4	0.1398	-0.24402	0.48877	-0.16142	-0.12935	0.17447
314.3	0.14197	-0.24117	0.47941	-0.16583	-0.13039	0.18337
314.2	0.14656	-0.23462	0.47375	-0.16742	-0.13079	0.19373
314.1	0.1519	-0.22867	0.46757	-0.16943	-0.13059	0.20021
314	0.15989	-0.2223	0.46367	-0.16795	-0.1276	0.2055
313.9	0.17069	-0.21389	0.46468	-0.16431	-0.123	0.2145
313.8	0.18184	-0.20399	0.46783	-0.15925	-0.11439	0.22565
313.7	0.19232	-0.19298	0.47321	-0.15469	-0.10494	0.23519
313.6	0.20183	-0.18368	0.48023	-0.14988	-0.09455	0.24378
313.5	0.21184	-0.1738	0.48819	-0.14262	-0.08319	0.25347
313.4	0.21982	-0.16531	0.49492	-0.13416	-0.07077	0.26202
313.3	0.22856	-0.1557	0.50153	-0.12455	-0.05903	0.27036
313.2	0.23753	-0.14557	0.50577	-0.11366	-0.04696	0.27716
313.1	0.24323	-0.14041	0.50476	-0.10641	-0.03943	0.28277
313	0.25068	-0.13747	0.50246	-0.10054	-0.0329	0.28807
312.9	0.25864	-0.13684	0.49796	-0.09602	-0.02754	0.29053
312.8	0.26323	-0.13857	0.49553	-0.09429	-0.02523	0.28897
312.7	0.26637	-0.13979	0.49761	-0.09445	-0.02299	0.28688
312.6	0.26814	-0.1423	0.49754	-0.0954	-0.02358	0.28251
312.5	0.26865	-0.14682	0.49588	-0.09729	-0.02585	0.2762
312.4	0.26673	-0.15311	0.49246	-0.10139	-0.03232	0.26888
312.3	0.26585	-0.15647	0.49033	-0.1	-0.03741	0.26638
312.2	0.26509	-0.15981	0.48939	-0.09773	-0.03985	0.26531
312.1	0.26545	-0.16324	0.49059	-0.09709	-0.04213	0.26554
312	0.26429	-0.1667	0.48887	-0.09806	-0.04098	0.26724
311.9	0.26419	-0.17083	0.48681	-0.09608	-0.04018	0.26981
311.8	0.25933	-0.17504	0.48509	-0.09684	-0.04366	0.2686
311.7	0.25464	-0.17714	0.48857	-0.09453	-0.04204	0.26662
311.6	0.25413	-0.17522	0.49599	-0.08519	-0.03522	0.26714
311.5	0.25095	-0.17172	0.50078	-0.07585	-0.03113	0.27107
311.4	0.24619	-0.16884	0.50467	-0.06908	-0.0287	0.27173
311.3	0.23957	-0.16771	0.50856	-0.06497	-0.02692	0.27274
311.2	0.23343	-0.16626	0.50925	-0.0616	-0.02734	0.27315
311.1	0.22197	-0.16914	0.50583	-0.06248	-0.03379	0.26835
311	0.21269	-0.169	0.50648	-0.06108	-0.0379	0.26349
310.9	0.20526	-0.16833	0.50845	-0.05941	-0.04253	0.25541
310.8	0.19674	-0.1686	0.50757	-0.06151	-0.04898	0.2451
310.7	0.18998	-0.16995	0.50569	-0.06135	-0.05594	0.23523
310.6	0.18416	-0.17428	0.50442	-0.06082	-0.06413	0.22486
310.5	0.17559	-0.18119	0.50256	-0.06335	-0.07243	0.21566
310.4	0.16454	-0.18757	0.50393	-0.06821	-0.08125	0.20719
310.3	0.15682	-0.19348	0.50653	-0.07478	-0.09139	0.20207
310.2	0.15101	-0.20081	0.50871	-0.07885	-0.10282	0.19511
310.1	0.14747	-0.2065	0.51246	-0.08016	-0.11315	0.18964
310	0.14726	-0.21116	0.51825	-0.0781	-0.11969	0.1853
309.9	0.14928	-0.21389	0.52782	-0.07373	-0.12324	0.1821
309.8	0.14913	-0.21495	0.5403	-0.0681	-0.12477	0.18084
309.7	0.1489	-0.21341	0.55762	-0.06417	-0.12689	0.18104
309.6	0.15115	-0.20971	0.57453	-0.05825	-0.13019	0.18323
309.5	0.153	-0.20583	0.58965	-0.05216	-0.13317	0.18789
309.4	0.15188	-0.20421	0.60233	-0.04853	-0.13836	0.19107
309.3	0.14687	-0.20519	0.61493	-0.04481	-0.143	0.19042
309.2	0.14141	-0.20706	0.63048	-0.0377	-0.14682	0.19141
309.1	0.13685	-0.20864	0.64623	-0.02903	-0.15077	0.19386
309	0.13089	-0.20909	0.66502	-0.01853	-0.15392	0.19429
308.9	0.1247	-0.20852	0.68196	-0.00688	-0.15555	0.19239
308.8	0.11603	-0.20673	0.69468	0.00356	-0.15624	0.18779
308.7	0.1042	-0.20861	0.70226	0.00994	-0.16217	0.18416
308.6	0.09218	-0.20955	0.70931	0.01469	-0.16734	0.18294
308.5	0.08143	-0.20691	0.71758	0.01827	-0.17173	0.18161
308.4	0.07216	-0.20374	0.7246	0.0206	-0.17854	0.17818
308.3	0.0638	-0.19919	0.72944	0.02386	-0.18811	0.17308
308.2	0.05633	-0.19506	0.73304	0.02675	-0.19604	0.16625
308.1	0.05085	-0.18934	0.73566	0.03049	-0.20146	0.16311
308	0.04602	-0.18066	0.73873	0.03646	-0.20318	0.16217
307.9	0.03835	-0.17324	0.74171	0.04255	-0.20335	0.16125
307.8	0.03025	-0.16835	0.74264	0.04901	-0.20293	0.16143
307.7	0.02349	-0.16067	0.74682	0.05469	-0.2029	0.16266
307.6	0.01972	-0.15334	0.75148	0.05934	-0.20387	0.16353
307.5	0.0185	-0.1466	0.75692	0.06349	-0.20466	0.16534
307.4	0.01977	-0.13604	0.76404	0.07016	-0.20281	0.16931
307.3	0.02146	-0.1264	0.77038	0.07813	-0.20045	0.17477
307.2	0.02513	-0.11701	0.77688	0.08703	-0.19717	0.18097
307.1	0.02659	-0.10711	0.78501	0.09497	-0.19403	0.18814
307	0.03223	-0.09381	0.79728	0.10551	-0.18792	0.19845
306.9	0.03677	-0.08165	0.80875	0.11438	-0.18255	0.20851
306.8	0.04317	-0.06724	0.82019	0.12271	-0.17587	0.22467
306.7	0.04763	-0.05505	0.83178	0.12986	-0.17024	0.23921
306.6	0.05071	-0.04474	0.84253	0.13518	-0.16624	0.24659
306.5	0.05158	-0.03399	0.85511	0.14082	-0.16303	0.25189
306.4	0.05475	-0.02316	0.86938	0.14429	-0.15976	0.25522
306.3	0.05882	-0.01413	0.88252	0.14854	-0.15848	0.25837
306.2	0.06336	-0.00623	0.89892	0.15232	-0.1563	0.26153
306.1	0.06494	-0.00162	0.91266	0.15365	-0.15602	0.2612
306	0.06657	0.00473	0.92553	0.15576	-0.15238	0.26091
305.9	0.06906	0.01277	0.93739	0.15654	-0.14995	0.25946
305.8	0.07307	0.02325	0.95133	0.15854	-0.14493	0.26172
305.7	0.07505	0.03358	0.96361	0.16187	-0.14124	0.26731
305.6	0.07524	0.04321	0.97427	0.16545	-0.1366	0.27307
305.5	0.07648	0.05412	0.98343	0.16884	-0.13264	0.27741
305.4	0.08052	0.06621	0.99041	0.17091	-0.12999	0.28279
305.3	0.08467	0.08028	0.99694	0.17608	-0.12814	0.28992
305.2	0.08914	0.09503	1.00596	0.18361	-0.12543	0.29772
305.1	0.0946	0.10712	1.01427	0.19021	-0.1243	0.30814
305	0.10128	0.11752	1.01961	0.19745	-0.12363	0.32019
304.9	0.10651	0.12622	1.02493	0.20295	-0.12393	0.33241
304.8	0.11533	0.13761	1.03385	0.20933	-0.12234	0.3462
304.7	0.12684	0.15026	1.04592	0.21706	-0.11536	0.3606
304.6	0.13866	0.16379	1.06072	0.22674	-0.10696	0.37765
304.5	0.15415	0.17863	1.07421	0.23619	-0.09697	0.3957
304.4	0.17017	0.19372	1.08395	0.24741	-0.08503	0.41317
304.3	0.18413	0.20833	1.09344	0.25889	-0.07156	0.4319
304.2	0.19823	0.22366	1.10554	0.27598	-0.05549	0.45121
304.1	0.21357	0.24009	1.12038	0.29382	-0.03651	0.47139
304	0.22628	0.25525	1.13317	0.31052	-0.0168	0.48934
303.9	0.23553	0.26722	1.14424	0.32426	-0.00241	0.50721
303.8	0.24565	0.28142	1.15651	0.33995	0.00992	0.52249
303.7	0.25761	0.29542	1.16947	0.35216	0.01955	0.53625
303.6	0.26783	0.30886	1.18091	0.35937	0.02712	0.54694
303.5	0.27801	0.3218	1.19236	0.36585	0.03538	0.56094
303.4	0.28928	0.33601	1.20435	0.37259	0.04444	0.5789
303.3	0.30243	0.34999	1.21818	0.3776	0.05275	0.59935
303.2	0.31623	0.36226	1.23514	0.38052	0.06037	0.61785
303.1	0.32789	0.3704	1.25329	0.38261	0.06727	0.63415
303	0.33959	0.37702	1.27123	0.38567	0.07155	0.6499
302.9	0.3498	0.38402	1.28978	0.38939	0.07757	0.66609
302.8	0.3627	0.39666	1.31566	0.39795	0.09051	0.68662
302.7	0.37686	0.41025	1.34191	0.41074	0.1066	0.7088
302.6	0.38965	0.42209	1.36631	0.4226	0.12231	0.73201
302.5	0.40598	0.43379	1.39378	0.43438	0.13784	0.75663
302.4	0.42285	0.44773	1.42323	0.44759	0.15412	0.78232
302.3	0.44106	0.46244	1.45176	0.46111	0.1711	0.80686
302.2	0.45967	0.47683	1.47746	0.47493	0.18462	0.8279
302.1	0.48167	0.49351	1.50236	0.49303	0.19999	0.84985
302	0.50381	0.50826	1.52564	0.5132	0.21539	0.86961
301.9	0.52592	0.5223	1.54819	0.53258	0.23171	0.88915
301.8	0.54615	0.53591	1.56933	0.54835	0.24598	0.90853
301.7	0.56173	0.5489	1.58787	0.56102	0.25885	0.92651
301.6	0.57622	0.56171	1.60424	0.57206	0.27256	0.94497
301.5	0.59105	0.57364	1.6214	0.58359	0.28688	0.96463
301.4	0.60779	0.58189	1.63606	0.59568	0.3002	0.9836
301.3	0.62233	0.58763	1.64989	0.60702	0.31229	1.00204
301.2	0.63631	0.59318	1.6627	0.6149	0.32357	1.02003
301.1	0.65284	0.60113	1.6787	0.62444	0.33868	1.04225
301	0.67218	0.61245	1.69597	0.63537	0.35508	1.06714
300.9	0.69458	0.62803	1.712	0.64742	0.37329	1.09325
300.8	0.71695	0.6447	1.72715	0.65987	0.39125	1.11721
300.7	0.74129	0.66128	1.74015	0.67119	0.4073	1.14083
300.6	0.76552	0.67748	1.75091	0.68082	0.42108	1.16576
300.5	0.78947	0.69033	1.7617	0.68926	0.43593	1.19061
300.4	0.81416	0.70333	1.77353	0.7007	0.45384	1.2163
300.3	0.83958	0.71878	1.78953	0.71352	0.47195	1.24134
300.2	0.8676	0.73493	1.80927	0.72694	0.49076	1.26638
300.1	0.89749	0.75381	1.8291	0.73978	0.50985	1.29349
300	0.92553	0.77101	1.84504	0.74838	0.52829	1.31778
299.9	0.95467	0.79052	1.86341	0.75748	0.54899	1.34515
299.8	0.98329	0.80953	1.88549	0.76882	0.56675	1.37245
299.7	1.01042	0.8246	1.90653	0.77879	0.58142	1.3964
299.6	1.03945	0.83829	1.92771	0.78826	0.59273	1.41845
299.5	1.06999	0.85397	1.95041	0.80066	0.60551	1.44095
299.4	1.1003	0.87235	1.97345	0.81447	0.62096	1.46581
299.3	1.1309	0.89094	1.99625	0.8302	0.63834	1.49212
299.2	1.16192	0.91204	2.02194	0.84717	0.65497	1.51818
299.1	1.192	0.93199	2.04741	0.86253	0.67132	1.54357
299	1.22151	0.95083	2.07231	0.87595	0.68633	1.56834
298.9	1.24989	0.96987	2.09527	0.89064	0.70106	1.59258
298.8	1.28087	0.98982	2.11778	0.90722	0.7169	1.61671
298.7	1.31205	1.00825	2.13949	0.92203	0.73036	1.6373
298.6	1.34339	1.02746	2.16674	0.93765	0.74635	1.65989
298.5	1.37553	1.04639	2.19496	0.95453	0.76334	1.67934
298.4	1.40771	1.06693	2.22598	0.97437	0.78287	1.69857
298.3	1.44314	1.09233	2.25903	0.99758	0.80626	1.72424
298.2	1.48193	1.11969	2.2933	1.02348	0.82918	1.75179
298.1	1.52232	1.14937	2.32641	1.05186	0.85313	1.78285
298	1.56205	1.1815	2.36037	1.08127	0.87755	1.81536
297.9	1.60139	1.21382	2.39488	1.10948	0.90138	1.84629
297.8	1.6426	1.24642	2.43048	1.13867	0.92729	1.87959
297.7	1.68461	1.28121	2.47078	1.1692	0.95302	1.91453
297.6	1.72567	1.31332	2.50965	1.19773	0.97666	1.94958
297.5	1.76373	1.34411	2.54393	1.22447	0.99837	1.9837
297.4	1.80044	1.3725	2.577	1.25038	1.01739	2.01553
297.3	1.83857	1.40049	2.6115	1.27772	1.03791	2.04806
297.2	1.87558	1.42752	2.6469	1.30544	1.06116	2.08208
297.1	1.90981	1.45133	2.68291	1.33228	1.08427	2.11709
297	1.94222	1.47328	2.72025	1.35999	1.10655	2.14993
296.9	1.97585	1.49842	2.75712	1.38692	1.12835	2.18175
296.8	2.01176	1.52574	2.79661	1.41413	1.15236	2.21357
296.7	2.04862	1.55479	2.84166	1.44001	1.17921	2.24561
296.6	2.08822	1.58521	2.89178	1.46744	1.20721	2.28063
296.5	2.12659	1.61599	2.94099	1.49462	1.23345	2.31617
296.4	2.16252	1.64813	2.98796	1.52126	1.25697	2.35133
296.3	2.19704	1.68063	3.03214	1.54579	1.27706	2.38411
296.2	2.22996	1.7122	3.07587	1.56904	1.29648	2.41689
296.1	2.26217	1.74323	3.11939	1.59084	1.31535	2.44842
296	2.29635	1.77222	3.1599	1.6128	1.33523	2.4792
295.9	2.33079	1.80376	3.19935	1.63292	1.35607	2.51098
295.8	2.36443	1.83323	3.23565	1.65072	1.3757	2.54252
295.7	2.40199	1.86376	3.27397	1.67128	1.39795	2.57636
295.6	2.44152	1.89768	3.31683	1.69435	1.42227	2.61177
295.5	2.48397	1.93513	3.36191	1.71988	1.45211	2.65117
295.4	2.52699	1.97305	3.40612	1.74951	1.48575	2.69223
295.3	2.57235	2.01402	3.45613	1.78647	1.52482	2.73719
295.2	2.61864	2.0566	3.50823	1.82822	1.56667	2.78125
295.1	2.66794	2.09963	3.56158	1.87047	1.60816	2.82344
295	2.71711	2.13979	3.6135	1.90852	1.64753	2.86481
294.9	2.76359	2.17905	3.66367	1.94763	1.68426	2.90679
294.8	2.81143	2.22072	3.71631	1.98885	1.7221	2.95146
294.7	2.85857	2.26418	3.77074	2.03092	1.7612	2.99814
294.6	2.90556	2.30652	3.82883	2.07498	1.80232	3.04362
294.5	2.95267	2.34542	3.88031	2.11611	1.84095	3.08638
294.4	3.00033	2.38316	3.92785	2.15379	1.87836	3.12925
294.3	3.05177	2.42211	3.97888	2.19165	1.91478	3.17316
294.2	3.10204	2.46441	4.03145	2.23232	1.95374	3.21867
294.1	3.14947	2.50711	4.08121	2.27271	1.99172	3.26385
294	3.19483	2.54898	4.13233	2.31091	2.02953	3.31024
293.9	3.23847	2.59135	4.18701	2.34974	2.06782	3.35943
293.8	3.28068	2.63286	4.24407	2.38639	2.10682	3.40841
293.7	3.32279	2.67479	4.30232	2.41954	2.1465	3.45953
293.6	3.36828	2.72108	4.36462	2.45579	2.18939	3.51365
293.5	3.4151	2.76844	4.42402	2.49197	2.2325	3.56734
293.4	3.46404	2.81604	4.48337	2.53222	2.27671	3.61927
293.3	3.51279	2.86318	4.54401	2.57355	2.3186	3.67051
293.2	3.56271	2.91259	4.60556	2.61706	2.36137	3.72232
293.1	3.61385	2.96451	4.66734	2.66124	2.40402	3.77359
293	3.66666	3.01937	4.72699	2.70702	2.44644	3.82389
292.9	3.71833	3.07694	4.78732	2.75464	2.48972	3.87488
292.8	3.76818	3.13345	4.84464	2.8021	2.53069	3.92351
292.7	3.81725	3.18821	4.90306	2.85043	2.57247	3.96851
292.6	3.86623	3.24162	4.96322	2.89975	2.61146	4.01495
292.5	3.91668	3.29467	5.02593	2.95035	2.64937	4.06449
292.4	3.96501	3.34585	5.08799	2.99782	2.6855	4.1144
292.3	4.01275	3.39413	5.14862	3.04482	2.72004	4.1611
292.2	4.06118	3.44295	5.2099	3.0922	2.75243	4.20777
292.1	4.10768	3.49261	5.27192	3.13744	2.7822	4.25391
292	4.15511	3.54276	5.33032	3.17939	2.81264	4.30028
291.9	4.1992	3.59198	5.38351	3.22057	2.84253	4.34626
291.8	4.24063	3.64171	5.43575	3.26297	2.87352	4.3912
291.7	4.28321	3.69253	5.49402	3.30803	2.90575	4.43633
291.6	4.32777	3.74239	5.55546	3.35556	2.93958	4.48271
291.5	4.37147	3.78904	5.61792	3.40285	2.97469	4.53072
291.4	4.4136	3.83444	5.67727	3.44903	3.00977	4.57954
291.3	4.45643	3.88352	5.73736	3.49657	3.047	4.63063
291.2	4.49737	3.92978	5.7926	3.5411	3.08233	4.67975
291.1	4.53867	3.97406	5.84947	3.58306	3.11728	4.7266
291	4.5795	4.01972	5.90423	3.62235	3.1496	4.77255
290.9	4.61984	4.0653	5.956	3.66122	3.18387	4.81993
290.8	4.65878	4.10707	6.00597	3.698	3.21696	4.86494
290.7	4.69872	4.15067	6.05862	3.73563	3.2537	4.91119
290.6	4.73988	4.19457	6.11731	3.77481	3.2954	4.95816
290.5	4.78092	4.24079	6.17837	3.81219	3.33889	5.0072
290.4	4.81922	4.28482	6.23813	3.84828	3.38127	5.05675
290.3	4.8588	4.32703	6.29349	3.88317	3.42121	5.1053
290.2	4.8982	4.36793	6.34662	3.91685	3.4585	5.15237
290.1	4.93649	4.40898	6.40226	3.94978	3.49655	5.1993
290	4.9713	4.44674	6.4565	3.97987	3.53058	5.24283
289.9	5.00453	4.48222	6.51326	4.00934	3.56579	5.28577
289.8	5.03807	4.51689	6.57233	4.03951	3.60264	5.32839
289.7	5.07132	4.55036	6.63112	4.07046	3.63992	5.36822
289.6	5.10503	4.58332	6.68967	4.10064	3.67673	5.40554
289.5	5.13793	4.61957	6.7471	4.1319	3.71321	5.44341
289.4	5.16924	4.65497	6.80691	4.16423	3.74836	5.47899
289.3	5.19914	4.68973	6.86796	4.19643	3.78298	5.51097
289.2	5.2272	4.72263	6.92817	4.23095	3.81677	5.53943
289.1	5.25622	4.75604	6.99055	4.26539	3.85298	5.56853
289	5.28587	4.79163	7.05135	4.29947	3.88934	5.59947
288.9	5.31444	4.82684	7.11022	4.3296	3.92341	5.62623
288.8	5.34318	4.86508	7.16985	4.3602	3.95584	5.65063
288.7	5.37475	4.90707	7.23255	4.38943	3.98929	5.67697
288.6	5.40732	4.94796	7.29718	4.417	4.02255	5.70544
288.5	5.43546	4.98505	7.36018	4.44475	4.05419	5.7332
288.4	5.46462	5.02599	7.42363	4.47473	4.08436	5.75981
288.3	5.49294	5.06638	7.48445	4.50303	4.11343	5.78292
288.2	5.52117	5.10824	7.54332	4.53082	4.14283	5.80437
288.1	5.54985	5.14977	7.60282	4.56032	4.1734	5.82788
288	5.57878	5.19236	7.66354	4.59077	4.2042	5.85204
287.9	5.6095	5.23411	7.72361	4.62234	4.23458	5.87316
287.8	5.6416	5.2765	7.78398	4.65663	4.2672	5.89608
287.7	5.67448	5.32152	7.84806	4.69311	4.29849	5.92185
287.6	5.70943	5.36526	7.90995	4.72983	4.32776	5.94919
287.5	5.74623	5.41134	7.97105	4.76715	4.35688	5.97754
287.4	5.78044	5.45587	8.03134	4.80415	4.38534	6.00547
287.3	5.81557	5.4953	8.09013	4.8401	4.41302	6.03044
287.2	5.84318	5.52813	8.14408	4.86942	4.43476	6.0518
287.1	5.86754	5.5587	8.19514	4.89457	4.45275	6.06878
287	5.89127	5.58899	8.24498	4.91773	4.46922	6.08307
286.9	5.91565	5.61839	8.29483	4.9369	4.48547	6.09795
286.8	5.94188	5.64899	8.34793	4.95612	4.50152	6.11597
286.7	5.96696	5.68151	8.3991	4.97958	4.51948	6.13307
286.6	5.99221	5.71664	8.44934	5.00241	4.54084	6.1492
286.5	6.01699	5.75185	8.49695	5.02407	4.56449	6.16427
286.4	6.0451	5.78701	8.54452	5.04689	4.58863	6.18137
286.3	6.0753	5.82482	8.58822	5.07027	4.60946	6.19933
286.2	6.10558	5.85906	8.63157	5.09222	4.62707	6.21798
286.1	6.13539	5.89382	8.68062	5.11461	4.64398	6.23708
286	6.16125	5.92924	8.72853	5.13455	4.65924	6.25329
285.9	6.18624	5.9642	8.77475	5.15001	4.67316	6.26732
285.8	6.21397	5.99866	8.82047	5.16569	4.68457	6.28083
285.7	6.24391	6.03297	8.86491	5.18196	4.69589	6.29394
285.6	6.27506	6.06725	8.90692	5.20069	4.70939	6.30793
285.5	6.30429	6.09977	8.94545	5.21844	4.72138	6.32227
285.4	6.33487	6.13382	8.98535	5.24113	4.73531	6.33839
285.3	6.36194	6.16504	9.02277	5.26163	4.74732	6.35073
285.2	6.38723	6.19341	9.05914	5.28171	4.75947	6.36183
285.1	6.41187	6.22345	9.09601	5.30141	4.77274	6.37159
285	6.4374	6.25485	9.131	5.31995	4.78603	6.38321
284.9	6.46115	6.28566	9.16534	5.33571	4.79723	6.3945
284.8	6.48357	6.31405	9.19814	5.34977	4.80694	6.4039
284.7	6.50452	6.3417	9.2343	5.36211	4.81933	6.41201
284.6	6.52623	6.36857	9.26944	5.37461	4.83367	6.42349
284.5	6.55337	6.39668	9.30453	5.38856	4.84947	6.43441
284.4	6.58178	6.42437	9.34394	5.4032	4.86263	6.44568
284.3	6.61347	6.45334	9.38011	5.41753	4.87541	6.45552
284.2	6.64207	6.48091	9.41545	5.42978	4.88862	6.46274
284.1	6.66935	6.50611	9.44983	5.44189	4.89997	6.46826
284	6.69965	6.53187	9.48774	5.45457	4.91298	6.47574
283.9	6.72944	6.55891	9.52442	5.46815	4.92715	6.48464
283.8	6.76037	6.58675	9.56235	5.4848	4.94534	6.49331
283.7	6.79011	6.61269	9.60265	5.50067	4.96572	6.50218
283.6	6.81791	6.64117	9.64355	5.51853	4.98842	6.51252
283.5	6.84223	6.66677	9.68417	5.53435	5.00805	6.52235
283.4	6.86656	6.69217	9.72428	5.55047	5.0281	6.53425
283.3	6.89191	6.71774	9.76251	5.56599	5.04656	6.54514
283.2	6.9187	6.74559	9.80007	5.58285	5.06418	6.55454
283.1	6.94458	6.77436	9.83638	5.59945	5.08186	6.5634
283	6.96931	6.80035	9.87309	5.61409	5.09905	6.5736
282.9	6.99361	6.82739	9.91189	5.63039	5.1159	6.58433
282.8	7.01587	6.85486	9.94753	5.64393	5.12769	6.59077
282.7	7.03776	6.88234	9.98185	5.66007	5.13768	6.59704
282.6	7.05844	6.90794	10.0138	5.6749	5.14655	6.60079
282.5	7.08097	6.93688	10.0502	5.69211	5.15485	6.60553
282.4	7.10233	6.96603	10.0836	5.70962	5.16208	6.60831
282.3	7.12315	6.99449	10.1125	5.72346	5.16676	6.60819
282.2	7.14341	7.01788	10.1379	5.73665	5.16951	6.60713
282.1	7.16234	7.04235	10.1647	5.75283	5.17192	6.60537
282	7.17909	7.06878	10.1917	5.76838	5.17503	6.60581
281.9	7.19302	7.09292	10.2188	5.78319	5.17885	6.60465
281.8	7.20826	7.11744	10.2444	5.79895	5.18411	6.6036
281.7	7.22655	7.13993	10.2671	5.8121	5.19133	6.60298
281.6	7.24728	7.16219	10.2857	5.82279	5.19843	6.59991
281.5	7.26592	7.18166	10.2997	5.83038	5.20365	6.59637
281.4	7.28326	7.20047	10.313	5.83796	5.20534	6.59356
281.3	7.29811	7.21792	10.3265	5.8459	5.20583	6.59117
281.2	7.31432	7.2332	10.3388	5.85378	5.2055	6.58696
281.1	7.32657	7.24542	10.3448	5.85791	5.20306	6.57758
281	7.33772	7.25621	10.3478	5.86196	5.19986	6.5685
280.9	7.35181	7.26643	10.3512	5.86561	5.19939	6.56336
280.8	7.36681	7.28095	10.3559	5.86822	5.20088	6.55973
280.7	7.38162	7.29577	10.3626	5.86958	5.2039	6.55528
280.6	7.39527	7.31128	10.3709	5.87225	5.20818	6.55321
280.5	7.41111	7.32565	10.3806	5.8763	5.21379	6.55533
280.4	7.42523	7.33631	10.3859	5.88222	5.21719	6.55876
280.3	7.43777	7.34522	10.3878	5.88809	5.22248	6.5631
280.2	7.45356	7.35737	10.3941	5.89441	5.22842	6.56712
280.1	7.46927	7.36878	10.4011	5.90124	5.23461	6.57102
280	7.48178	7.375	10.4069	5.90721	5.23994	6.57349
279.9	7.49365	7.3785	10.4146	5.9122	5.24396	6.57325
279.8	7.50473	7.37901	10.4232	5.9157	5.24512	6.57122
279.7	7.51718	7.38046	10.4323	5.92144	5.24757	6.56966
279.6	7.52752	7.3791	10.4438	5.92568	5.25407	6.57039
279.5	7.53415	7.38007	10.4573	5.92991	5.26292	6.57152
279.4	7.54119	7.37863	10.4677	5.93119	5.27137	6.57296
279.3	7.54684	7.37889	10.4792	5.93132	5.28035	6.57279
279.2	7.54972	7.3795	10.4929	5.934	5.28449	6.56932
279.1	7.55431	7.38309	10.507	5.93711	5.28812	6.56603
279	7.56026	7.39006	10.5213	5.94079	5.2906	6.56626
278.9	7.56837	7.39939	10.5391	5.94853	5.29588	6.56665
278.8	7.57823	7.40583	10.5623	5.95761	5.3057	6.56809
278.7	7.58542	7.41007	10.5822	5.96136	5.31336	6.56807
278.6	7.59093	7.41191	10.6011	5.96429	5.31721	6.56807
278.5	7.59496	7.4101	10.6118	5.96456	5.3179	6.56519
278.4	7.59729	7.40593	10.6192	5.95988	5.31843	6.56041
278.3	7.59839	7.40076	10.625	5.95524	5.31667	6.5553
278.2	7.60157	7.39585	10.635	5.95097	5.31235	6.55097
278.1	7.60584	7.39313	10.6452	5.94636	5.3084	6.54568
278	7.60759	7.39058	10.6549	5.94126	5.30497	6.53651
277.9	7.60613	7.39019	10.6624	5.93714	5.30561	6.52722
277.8	7.60667	7.39111	10.6663	5.93296	5.30382	6.51732
277.7	7.60646	7.38879	10.6684	5.93064	5.30074	6.50709
277.6	7.60447	7.38495	10.6699	5.92951	5.30062	6.49535
277.5	7.59799	7.37905	10.6671	5.92757	5.30156	6.48321
277.4	7.59017	7.37035	10.6649	5.92416	5.30491	6.47043
277.3	7.58201	7.36077	10.6622	5.91672	5.30309	6.45543
277.2	7.57719	7.35436	10.659	5.91305	5.30195	6.44062
277.1	7.57287	7.34904	10.6525	5.90912	5.29943	6.42427
277	7.56872	7.34318	10.646	5.90342	5.2941	6.40725
276.9	7.56318	7.33629	10.6412	5.89431	5.2877	6.39032
276.8	7.55691	7.33046	10.6391	5.88384	5.2849	6.37554
276.7	7.54883	7.32054	10.6352	5.87162	5.28145	6.35768
276.6	7.54134	7.30934	10.6272	5.8587	5.27739	6.33785
276.5	7.53367	7.29952	10.6199	5.84542	5.27625	6.31988
276.4	7.52439	7.28927	10.6079	5.83293	5.27399	6.30358
276.3	7.51359	7.27567	10.5952	5.81881	5.26722	6.28407
276.2	7.4974	7.25782	10.5825	5.80352	5.25788	6.26135
276.1	7.47808	7.23799	10.5634	5.78463	5.24867	6.23856
276	7.45671	7.21769	10.5449	5.7674	5.24052	6.21513
275.9	7.43396	7.19519	10.5268	5.75144	5.23277	6.19328
275.8	7.41256	7.17599	10.508	5.73579	5.22818	6.17169
275.7	7.38947	7.15753	10.486	5.71916	5.2268	6.14802
275.6	7.36682	7.14131	10.4621	5.7013	5.22824	6.1266
275.5	7.34296	7.12224	10.4367	5.68132	5.22607	6.10204
275.4	7.31742	7.104	10.4096	5.66477	5.21931	6.07603
275.3	7.29505	7.0851	10.3823	5.64751	5.20844	6.05063
275.2	7.27368	7.06321	10.3571	5.6298	5.19742	6.02761
275.1	7.2517	7.04116	10.3308	5.61333	5.18426	6.00724
275	7.22557	7.01738	10.3025	5.59712	5.16948	5.98541
274.9	7.19799	6.99371	10.2729	5.57838	5.15263	5.96247
274.8	7.17189	6.97085	10.2411	5.56052	5.13641	5.93752
274.7	7.14807	6.94915	10.2105	5.54637	5.11951	5.91173
274.6	7.12519	6.9267	10.18	5.53052	5.10039	5.88433
274.5	7.10424	6.90244	10.1523	5.51445	5.08209	5.85521
274.4	7.08531	6.87677	10.1265	5.49856	5.06304	5.82448
274.3	7.0621	6.84909	10.1033	5.47885	5.04249	5.79545
274.2	7.03466	6.81752	10.0783	5.45694	5.02015	5.76713
274.1	7.00713	6.78506	10.0528	5.43311	4.99676	5.73943
274	6.97998	6.75311	10.0279	5.41058	4.9715	5.71266
273.9	6.95421	6.72396	10.0063	5.38937	4.94585	5.68645
273.8	6.92604	6.69485	9.98587	5.36496	4.9206	5.6608
273.7	6.89687	6.66315	9.96269	5.33856	4.89823	5.63328
273.6	6.86765	6.63208	9.93593	5.31135	4.87421	5.60573
273.5	6.83429	6.60059	9.90466	5.28051	4.84437	5.5772
273.4	6.79697	6.56825	9.86982	5.2501	4.81135	5.54785
273.3	6.75874	6.53447	9.83938	5.22151	4.77649	5.51779
273.2	6.72186	6.50701	9.81527	5.19888	4.74493	5.49032
273.1	6.68662	6.47877	9.79022	5.17334	4.71777	5.46187
273	6.65392	6.45359	9.76614	5.14793	4.69312	5.4356
272.9	6.61857	6.42996	9.743	5.12144	4.6688	5.41052
272.8	6.58661	6.4042	9.71973	5.09432	4.64586	5.38589
272.7	6.56008	6.38177	9.69947	5.0683	4.62621	5.36327
272.6	6.53286	6.35776	9.6763	5.03961	4.60696	5.33733
272.5	6.50601	6.33192	9.65477	5.01372	4.58712	5.31265
272.4	6.48184	6.30192	9.63088	4.9863	4.56754	5.28773
272.3	6.45652	6.26958	9.60695	4.95892	4.54597	5.25936
272.2	6.429	6.23815	9.57855	4.93298	4.52022	5.22802
272.1	6.39709	6.20817	9.54566	4.90209	4.49451	5.19369
272	6.36454	6.17672	9.51187	4.8697	4.46894	5.15704
271.9	6.3309	6.14309	9.4767	4.83886	4.44272	5.11892
271.8	6.29607	6.11083	9.44024	4.8076	4.41753	5.08234
271.7	6.26073	6.07975	9.40237	4.77458	4.39071	5.04798
271.6	6.22256	6.04818	9.36078	4.74502	4.36167	5.01657
271.5	6.17863	6.01636	9.31771	4.71667	4.33351	4.98806
271.4	6.1318	5.97986	9.27238	4.68751	4.30352	4.95783
271.3	6.08105	5.94323	9.22596	4.65901	4.27114	4.92683
271.2	6.03306	5.9072	9.17933	4.63143	4.23397	4.89739
271.1	5.98503	5.87284	9.13384	4.60503	4.19533	4.86713
271	5.93708	5.84108	9.08496	4.5804	4.15464	4.8374
270.9	5.89085	5.80442	9.03246	4.55232	4.11503	4.80989
270.8	5.84536	5.76438	8.9791	4.52531	4.07837	4.78481
270.7	5.79928	5.72103	8.92476	4.4945	4.0437	4.75504
270.6	5.75532	5.67854	8.86617	4.46055	4.01109	4.7226
270.5	5.71682	5.63951	8.80776	4.4292	3.97969	4.69375
270.4	5.67932	5.5996	8.7498	4.40084	3.94616	4.66702
270.3	5.64234	5.56328	8.6929	4.37634	3.91428	4.63994
270.2	5.60506	5.52964	8.63647	4.3527	3.88758	4.61118
270.1	5.5675	5.49629	8.57846	4.32928	3.86103	4.58224
270	5.53093	5.46024	8.52156	4.30445	3.83248	4.55357
269.9	5.49443	5.41838	8.46205	4.28068	3.80527	4.52283
269.8	5.45514	5.37494	8.40149	4.25535	3.7752	4.49241
269.7	5.4142	5.33004	8.34169	4.22782	3.74559	4.46122
269.6	5.37192	5.28125	8.28211	4.19431	3.71375	4.42555
269.5	5.32857	5.2339	8.22692	4.16417	3.68413	4.39024
269.4	5.28488	5.1879	8.17364	4.13453	3.65701	4.35469
269.3	5.2409	5.14176	8.12039	4.10095	3.62596	4.32149
269.2	5.19747	5.09513	8.06688	4.06522	3.59407	4.28708
269.1	5.15425	5.04894	8.01062	4.02778	3.56181	4.25186
269	5.11067	5.00464	7.95482	3.99113	3.53062	4.21797
268.9	5.0701	4.96229	7.89851	3.95673	3.50349	4.18785
268.8	5.02319	4.91248	7.83817	3.91765	3.47354	4.15357
268.7	4.97048	4.86147	7.77842	3.87583	3.44183	4.11823
268.6	4.91751	4.81445	7.71814	3.84115	3.41257	4.08296
268.5	4.86297	4.76567	7.65598	3.80998	3.37837	4.04803
268.4	4.80697	4.71686	7.59277	3.77835	3.34128	4.01176
268.3	4.74811	4.66973	7.52974	3.7478	3.3035	3.97495
268.2	4.68705	4.61974	7.46415	3.71357	3.26191	3.93292
268.1	4.62938	4.57007	7.40218	3.68274	3.2183	3.89128
268	4.57705	4.52638	7.34532	3.65601	3.17944	3.84936
267.9	4.52558	4.48386	7.28629	3.62856	3.13955	3.80789
267.8	4.47699	4.4437	7.22794	3.60103	3.09801	3.76814
267.7	4.43002	4.40568	7.16953	3.56943	3.05692	3.73087
267.6	4.38131	4.36442	7.10721	3.53199	3.01801	3.69289
267.5	4.33315	4.32244	7.04554	3.49406	2.97905	3.6562
267.4	4.28699	4.28209	6.98632	3.45672	2.93996	3.62412
267.3	4.24178	4.24322	6.93109	3.42119	2.89944	3.59258
267.2	4.19755	4.20257	6.87669	3.38601	2.8601	3.56335
267.1	4.15527	4.16114	6.82052	3.34944	2.81978	3.53443
267	4.11212	4.114	6.76306	3.30877	2.7794	3.5026
266.9	4.0711	4.06832	6.70432	3.27073	2.73909	3.4751
266.8	4.03092	4.02258	6.64495	3.23308	2.69775	3.44365
266.7	3.99183	3.97965	6.58893	3.19757	2.66076	3.41406
266.6	3.95199	3.93284	6.53472	3.16584	2.62431	3.38526
266.5	3.91053	3.88749	6.48185	3.13472	2.58735	3.36078
266.4	3.86531	3.84437	6.42869	3.1018	2.55004	3.33463
266.3	3.82037	3.80227	6.37661	3.06929	2.51654	3.30764
266.2	3.77377	3.75966	6.32505	3.03849	2.48368	3.28504
266.1	3.72492	3.71498	6.27137	3.00555	2.45335	3.26737
266	3.6798	3.67277	6.21956	2.97427	2.42591	3.2543
265.9	3.63811	3.63148	6.16989	2.94486	2.40011	3.23792
265.8	3.59467	3.58728	6.1197	2.91597	2.37338	3.21711
265.7	3.55074	3.54349	6.06871	2.88697	2.34763	3.19576
265.6	3.50215	3.50082	6.01571	2.85535	2.32125	3.17529
265.5	3.45509	3.45371	5.95808	2.82515	2.2925	3.15512
265.4	3.41318	3.40994	5.90157	2.79543	2.2646	3.13236
265.3	3.36951	3.3699	5.84764	2.76933	2.23618	3.11179
265.2	3.32647	3.32653	5.79352	2.74244	2.20997	3.09066
265.1	3.28937	3.28245	5.74299	2.71843	2.18132	3.06915
265	3.25615	3.2394	5.69591	2.69362	2.15424	3.04996
264.9	3.22289	3.19126	5.64556	2.66673	2.12719	3.03211
264.8	3.18131	3.14118	5.59292	2.63963	2.09626	3.01001
264.7	3.13765	3.09148	5.53925	2.61488	2.06198	2.98589
264.6	3.09539	3.03827	5.48387	2.59432	2.02707	2.96205
264.5	3.05144	2.98748	5.42509	2.57715	1.98865	2.94092
264.4	3.00097	2.93568	5.36252	2.55485	1.94791	2.91786
264.3	2.94804	2.88199	5.29928	2.53444	1.90537	2.89817
264.2	2.89528	2.82913	5.23615	2.51472	1.86527	2.87701
264.1	2.84261	2.78013	5.17495	2.49904	1.82617	2.85592
264	2.79395	2.7327	5.11311	2.48559	1.78976	2.83735
263.9	2.74617	2.68459	5.04963	2.47015	1.75323	2.81754
263.8	2.69992	2.63376	4.98841	2.45398	1.71786	2.79832
263.7	2.65393	2.58285	4.92889	2.43929	1.67956	2.77722
263.6	2.60558	2.53308	4.86945	2.42538	1.64061	2.75415
263.5	2.55535	2.48115	4.80583	2.41046	1.59981	2.73049
263.4	2.50638	2.43106	4.74396	2.39772	1.55722	2.70885
263.3	2.46509	2.38718	4.68492	2.3847	1.51765	2.69011
263.2	2.42946	2.34636	4.62481	2.36742	1.47837	2.67036
263.1	2.39402	2.30597	4.56204	2.34732	1.43821	2.64878
263	2.35864	2.26492	4.49936	2.32345	1.40037	2.62433
262.9	2.32065	2.21624	4.42933	2.29528	1.36302	2.59293
262.8	2.28347	2.16818	4.3591	2.2636	1.32827	2.55992
262.7	2.24684	2.11807	4.29225	2.22901	1.29245	2.52184
262.6	2.21212	2.07218	4.2289	2.19401	1.26244	2.47831
262.5	2.17787	2.02631	4.16246	2.15507	1.22991	2.43474
262.4	2.14004	1.98297	4.09263	2.11496	1.20004	2.39447
262.3	2.09931	1.93647	4.02617	2.07567	1.16723	2.35807
262.2	2.05474	1.88804	3.95865	2.0351	1.13129	2.32093
262.1	2.00318	1.83837	3.88938	1.99569	1.09586	2.28445
262	1.95059	1.7851	3.81676	1.95349	1.06142	2.24677
261.9	1.89287	1.72421	3.74096	1.90928	1.02585	2.21006
261.8	1.83466	1.66546	3.66705	1.86598	0.98729	2.16887
261.7	1.7753	1.60385	3.59329	1.82496	0.9463	2.12547
261.6	1.71435	1.54979	3.51662	1.78883	0.90521	2.08293
261.5	1.6509	1.49192	3.43699	1.75101	0.86676	2.04141
261.4	1.58672	1.43327	3.3524	1.71341	0.83186	2.0032
261.3	1.52363	1.37836	3.26574	1.67909	0.79805	1.96729
261.2	1.46209	1.32133	3.17795	1.64501	0.76317	1.92968
261.1	1.40231	1.26781	3.09185	1.608	0.72949	1.89023
261	1.3465	1.22003	3.00591	1.57195	0.70086	1.85132
260.9	1.29324	1.1748	2.92264	1.54299	0.676	1.81089
260.8	1.24211	1.13102	2.84335	1.51528	0.64882	1.77083
260.7	1.19092	1.08676	2.76449	1.48964	0.62111	1.72909
260.6	1.13345	1.03642	2.6859	1.45778	0.58472	1.68082
260.5	1.07466	0.98534	2.61364	1.42401	0.54675	1.63244
260.4	1.02477	0.93752	2.54456	1.39358	0.51602	1.58711
260.3	0.9751	0.88459	2.47278	1.35896	0.48475	1.54101
260.2	0.92479	0.83198	2.4017	1.31744	0.45507	1.49566
260.1	0.87518	0.77768	2.32962	1.27699	0.42927	1.45232
260	0.82473	0.72097	2.25771	1.23636	0.40121	1.4127
259.9	0.77875	0.66651	2.18649	1.20038	0.37432	1.37759
259.8	0.73247	0.6146	2.1139	1.16486	0.34494	1.34402
259.7	0.68112	0.55876	2.03441	1.12558	0.31024	1.30866
259.6	0.62086	0.49518	1.95074	1.08065	0.26954	1.27162
259.5	0.56018	0.42958	1.86632	1.03692	0.23341	1.23583
259.4	0.49932	0.36072	1.78159	0.99475	0.20092	1.2013
259.3	0.43697	0.29146	1.69742	0.95646	0.16735	1.16474
259.2	0.37642	0.21935	1.61093	0.91722	0.12972	1.12638
259.1	0.31303	0.14445	1.5264	0.8752	0.09196	1.08782
259	0.24557	0.06722	1.43894	0.83208	0.0508	1.04673
258.9	0.17909	-0.00617	1.35089	0.79483	0.01404	1.00453
258.8	0.10929	-0.07945	1.25993	0.75298	-0.02162	0.95885
258.7	0.03991	-0.14715	1.17037	0.71264	-0.0578	0.91866
258.6	-0.03005	-0.21453	1.08135	0.67241	-0.0935	0.87354
258.5	-0.10137	-0.28304	0.99028	0.62628	-0.12816	0.82441
258.4	-0.17427	-0.35261	0.9005	0.5779	-0.16169	0.77335
258.3	-0.2485	-0.41889	0.80934	0.52773	-0.19215	0.721
258.2	-0.32391	-0.48434	0.71719	0.47232	-0.22114	0.66216
258.1	-0.4006	-0.55518	0.62317	0.41349	-0.24931	0.60084
258	-0.47722	-0.62757	0.53007	0.35512	-0.27771	0.54186
257.9	-0.55201	-0.70084	0.4356	0.29679	-0.30902	0.48504
257.8	-0.62414	-0.76871	0.34398	0.24328	-0.33662	0.42941
257.7	-0.70034	-0.8348	0.24987	0.19154	-0.36657	0.37381
257.6	-0.77491	-0.90241	0.15348	0.1399	-0.40031	0.31436
257.5	-0.84473	-0.96739	0.06059	0.09287	-0.43415	0.26052
257.4	-0.91571	-1.03598	-0.03117	0.04334	-0.46715	0.20836
257.3	-0.98535	-1.10631	-0.12628	-0.00414	-0.49984	0.15214
257.2	-1.05811	-1.17533	-0.22274	-0.05124	-0.52967	0.09524
257.1	-1.13302	-1.24422	-0.31774	-0.09769	-0.5571	0.0405
257	-1.20534	-1.3154	-0.41192	-0.14678	-0.58539	-0.01296
256.9	-1.27145	-1.38495	-0.50438	-0.19083	-0.61606	-0.06723
256.8	-1.33752	-1.45189	-0.59266	-0.23416	-0.64107	-0.11933
256.7	-1.40585	-1.51658	-0.6832	-0.27812	-0.6624	-0.17049
256.6	-1.47969	-1.57959	-0.77766	-0.32203	-0.68587	-0.22426
256.5	-1.54698	-1.64026	-0.87323	-0.36554	-0.70888	-0.27559
256.4	-1.61146	-1.70091	-0.97174	-0.41253	-0.73706	-0.3269
256.3	-1.67754	-1.76285	-1.07547	-0.46415	-0.76632	-0.37984
256.2	-1.74254	-1.82366	-1.17299	-0.51655	-0.79069	-0.43321
256.1	-1.80773	-1.88412	-1.26583	-0.56807	-0.81279	-0.48375
256	-1.87186	-1.94456	-1.35745	-0.62171	-0.83867	-0.5375
255.9	-1.93866	-2.00562	-1.4494	-0.67933	-0.86626	-0.59254
255.8	-2.00914	-2.06978	-1.54151	-0.73932	-0.89846	-0.64767
255.7	-2.08248	-2.13696	-1.63157	-0.79926	-0.93177	-0.70592
255.6	-2.15728	-2.20289	-1.71595	-0.85945	-0.96156	-0.76068
255.5	-2.22716	-2.26886	-1.79731	-0.91642	-0.98997	-0.81475
255.4	-2.29907	-2.33178	-1.87955	-0.96897	-1.01585	-0.86814
255.3	-2.36814	-2.39417	-1.96308	-1.02502	-1.04381	-0.91887
255.2	-2.43657	-2.45295	-2.04692	-1.07944	-1.07072	-0.967
255.1	-2.50556	-2.51377	-2.1353	-1.13738	-1.09763	-1.0195
255	-2.57974	-2.57889	-2.22948	-1.19887	-1.12366	-1.07831
254.9	-2.65699	-2.64929	-2.32209	-1.25909	-1.14422	-1.13726
254.8	-2.73403	-2.72029	-2.4108	-1.31528	-1.16587	-1.19822
254.7	-2.81133	-2.79299	-2.50406	-1.36833	-1.1909	-1.25858
254.6	-2.88303	-2.8571	-2.59538	-1.42059	-1.21675	-1.30638
254.5	-2.95596	-2.92192	-2.68535	-1.47144	-1.24194	-1.35381
254.4	-3.03443	-2.9839	-2.77389	-1.5221	-1.26404	-1.39648
254.3	-3.11493	-3.05143	-2.8673	-1.57131	-1.28633	-1.43621
254.2	-3.19879	-3.11989	-2.96436	-1.6187	-1.31043	-1.47655
254.1	-3.28243	-3.19664	-3.05445	-1.66647	-1.33622	-1.51988
254	-3.36694	-3.27057	-3.14695	-1.71093	-1.36515	-1.56424
253.9	-3.45155	-3.3412	-3.23814	-1.75493	-1.39333	-1.60728
253.8	-3.5339	-3.4095	-3.33129	-1.80157	-1.42374	-1.65569
253.7	-3.61259	-3.47591	-3.42325	-1.84783	-1.45408	-1.70174
253.6	-3.68644	-3.53437	-3.50992	-1.89459	-1.48562	-1.74785
253.5	-3.75795	-3.58993	-3.59801	-1.93973	-1.51516	-1.79262
253.4	-3.82909	-3.64109	-3.68788	-1.98313	-1.54358	-1.8359
253.3	-3.89785	-3.69153	-3.77383	-2.02827	-1.57146	-1.8754
253.2	-3.96412	-3.73838	-3.85347	-2.07236	-1.60399	-1.91524
253.1	-4.03231	-3.78226	-3.9296	-2.11578	-1.6383	-1.95707
253	-4.10051	-3.82854	-3.99985	-2.15722	-1.67447	-2.00103
252.9	-4.16569	-3.87243	-4.0701	-2.19912	-1.70781	-2.04323
252.8	-4.22758	-3.91983	-4.14412	-2.23678	-1.73862	-2.08018
252.7	-4.2887	-3.97268	-4.21698	-2.27317	-1.76929	-2.11342
252.6	-4.34958	-4.02933	-4.2924	-2.30906	-1.80536	-2.14597
252.5	-4.41079	-4.08599	-4.36695	-2.34847	-1.83892	-2.17685
252.4	-4.46855	-4.13994	-4.44086	-2.38701	-1.87133	-2.20213
252.3	-4.52423	-4.19283	-4.51259	-2.42403	-1.90167	-2.22757
252.2	-4.57588	-4.2466	-4.58402	-2.45941	-1.92903	-2.24852
252.1	-4.6257	-4.30206	-4.65762	-2.49202	-1.95756	-2.26649
252	-4.67792	-4.35497	-4.73162	-2.52715	-1.99047	-2.28114
251.9	-4.73044	-4.40913	-4.8091	-2.56225	-2.02661	-2.2991
251.8	-4.7814	-4.46604	-4.88892	-2.59918	-2.0651	-2.32175
251.7	-4.82602	-4.52445	-4.96656	-2.63777	-2.10422	-2.34729
251.6	-4.87323	-4.58236	-5.04708	-2.67897	-2.14059	-2.37617
251.5	-4.92216	-4.64243	-5.12668	-2.71756	-2.17481	-2.40377
251.4	-4.97376	-4.70175	-5.20569	-2.75699	-2.21048	-2.43355
251.3	-5.0198	-4.75476	-5.28212	-2.7958	-2.24232	-2.46341
251.2	-5.06168	-4.80731	-5.35542	-2.83584	-2.27199	-2.49399
251.1	-5.10378	-4.85848	-5.42516	-2.87594	-2.30605	-2.52613
251	-5.14212	-4.90572	-5.49382	-2.91338	-2.34071	-2.55769
250.9	-5.178	-4.94647	-5.55684	-2.94678	-2.3728	-2.58529
250.8	-5.21007	-4.98391	-5.61943	-2.97422	-2.40479	-2.61546
250.7	-5.24188	-5.02048	-5.67989	-3.00048	-2.43471	-2.64608
250.6	-5.27601	-5.06203	-5.739	-3.03246	-2.46682	-2.67625
250.5	-5.31086	-5.10627	-5.79736	-3.06653	-2.50197	-2.70705
250.4	-5.34502	-5.15084	-5.85196	-3.10114	-2.535	-2.74005
250.3	-5.37678	-5.19752	-5.90662	-3.13639	-2.56859	-2.77484
250.2	-5.41046	-5.24178	-5.95971	-3.16562	-2.6002	-2.80929
250.1	-5.44381	-5.28435	-6.01308	-3.19476	-2.6315	-2.84683
250	-5.47461	-5.32758	-6.06538	-3.2252	-2.66726	-2.88166
249.9	-5.50255	-5.37135	-6.1161	-3.2515	-2.70146	-2.91009
249.8	-5.52775	-5.41057	-6.16168	-3.27092	-2.73775	-2.93506
249.7	-5.5504	-5.44697	-6.20614	-3.28891	-2.77631	-2.95994
249.6	-5.57453	-5.48153	-6.25046	-3.30771	-2.81253	-2.98897
249.5	-5.6039	-5.51562	-6.29875	-3.32966	-2.85273	-3.01933
249.4	-5.63374	-5.55457	-6.34546	-3.3576	-2.89202	-3.0507
249.3	-5.66765	-5.58898	-6.39053	-3.38598	-2.93093	-3.08458
249.2	-5.70505	-5.62121	-6.4386	-3.41373	-2.96803	-3.12246
249.1	-5.73997	-5.65209	-6.48818	-3.4394	-3.00405	-3.15508
249	-5.77248	-5.6768	-6.52928	-3.46348	-3.0407	-3.18109
248.9	-5.80149	-5.70205	-6.57016	-3.48863	-3.0793	-3.20319
248.8	-5.82906	-5.72549	-6.61331	-3.51667	-3.12185	-3.22984
248.7	-5.85499	-5.74883	-6.655	-3.54496	-3.16597	-3.26039
248.6	-5.88417	-5.76901	-6.69004	-3.57746	-3.20798	-3.28716
248.5	-5.91287	-5.78937	-6.72551	-3.61046	-3.24881	-3.31514
248.4	-5.94388	-5.81166	-6.76459	-3.63997	-3.29459	-3.34253
248.3	-5.97198	-5.83242	-6.8044	-3.66387	-3.33464	-3.36781
248.2	-5.9986	-5.85172	-6.84161	-3.68785	-3.37381	-3.39204
248.1	-6.02461	-5.8704	-6.87737	-3.7128	-3.40747	-3.41619
248	-6.05195	-5.88936	-6.9075	-3.73598	-3.44178	-3.44413
247.9	-6.07829	-5.90621	-6.93252	-3.75653	-3.47316	-3.46465
247.8	-6.10359	-5.91899	-6.95379	-3.77363	-3.50048	-3.48373
247.7	-6.12704	-5.9289	-6.9733	-3.78822	-3.52457	-3.49576
247.6	-6.15146	-5.93996	-6.98921	-3.79981	-3.55254	-3.50855
247.5	-6.17459	-5.94904	-6.99993	-3.8079	-3.57738	-3.52019
247.4	-6.19973	-5.96	-7.01432	-3.81999	-3.60393	-3.53196
247.3	-6.22346	-5.97317	-7.03669	-3.83223	-3.63378	-3.54495
247.2	-6.24718	-5.98457	-7.06253	-3.84886	-3.66032	-3.56265
247.1	-6.27212	-5.9929	-7.08998	-3.86861	-3.68705	-3.58296
247	-6.29633	-6.00436	-7.11541	-3.88339	-3.71276	-3.60834
246.9	-6.31606	-6.01522	-7.13905	-3.89544	-3.73397	-3.6349
246.8	-6.33001	-6.02421	-7.16308	-3.90465	-3.75296	-3.66227
246.7	-6.34164	-6.03152	-7.18706	-3.90979	-3.77332	-3.68637
246.6	-6.35786	-6.0381	-7.21272	-3.91823	-3.79842	-3.71061
246.5	-6.37027	-6.04186	-7.2347	-3.9262	-3.81801	-3.72934
246.4	-6.38081	-6.04581	-7.25042	-3.93662	-3.83311	-3.74689
246.3	-6.38772	-6.04879	-7.25831	-3.94482	-3.84839	-3.76358
246.2	-6.39543	-6.04935	-7.26468	-3.94929	-3.86748	-3.77654
246.1	-6.39989	-6.05118	-7.26717	-3.9513	-3.88823	-3.78685
246	-6.40278	-6.05069	-7.26524	-3.95002	-3.90649	-3.79511
245.9	-6.40055	-6.04648	-7.25134	-3.94699	-3.9241	-3.80213
245.8	-6.39472	-6.03485	-7.23718	-3.94263	-3.94164	-3.80807
245.7	-6.38503	-6.0205	-7.21796	-3.93454	-3.95803	-3.81543
245.6	-6.37533	-6.01331	-7.20599	-3.92911	-3.97883	-3.82607
245.5	-6.36545	-6.00311	-7.19409	-3.92126	-3.99673	-3.83317
245.4	-6.35734	-5.99178	-7.18278	-3.91453	-4.01579	-3.83797
245.3	-6.34753	-5.97976	-7.1711	-3.90499	-4.02949	-3.84532
245.2	-6.33326	-5.96973	-7.15751	-3.89466	-4.04012	-3.8491
245.1	-6.31433	-5.96031	-7.14235	-3.8843	-4.04717	-3.84932
245	-6.29206	-5.95165	-7.12693	-3.87318	-4.0509	-3.85197
244.9	-6.26728	-5.94215	-7.11427	-3.86452	-4.05096	-3.85341
244.8	-6.23945	-5.93423	-7.10382	-3.85967	-4.05163	-3.85594
244.7	-6.21246	-5.92569	-7.09548	-3.85837	-4.05157	-3.86249
244.6	-6.18425	-5.91764	-7.08576	-3.86074	-4.05386	-3.86576
244.5	-6.15857	-5.909	-7.07331	-3.86602	-4.05879	-3.87105
244.4	-6.13328	-5.90083	-7.0576	-3.87356	-4.0632	-3.87946
244.3	-6.10569	-5.8936	-7.04187	-3.88188	-4.06291	-3.88625
244.2	-6.07673	-5.88109	-7.01934	-3.8839	-4.05958	-3.89163
244.1	-6.05051	-5.86771	-6.99266	-3.88322	-4.0547	-3.9011
244	-6.02054	-5.85512	-6.96906	-3.88167	-4.05104	-3.9067
243.9	-5.98945	-5.83911	-6.94417	-3.88117	-4.0455	-3.90891
243.8	-5.96361	-5.82151	-6.92216	-3.88241	-4.03886	-3.91704
243.7	-5.94011	-5.80645	-6.9006	-3.88102	-4.03169	-3.92353
243.6	-5.91607	-5.79109	-6.87262	-3.87511	-4.02229	-3.9268
243.5	-5.89055	-5.77504	-6.84006	-3.86947	-4.01423	-3.92932
243.4	-5.87015	-5.7577	-6.81	-3.86303	-4.00562	-3.92975
243.3	-5.84831	-5.73857	-6.77349	-3.85294	-3.99836	-3.93111
243.2	-5.82612	-5.718	-6.73598	-3.84504	-3.99157	-3.93367
243.1	-5.80037	-5.69424	-6.69664	-3.84102	-3.97964	-3.93377
243	-5.77292	-5.67206	-6.65641	-3.83358	-3.96325	-3.92651
242.9	-5.74319	-5.64294	-6.61191	-3.82155	-3.94628	-3.92059
242.8	-5.71531	-5.61016	-6.56923	-3.80484	-3.92585	-3.91557
242.7	-5.68946	-5.57477	-6.52672	-3.78268	-3.9018	-3.90941
242.6	-5.66515	-5.54165	-6.48387	-3.76461	-3.8755	-3.90377
242.5	-5.63944	-5.50722	-6.43909	-3.74855	-3.84821	-3.89824
242.4	-5.61147	-5.47069	-6.39288	-3.73539	-3.82262	-3.8912
242.3	-5.58189	-5.42879	-6.34486	-3.72136	-3.79642	-3.88567
242.2	-5.55591	-5.38712	-6.29345	-3.70925	-3.77489	-3.87969
242.1	-5.53185	-5.34529	-6.24687	-3.69803	-3.7564	-3.87368
242	-5.50981	-5.30625	-6.20126	-3.68941	-3.74229	-3.86894
241.9	-5.48523	-5.26843	-6.15268	-3.68375	-3.72578	-3.86262
241.8	-5.46158	-5.22943	-6.10349	-3.6762	-3.70892	-3.85243
241.7	-5.43952	-5.18977	-6.05613	-3.66445	-3.69341	-3.84366
241.6	-5.42237	-5.15143	-6.00855	-3.65203	-3.68142	-3.83503
241.5	-5.40347	-5.11922	-5.96379	-3.64759	-3.6673	-3.83018
241.4	-5.37972	-5.08964	-5.92029	-3.64795	-3.64745	-3.82697
241.3	-5.35601	-5.05949	-5.87426	-3.64628	-3.62734	-3.81547
241.2	-5.32712	-5.02839	-5.81982	-3.64162	-3.60641	-3.7981
241.1	-5.29596	-4.99789	-5.76679	-3.63776	-3.58963	-3.78429
241	-5.26261	-4.96847	-5.7163	-3.63044	-3.5744	-3.76892
240.9	-5.2245	-4.93854	-5.66384	-3.62318	-3.56091	-3.74873
240.8	-5.18402	-4.90133	-5.6113	-3.61579	-3.54707	-3.73139
240.7	-5.14505	-4.86523	-5.56427	-3.60583	-3.53163	-3.71722
240.6	-5.1064	-4.82863	-5.51947	-3.59186	-3.51567	-3.70711
240.5	-5.06465	-4.78549	-5.46822	-3.57735	-3.4968	-3.69183
240.4	-5.02577	-4.74329	-5.41747	-3.55808	-3.47694	-3.67379
240.3	-4.98678	-4.69644	-5.36776	-3.53689	-3.45314	-3.65798
240.2	-4.95144	-4.65131	-5.31696	-3.51477	-3.42824	-3.63599
240.1	-4.91208	-4.6085	-5.26795	-3.49811	-3.4037	-3.6171
240	-4.87331	-4.56363	-5.21718	-3.48674	-3.37948	-3.60301
239.9	-4.83664	-4.51973	-5.16266	-3.47679	-3.35572	-3.58724
239.8	-4.80126	-4.47906	-5.10572	-3.46768	-3.33364	-3.57116
239.7	-4.7606	-4.43368	-5.04734	-3.45511	-3.30818	-3.54664
239.6	-4.723	-4.39297	-4.99419	-3.44357	-3.28371	-3.52191
239.5	-4.68368	-4.35436	-4.94547	-3.4327	-3.26072	-3.50104
239.4	-4.64	-4.3174	-4.89568	-3.42046	-3.23723	-3.48321
239.3	-4.5921	-4.27943	-4.84811	-3.4036	-3.21132	-3.46075
239.2	-4.54495	-4.24806	-4.80997	-3.39131	-3.19273	-3.44258
239.1	-4.49173	-4.20911	-4.76925	-3.37717	-3.17496	-3.42159
239	-4.43748	-4.16351	-4.72166	-3.36346	-3.1538	-3.404
238.9	-4.37887	-4.1122	-4.66402	-3.34338	-3.13072	-3.3846
238.8	-4.31736	-4.0633	-4.59996	-3.31729	-3.10619	-3.36103
238.7	-4.25444	-4.01387	-4.53482	-3.29005	-3.08258	-3.33448
238.6	-4.19691	-3.96695	-4.4731	-3.26954	-3.06042	-3.30531
238.5	-4.14172	-3.92607	-4.41087	-3.24909	-3.03835	-3.27673
238.4	-4.08698	-3.87784	-4.34424	-3.22428	-3.01283	-3.24573
238.3	-4.03201	-3.82996	-4.27209	-3.19247	-2.98164	-3.213
238.2	-3.98092	-3.78378	-4.20094	-3.16335	-2.95101	-3.18345
238.1	-3.9291	-3.73733	-4.12782	-3.1358	-2.92272	-3.15684
238	-3.87918	-3.69463	-4.06595	-3.11157	-2.89561	-3.14057
237.9	-3.83136	-3.65732	-4.00795	-3.08663	-2.8656	-3.13268
237.8	-3.78141	-3.61818	-3.95099	-3.06079	-2.83372	-3.12823
237.7	-3.72676	-3.58149	-3.89791	-3.03915	-2.80695	-3.12579
237.6	-3.67176	-3.54566	-3.847	-3.01959	-2.77954	-3.12129
237.5	-3.62102	-3.50804	-3.79984	-2.99939	-2.75354	-3.11329
237.4	-3.57376	-3.46963	-3.75835	-2.97878	-2.73185	-3.10511
237.3	-3.52795	-3.42913	-3.71532	-2.95856	-2.70981	-3.09091
237.2	-3.4855	-3.39235	-3.67045	-2.9403	-2.68992	-3.07308
237.1	-3.44537	-3.36035	-3.629	-2.92343	-2.67756	-3.05727
237	-3.4054	-3.32556	-3.58039	-2.90432	-2.66307	-3.03447
236.9	-3.37225	-3.28882	-3.53259	-2.88788	-2.65339	-3.01485
236.8	-3.33715	-3.24808	-3.48039	-2.8688	-2.63666	-2.99435
236.7	-3.30326	-3.20473	-3.4239	-2.84815	-2.6202	-2.97344
236.6	-3.26885	-3.16083	-3.36874	-2.82751	-2.60641	-2.94984
236.5	-3.2386	-3.12301	-3.31265	-2.80728	-2.59224	-2.92611
236.4	-3.20406	-3.08405	-3.25314	-2.78152	-2.57566	-2.89962
236.3	-3.16493	-3.04061	-3.19321	-2.75141	-2.55877	-2.87488
236.2	-3.12153	-2.99341	-3.13597	-2.7191	-2.54005	-2.84687
236.1	-3.0797	-2.9471	-3.08282	-2.68643	-2.52174	-2.82396
236	-3.04384	-2.90254	-3.03089	-2.65837	-2.50751	-2.80571
235.9	-3.00909	-2.86078	-2.98099	-2.63256	-2.4983	-2.7876
235.8	-2.97363	-2.8158	-2.92932	-2.60793	-2.49058	-2.76568
235.7	-2.94086	-2.77153	-2.87434	-2.58716	-2.48189	-2.74749
235.6	-2.91281	-2.73115	-2.8175	-2.56715	-2.47324	-2.73527
235.5	-2.88597	-2.69043	-2.75925	-2.542	-2.46818	-2.71872
235.4	-2.84972	-2.64518	-2.69641	-2.51801	-2.45845	-2.70081
235.3	-2.8099	-2.59848	-2.64163	-2.49264	-2.44739	-2.68355
235.2	-2.77052	-2.54813	-2.58539	-2.46299	-2.43273	-2.66605
235.1	-2.7292	-2.4957	-2.53237	-2.42825	-2.41665	-2.65234
235	-2.68362	-2.44057	-2.48302	-2.39483	-2.40431	-2.63213
234.9	-2.64526	-2.38901	-2.43491	-2.3622	-2.39597	-2.61533
234.8	-2.60314	-2.33827	-2.38528	-2.32796	-2.3859	-2.59741
234.7	-2.5651	-2.28877	-2.33662	-2.30009	-2.37681	-2.58469
234.6	-2.52899	-2.24219	-2.29054	-2.2777	-2.36675	-2.57231
234.5	-2.49066	-2.19766	-2.23681	-2.25522	-2.34886	-2.55268
234.4	-2.45108	-2.15805	-2.18431	-2.23633	-2.33617	-2.53658
234.3	-2.40987	-2.11627	-2.1327	-2.21116	-2.3293	-2.51814
234.2	-2.37097	-2.07531	-2.0801	-2.1852	-2.32269	-2.49094
234.1	-2.33966	-2.03969	-2.03303	-2.15986	-2.32091	-2.45941
234	-2.30914	-2.00378	-1.98712	-2.13209	-2.31748	-2.42664
233.9	-2.27859	-1.96286	-1.94776	-2.09992	-2.30739	-2.39166
233.8	-2.24129	-1.91873	-1.90795	-2.06387	-2.28853	-2.35597
233.7	-2.2002	-1.86905	-1.86683	-2.02166	-2.26253	-2.30996
233.6	-2.15792	-1.81395	-1.82171	-1.97887	-2.23747	-2.26553
233.5	-2.10988	-1.75894	-1.77484	-1.93481	-2.21281	-2.2156
233.4	-2.06022	-1.70339	-1.72829	-1.88995	-2.18036	-2.16728
233.3	-2.01024	-1.64649	-1.68052	-1.85294	-2.14511	-2.12714
233.2	-1.95736	-1.58754	-1.63223	-1.81009	-2.10563	-2.08435
233.1	-1.90329	-1.51867	-1.58205	-1.76262	-2.06965	-2.04172
233	-1.84927	-1.44935	-1.53447	-1.71256	-2.04102	-2.00423
232.9	-1.79748	-1.38204	-1.49521	-1.66289	-2.00921	-1.97032
232.8	-1.75143	-1.31401	-1.45747	-1.60614	-1.96858	-1.93442
232.7	-1.70075	-1.24336	-1.41699	-1.5461	-1.92442	-1.88946
232.6	-1.65504	-1.17539	-1.36979	-1.48833	-1.8741	-1.84571
232.5	-1.61112	-1.11577	-1.32452	-1.43578	-1.82488	-1.80067
232.4	-1.56899	-1.05626	-1.28282	-1.39001	-1.78175	-1.76315
232.3	-1.53075	-1.00197	-1.23804	-1.34488	-1.73726	-1.73059
232.2	-1.49188	-0.95462	-1.19253	-1.30031	-1.69173	-1.70095
232.1	-1.44827	-0.91069	-1.14775	-1.25355	-1.64331	-1.67568
232	-1.39868	-0.86849	-1.10511	-1.20638	-1.59116	-1.65285
231.9	-1.35324	-0.83101	-1.07082	-1.16211	-1.54538	-1.63838
231.8	-1.3116	-0.79242	-1.02968	-1.1218	-1.49864	-1.62658
231.7	-1.26734	-0.75049	-0.98033	-1.07507	-1.44672	-1.60923
231.6	-1.22325	-0.70772	-0.93044	-1.02691	-1.39751	-1.58336
231.5	-1.18147	-0.66342	-0.88146	-0.97654	-1.35103	-1.55702
231.4	-1.14224	-0.62263	-0.83685	-0.92573	-1.30834	-1.53291
231.3	-1.1007	-0.58212	-0.78682	-0.87942	-1.26839	-1.5034
231.2	-1.05443	-0.54018	-0.73618	-0.83396	-1.23114	-1.47292
231.1	-1.01294	-0.50393	-0.68692	-0.783	-1.19765	-1.43566
231	-0.97276	-0.46685	-0.63774	-0.73846	-1.17069	-1.3963
230.9	-0.93216	-0.42205	-0.58858	-0.69736	-1.13706	-1.35817
230.8	-0.89198	-0.3825	-0.53359	-0.65334	-1.09721	-1.31744
230.7	-0.85645	-0.34554	-0.47938	-0.6079	-1.05633	-1.27038
230.6	-0.82193	-0.30555	-0.42852	-0.56333	-1.01944	-1.21619
230.5	-0.78801	-0.27031	-0.38079	-0.5177	-0.98838	-1.16303
230.4	-0.75715	-0.23194	-0.33915	-0.47354	-0.9515	-1.10424
230.3	-0.7215	-0.19451	-0.29889	-0.42396	-0.91108	-1.04279
230.2	-0.68873	-0.16207	-0.26398	-0.38433	-0.87067	-0.98576
230.1	-0.65711	-0.13493	-0.22464	-0.34754	-0.83225	-0.92308
230	-0.62303	-0.10888	-0.18207	-0.31675	-0.79586	-0.86879
229.9	-0.57849	-0.07855	-0.14051	-0.28835	-0.75928	-0.81188
229.8	-0.53159	-0.04031	-0.10454	-0.25851	-0.72689	-0.75512
229.7	-0.48977	-0.00231	-0.0723	-0.23531	-0.69626	-0.69927
229.6	-0.44924	0.04744	-0.03506	-0.20654	-0.66756	-0.63687
229.5	-0.40973	0.09861	-0.00741	-0.1816	-0.64322	-0.56969
229.4	-0.37268	0.14418	0.021	-0.15389	-0.61646	-0.50126
229.3	-0.34261	0.1923	0.0575	-0.12494	-0.58645	-0.42388
229.2	-0.3043	0.23593	0.09701	-0.09492	-0.55609	-0.35311
229.1	-0.26656	0.27377	0.13733	-0.07446	-0.52778	-0.29684
229	-0.22591	0.30552	0.17904	-0.0539	-0.49579	-0.24088
228.9	-0.17684	0.34474	0.23339	-0.02952	-0.44479	-0.18135
228.8	-0.11598	0.39217	0.29565	-0.0015	-0.38712	-0.11982
228.7	-0.05009	0.44441	0.35585	0.03354	-0.32516	-0.05177
228.6	0.01616	0.48431	0.41431	0.07188	-0.25969	0.01444
228.5	0.08062	0.52002	0.4722	0.10634	-0.19638	0.07926
228.4	0.14208	0.55288	0.52904	0.13197	-0.13283	0.14022
228.3	0.1978	0.58015	0.58453	0.15339	-0.06569	0.19284
228.2	0.25177	0.60808	0.63872	0.17529	-0.00499	0.2351
228.1	0.31102	0.64015	0.68379	0.19634	0.04449	0.27428
228	0.36316	0.66648	0.72447	0.21394	0.08396	0.31712
227.9	0.41174	0.67834	0.76153	0.22871	0.12231	0.35923
227.8	0.45454	0.68309	0.79915	0.23347	0.15666	0.40068
227.7	0.49731	0.70193	0.83042	0.24436	0.19162	0.43279
227.6	0.53571	0.72978	0.859	0.25626	0.22195	0.46663
227.5	0.5678	0.75459	0.89227	0.26665	0.25311	0.49763
227.4	0.59692	0.76745	0.92203	0.27341	0.27829	0.52116
227.3	0.62661	0.79341	0.95268	0.28425	0.30283	0.54914
227.2	0.65562	0.8274	0.98304	0.2953	0.34198	0.57613
227.1	0.67513	0.86231	1.01053	0.31044	0.38297	0.59797
227	0.69507	0.9057	1.04119	0.3277	0.4292	0.62162
226.9	0.71077	0.95275	1.07053	0.34205	0.47581	0.65214
226.8	0.73243	1.00029	1.10405	0.3548	0.52384	0.67867
226.7	0.74647	1.04335	1.14731	0.36759	0.56927	0.69844
226.6	0.76859	1.08593	1.18765	0.37531	0.61718	0.71554
226.5	0.79298	1.12646	1.23127	0.39736	0.66848	0.72712
226.4	0.81058	1.16512	1.27496	0.4317	0.71658	0.74172
226.3	0.83002	1.20907	1.31632	0.46986	0.75483	0.76408
226.2	0.84611	1.25609	1.35693	0.50812	0.79404	0.78146
226.1	0.86681	1.30865	1.39314	0.55025	0.83138	0.81003
226	0.89282	1.36271	1.42785	0.59554	0.87676	0.84615
225.9	0.92915	1.41461	1.46496	0.64098	0.91625	0.88351
225.8	0.97432	1.46313	1.51169	0.6932	0.95407	0.90651
225.7	1.01977	1.51428	1.55946	0.74414	0.99179	0.92452
225.6	1.06713	1.56078	1.60606	0.78784	1.02263	0.94236
225.5	1.10995	1.59656	1.66341	0.83293	1.05269	0.96686
225.4	1.14288	1.62419	1.71286	0.87739	1.06903	0.99375
225.3	1.17544	1.64688	1.75921	0.91726	1.08194	1.00525
225.2	1.2053	1.66869	1.79782	0.95649	1.09543	1.02692
225.1	1.22296	1.68413	1.84006	0.98843	1.11071	1.05406
225	1.24834	1.70186	1.88683	1.0139	1.12783	1.08525
224.9	1.28157	1.72686	1.93159	1.03919	1.14155	1.1277
224.8	1.31867	1.7546	1.97553	1.05948	1.15741	1.18256
224.7	1.35843	1.77473	2.01207	1.07443	1.18123	1.24232
224.6	1.39469	1.79158	2.04767	1.07795	1.21149	1.30175
224.5	1.43512	1.81352	2.08371	1.08411	1.2322	1.36319
224.4	1.47589	1.83133	2.11921	1.0872	1.24001	1.41322
224.3	1.51264	1.84173	2.14769	1.0828	1.24406	1.47095
224.2	1.55194	1.85548	2.18423	1.08609	1.24352	1.51698
224.1	1.59884	1.87944	2.23366	1.10104	1.25449	1.56071
224	1.65123	1.90386	2.2907	1.11996	1.26589	1.61178
223.9	1.69942	1.93416	2.35126	1.14581	1.28627	1.63012
223.8	1.74327	1.96616	2.41279	1.17307	1.30487	1.64871
223.7	1.77731	2.00356	2.47354	1.20303	1.31925	1.67108
223.6	1.80363	2.04284	2.54042	1.23343	1.34322	1.70862
223.5	1.84297	2.09035	2.60574	1.26268	1.36916	1.74787
223.4	1.87173	2.14105	2.65664	1.29218	1.39424	1.81531
223.3	1.8846	2.1798	2.70003	1.32494	1.40167	1.90166
223.2	1.90396	2.21216	2.73765	1.36378	1.40237	1.9732
223.1	1.9218	2.23957	2.78478	1.39791	1.4105	2.055
223	1.95133	2.25911	2.82654	1.43328	1.42527	2.11648
222.9	1.98864	2.28584	2.8733	1.47723	1.44701	2.18849
222.8	2.02559	2.31905	2.91877	1.51637	1.46981	2.25073
222.7	2.06627	2.33499	2.96023	1.54854	1.49365	2.29581
222.6	2.10288	2.34472	3.00649	1.58946	1.52026	2.34157
222.5	2.12606	2.34543	3.04522	1.62569	1.53565	2.38055
222.4	2.15319	2.35396	3.07507	1.66102	1.54708	2.43406
222.3	2.18568	2.36804	3.11739	1.69742	1.5673	2.47507
222.2	2.209	2.37702	3.14908	1.7204	1.58971	2.50584
222.1	2.23498	2.38488	3.181	1.73636	1.6025	2.5285
222	2.25923	2.38928	3.20568	1.74528	1.59369	2.52384
221.9	2.2981	2.41222	3.22851	1.7618	1.59477	2.50803
221.8	2.33908	2.43728	3.24253	1.77239	1.60655	2.48975
221.7	2.36725	2.44223	3.24482	1.77285	1.61499	2.44977
221.6	2.37783	2.42413	3.24538	1.77803	1.61241	2.4113
221.5	2.40547	2.42281	3.25636	1.79084	1.62567	2.39387
221.4	2.44822	2.42775	3.26008	1.82775	1.63735	2.38912
221.3	2.4849	2.42379	3.26606	1.85306	1.63767	2.40448
221.2	2.50874	2.42612	3.30332	1.86229	1.64516	2.41589
221.1	2.52099	2.44401	3.36056	1.85605	1.66384	2.40833
221	2.55181	2.45677	3.41033	1.84992	1.66225	2.4012
220.9	2.58676	2.45367	3.465	1.85325	1.65525	2.39057
220.8	2.61269	2.4416	3.5263	1.88321	1.66262	2.38856
220.7	2.65217	2.43465	3.58276	1.9331	1.68139	2.39652
220.6	2.68462	2.42485	3.62098	1.96138	1.66494	2.39743
220.5	2.72589	2.41603	3.64951	1.96623	1.63822	2.3867
220.4	2.76577	2.41238	3.67575	1.95625	1.62194	2.38369
220.3	2.76803	2.41124	3.67079	1.93272	1.58992	2.36735
220.2	2.7712	2.40633	3.65995	1.91647	1.54388	2.35437
220.1	2.78405	2.42607	3.65195	1.93541	1.50855	2.34923
220	2.80886	2.46226	3.63969	1.97558	1.48546	2.32285
##### Extended Information
[Comments]
Sample name	MNZ
Comment
User	WX
Division
Company	University of Waterloo
[Detailed Information]
Creation date	7/11/2024 3:01 PM
Data array type	Linear data array * 3
Horizontal axis	Wavelength [nm]
Vertical axis(1)	CD [mdeg]
Vertical axis(2)	HT [V]
Vertical axis(3)	Abs
Start	320 nm
End	220 nm
Data interval	0.1 nm
Data points	1001
[Measurement Information]
Instrument name	J-815
Model name	J-815		MNZ +K
Serial No.	A002961168
			WX
Measurement date	7/11/2024 3:01 PM
			University of Waterloo
Photometric mode	CD
Measure range	320 - 220 nm
Data pitch	0.1 nm		7/11/2024 3:03 PM
Sensitivity	Standard
D.I.T.	1 sec		Linear data array * 3
Bandwidth	2.00 nm		Wavelength [nm]
Start mode	Immediately		CD [mdeg]
Scanning speed	500 nm/min		HT [V]
Baseline correction	Baseline		Abs
Shutter control	Manual		320 nm
CD detector	PMT		220 nm
PMT voltage	Auto		0.1 nm
			1001
Concentration	5 (w/v)%
Solvent	PBS
			J-815
			J-815
			A002961168
			7/11/2024 3:03 PM
			CD
			320 - 220 nm
			0.1 nm
			Standard
			1 sec
			2.00 nm
			Immediately
			500 nm/min
			Baseline
			Manual
			PMT
			Auto
			5 (w/v)%
			PBS

## Sheet: Figure 3A
Time (s)	μcal/sec		Molar Ratio	kcal/mole of injectant
0.0333333	0.00729		0.3621	-9.56268
0.0666667	0.00796		0.70938	-7.64563
0.1	0.01018		1.05902	-5.66411
0.133333	0.01049		1.41102	-4.48357
0.166667	0.00972		1.76539	-3.35699
0.2	0.00993		2.12211	-2.56438
0.233333	0.01024		2.4812	-1.95953
0.266667	0.00993		2.84265	-1.68241
0.3	0.00897		3.20646	-1.33465
0.333333	0.01056		3.57263	-1.01261
0.366667	0.01025		3.94116	-1.01332
0.4	0.0086		4.31206	-0.958442
0.433333	0.00871		4.68531	-0.742252
0.466667	0.0084		5.06093	-0.589984
0.5	0.00665		5.43891	-0.447257
0.533333	0.00698		5.81925	-0.45685
0.566667	0.00598		6.20195	-0.408029
0.6	0.00541		6.58701	-0.410704
0.633333	0.00523		6.97444	-0.306386
0.666667	0.00508		7.36422	-0.319143
0.7	0.00591		7.75637	-0.282357
0.733333	0.00661		8.15088	-0.270004
0.766667	0.00734		8.54775	-0.269702
0.8	0.00638		8.94698	-0.108315
0.833333	0.0068		9.34857	-0.226168
0.866667	0.00742		9.75253	-0.247404
0.9	0.00668		10.1588	-0.132942
0.933333	0.00578
0.966667	0.00661
1	0.0062
1.03333	0.00627
1.06667	0.00626
1.1	0.00652
1.13333	0.006
1.16667	0.00627
1.2	0.00731
1.23333	0.0078
1.26667	0.0055
1.3	0.00499
1.33333	0.00514
1.36667	0.00469
1.4	0.00468
1.43333	0.00547
1.46667	0.00657
1.5	0.00647
1.53333	0.00718
1.56667	0.00745
1.6	0.00697
1.63333	0.00748
1.66667	0.00713
1.7	0.00612
1.73333	0.00449
1.76667	0.00354
1.8	0.00308
1.83333	0.00193
1.86667	0.00275
1.9	0.00338
1.93333	0.00259
1.96667	0.00355
2	0.00316
2.03333	0.00303
2.06667	0.00209
2.1	0.00271
2.13333	0.0023
2.16667	0.00217
2.2	0.00321
2.23333	0.00443
2.26667	0.00397
2.3	0.0024
2.33333	0.00246
2.36667	0.003
2.4	0.00442
2.43333	0.00465
2.46667	0.0039
2.5	0.00264
2.53333	0.00286
2.56667	0.00329
2.6	0.00336
2.63333	0.0025
2.66667	0.00172
2.7	0.00161
2.73333	0.00216
2.76667	0.00377
2.8	0.00355
2.83333	0.00289
2.86667	0.00151
2.9	0.000438818
2.93333	0.000698391
2.96667	0.00111
3	0.00129
3.03333	0.00102
3.06667	0.00174
3.1	0.00257
3.13333	0.00198
3.16667	0.00175
3.2	0.00253
3.23333	0.000818554
3.26667	0.00145
3.3	0.00211
3.33333	-7.17257e-05
3.36667	-0.000433152
3.4	8.84215e-05
3.43333	-0.000266005
3.46667	-0.00149
3.5	-0.000600858
3.53333	-0.00126
3.56667	-0.00138
3.6	-0.00138
3.63333	-0.00222
3.66667	-0.00156
3.7	-0.00197
3.73333	-0.000162843
3.76667	0.000416731
3.8	-0.0013
3.83333	-0.0021
3.86667	-0.00254
3.9	-0.00295
3.93333	-0.0033
3.96667	-0.0029
4	-0.0019
4.03333	-0.00113
4.06667	-0.00203
4.1	-0.00161
4.13333	-0.00129
4.16667	-0.00256
4.2	-0.000840813
4.23333	0.00115
4.26667	0.000529334
4.3	-4.6092e-05
4.33333	0.000200482
4.36667	2.90552e-05
4.4	-0.00111
4.43333	-0.0016
4.46667	-0.000788224
4.5	-0.000119651
4.53333	0.000667923
4.56667	0.000884497
4.6	-0.00095393
4.63333	-0.000511356
4.66667	-0.000227783
4.7	0.00104
4.73333	0.00158
4.76667	0.00208
4.8	0.00199
4.83333	0.00311
4.86667	0.0035
4.9	0.003
4.93333	0.00249
4.96667	0.00070138
5	4.59531e-05
5.03333	-0.000430473
5.06667	0.0001811
5.1	0.000719674
5.13333	0.0012
5.16667	0.00129
5.2	0.00179
5.23333	0.000672968
5.26667	-0.000152458
5.3	0.0011
5.33333	0.000313689
5.36667	0.00147
5.4	0.00182
5.43333	0.00023041
5.46667	0.000296983
5.5	0.000602557
5.53333	0.00121
5.56667	0.000632704
5.6	-0.000197723
5.63333	-0.000607149
5.66667	-0.00136
5.7	-0.00148
5.73333	-0.00142
5.76667	-0.00141
5.8	-0.000114281
5.83333	-1.57075e-05
5.86667	-0.000638134
5.9	0.00062644
5.93333	0.00121
5.96667	0.00171
6	0.00049916
6.03333	0.000624734
6.06667	-0.000145693
6.1	-0.01879
6.13333	-0.09236
6.16667	-0.15809
6.2	-0.19402
6.23333	-0.20963
6.26667	-0.21067
6.3	-0.20339
6.33333	-0.1897
6.36667	-0.17423
6.4	-0.15886
6.43333	-0.1408
6.46667	-0.12381
6.5	-0.10852
6.53333	-0.09445
6.56667	-0.08237
6.6	-0.07227
6.63333	-0.06225
6.66667	-0.05405
6.7	-0.04721
6.73333	-0.04194
6.76667	-0.03664
6.8	-0.03268
6.83333	-0.03064
6.86667	-0.02889
6.9	-0.02676
6.93333	-0.02449
6.96667	-0.02296
7	-0.02066
7.03333	-0.01934
7.06667	-0.01789
7.1	-0.01512
7.13333	-0.01409
7.16667	-0.0137
7.2	-0.0128
7.23333	-0.01131
7.26667	-0.01186
7.3	-0.01129
7.33333	-0.0102
7.36667	-0.01075
7.4	-0.01224
7.43333	-0.01096
7.46667	-0.01002
7.5	-0.0094
7.53333	-0.00964
7.56667	-0.00851
7.6	-0.00814
7.63333	-0.00755
7.66667	-0.00637
7.7	-0.00612
7.73333	-0.00559
7.76667	-0.00573
7.8	-0.00527
7.83333	-0.00586
7.86667	-0.00753
7.9	-0.00654
7.93333	-0.00567
7.96667	-0.00598
8	-0.00676
8.03333	-0.00741
8.06667	-0.00856
8.1	-0.00915
8.13333	-0.00751
8.16667	-0.00607
8.2	-0.00547
8.23333	-0.00427
8.26667	-0.00467
8.3	-0.00463
8.33333	-0.00386
8.36667	-0.00317
8.4	-0.0042
8.43333	-0.00388
8.46667	-0.00417
8.5	-0.00544
8.53333	-0.00537
8.56667	-0.00449
8.6	-0.00504
8.63333	-0.00474
8.66667	-0.00511
8.7	-0.00566
8.73333	-0.00644
8.76667	-0.00786
8.8	-0.00719
8.83333	-0.00673
8.86667	-0.00576
8.9	-0.00544
8.93333	-0.00698
8.96667	-0.0085
9	-0.00973
9.03333	-0.01109
9.06667	-0.01089
9.1	-0.00975
9.13333	-0.00864
9.16667	-0.00789
9.2	-0.0075
9.23333	-0.00745
9.26667	-0.00653
9.3	-0.00539
9.33333	-0.00549
9.36667	-0.00582
9.4	-0.00611
9.43333	-0.00655
9.46667	-0.00649
9.5	-0.00648
9.53333	-0.00692
9.56667	-0.00647
9.6	-0.00565
9.63333	-0.0033
9.66667	-0.00335
9.7	-0.00352
9.73333	-0.00331
9.76667	-0.00363
9.8	-0.00279
9.83333	-0.0035
9.86667	-0.00374
9.9	-0.00362
9.93333	-0.00403
9.96667	-0.00463
10	-0.00521
10.0333	-0.00301
10.0667	-0.00255
10.1	-0.00334
10.1333	-0.00202
10.1667	-0.00226
10.2	-0.0022
10.2333	-0.00122
10.2667	-0.000862422
10.3	0.000401966
10.3333	0.000345063
10.3667	-0.00079484
10.4	-0.000955743
10.4333	-0.00266
10.4667	-0.00402
10.5	-0.00429
10.5333	-0.00442
10.5667	-0.00538
10.6	-0.00464
10.6333	-0.00369
10.6667	-0.00336
10.7	-0.00422
10.7333	-0.00455
10.7667	-0.00431
10.8	-0.0032
10.8333	-0.00241
10.8667	-0.00298
10.9	-0.00377
10.9333	-0.00389
10.9667	-0.00459
11	-0.00454
11.0333	-0.00371
11.0667	-0.00359
11.1	-0.00386
11.1333	-0.00328
11.1667	-0.0023
11.2	-0.0016
11.2333	-0.00124
11.2667	-0.00223
11.3	-0.00141
11.3333	-0.00211
11.3667	-0.00239
11.4	-0.00113
11.4333	-0.00148
11.4667	-0.0016
11.5	-0.00171
11.5333	-0.00219
11.5667	-0.00128
11.6	-0.000370163
11.6333	-0.00104
11.6667	-0.000763529
11.7	-0.000909712
11.7333	-6.38753e-05
11.7667	0.000809249
11.8	-2.62599e-06
11.8333	-0.000284501
11.8667	-0.000511377
11.9	-0.000268252
11.9333	0.000154873
11.9667	0.00157
12	0.00127
12.0333	0.00143
12.0667	0.000203371
12.1	-0.02452
12.1333	-0.17968
12.1667	-0.4773
12.2	-0.86041
12.2333	-1.27408
12.2667	-1.67882
12.3	-2.04347
12.3333	-2.36318
12.3667	-2.63205
12.4	-2.84429
12.4333	-2.97608
12.4667	-2.9655
12.5	-2.83022
12.5333	-2.62532
12.5667	-2.38564
12.6	-2.13665
12.6333	-1.89892
12.6667	-1.67658
12.7	-1.47078
12.7333	-1.28655
12.7667	-1.12638
12.8	-0.9875
12.8333	-0.86565
12.8667	-0.76113
12.9	-0.67583
12.9333	-0.60045
12.9667	-0.53519
13	-0.47877
13.0333	-0.4296
13.0667	-0.38662
13.1	-0.34926
13.1333	-0.31658
13.1667	-0.28863
13.2	-0.26254
13.2333	-0.2406
13.2667	-0.22036
13.3	-0.20216
13.3333	-0.18625
13.3667	-0.1701
13.4	-0.15638
13.4333	-0.14397
13.4667	-0.1332
13.5	-0.12393
13.5333	-0.11381
13.5667	-0.10451
13.6	-0.09643
13.6333	-0.08836
13.6667	-0.08003
13.7	-0.07446
13.7333	-0.06957
13.7667	-0.06349
13.8	-0.05977
13.8333	-0.05505
13.8667	-0.05062
13.9	-0.04595
13.9333	-0.04133
13.9667	-0.03708
14	-0.03445
14.0333	-0.03104
14.0667	-0.02852
14.1	-0.02783
14.1333	-0.02771
14.1667	-0.02393
14.2	-0.0226
14.2333	-0.02109
14.2667	-0.01836
14.3	-0.0168
14.3333	-0.0157
14.3667	-0.01329
14.4	-0.01202
14.4333	-0.00979
14.4667	-0.00894
14.5	-0.00922
14.5333	-0.00781
14.5667	-0.00642
14.6	-0.00612
14.6333	-0.00597
14.6667	-0.00546
14.7	-0.00441
14.7333	-0.0035
14.7667	-0.00361
14.8	-0.00277
14.8333	-0.00118
14.8667	-0.00175
14.9	-0.00149
14.9333	-0.00131
14.9667	-0.00209
15	-0.00201
15.0333	-0.00195
15.0667	-0.00137
15.1	-0.00189
15.1333	-0.00266
15.1667	-0.00345
15.2	-0.00314
15.2333	-0.00345
15.2667	-0.00417
15.3	-0.00445
15.3333	-0.00353
15.3667	-0.00485
15.4	-0.00467
15.4333	-0.00354
15.4667	-0.0044
15.5	-0.00519
15.5333	-0.00626
15.5667	-0.00613
15.6	-0.00473
15.6333	-0.00442
15.6667	-0.00604
15.7	-0.0068
15.7333	-0.0064
15.7667	-0.00484
15.8	-0.00606
15.8333	-0.00515
15.8667	-0.00563
15.9	-0.00547
15.9333	-0.0052
15.9667	-0.00498
16	-0.00411
16.0333	-0.00387
16.0667	-0.00269
16.1	-0.00182
16.1333	-0.0015
16.1667	-0.00205
16.2	-0.0015
16.2333	-0.00105
16.2667	-0.00203
16.3	-0.00358
16.3333	-0.0032
16.3667	-0.00292
16.4	-0.00322
16.4333	-0.00286
16.4667	-0.00364
16.5	-0.00289
16.5333	-0.00188
16.5667	-0.00242
16.6	-0.00211
16.6333	-0.00111
16.6667	-0.000343576
16.7	4.12577e-05
16.7333	-0.000402909
16.7667	-0.000650076
16.8	-0.000814242
16.8333	-0.00172
16.8667	-0.00148
16.9	-0.00211
16.9333	-0.00109
16.9667	-0.00178
17	0.000193161
17.0333	-6.05667e-05
17.0667	0.000258706
17.1	0.000521978
17.1333	0.000680251
17.1667	0.00175
17.2	0.000981795
17.2333	0.000475068
17.2667	0.00037434
17.3	0.000249613
17.3333	0.000904885
17.3667	-9.38423e-05
17.4	-0.00034757
17.4333	-0.000843297
17.4667	-0.000686025
17.5	0.000451247
17.5333	0.00023952
17.5667	0.00104
17.6	-0.00072636
17.6333	-0.000666719
17.6667	-0.000191078
17.7	-0.000572437
17.7333	-0.00161
17.7667	-0.00222
17.8	-0.001
17.8333	0.000156127
17.8667	0.000156768
17.9	-0.000199591
17.9333	-0.00031995
17.9667	-0.000268309
18	-0.000694668
18.0333	-0.00113
18.0667	-0.00366
18.1	-0.02842
18.1333	-0.16721
18.1667	-0.42011
18.2	-0.72881
18.2333	-1.05295
18.2667	-1.36104
18.3	-1.63312
18.3333	-1.86413
18.3667	-2.05628
18.4	-2.21411
18.4333	-2.316
18.4667	-2.30858
18.5	-2.20412
18.5333	-2.04618
18.5667	-1.8641
18.6	-1.674
18.6333	-1.48727
18.6667	-1.31426
18.7	-1.15623
18.7333	-1.01474
18.7667	-0.89121
18.8	-0.78453
18.8333	-0.6946
18.8667	-0.61447
18.9	-0.54542
18.9333	-0.48548
18.9667	-0.43566
19	-0.39243
19.0333	-0.35354
19.0667	-0.31928
19.1	-0.2901
19.1333	-0.26574
19.1667	-0.24261
19.2	-0.22289
19.2333	-0.20363
19.2667	-0.18802
19.3	-0.17335
19.3333	-0.15912
19.3667	-0.14747
19.4	-0.13622
19.4333	-0.12699
19.4667	-0.11693
19.5	-0.10763
19.5333	-0.10039
19.5667	-0.09304
19.6	-0.08494
19.6333	-0.079
19.6667	-0.07299
19.7	-0.06857
19.7333	-0.06312
19.7667	-0.05867
19.8	-0.0534
19.8333	-0.049
19.8667	-0.04582
19.9	-0.04302
19.9333	-0.03996
19.9667	-0.0368
20	-0.03338
20.0333	-0.03083
20.0667	-0.0271
20.1	-0.02454
20.1333	-0.02175
20.1667	-0.01988
20.2	-0.02031
20.2333	-0.01992
20.2667	-0.01908
20.3	-0.01725
20.3333	-0.01553
20.3667	-0.01478
20.4	-0.01248
20.4333	-0.01238
20.4667	-0.01246
20.5	-0.01139
20.5333	-0.00909
20.5667	-0.00853
20.6	-0.00923
20.6333	-0.00892
20.6667	-0.00834
20.7	-0.00839
20.7333	-0.00973
20.7667	-0.01002
20.8	-0.00819
20.8333	-0.00683
20.8667	-0.00727
20.9	-0.0069
20.9333	-0.00459
20.9667	-0.00233
21	-0.00323
21.0333	-0.00392
21.0667	-0.0021
21.1	-6.13831e-05
21.1333	0.000928482
21.1667	-0.000251653
21.2	-0.00164
21.2333	-0.00134
21.2667	-0.000473057
21.3	-0.000515192
21.3333	-0.00112
21.3667	-0.000120462
21.4	0.000639404
21.4333	0.000446269
21.4667	0.000108134
21.5	3.99903e-06
21.5333	-0.000928136
21.5667	-0.00183
21.6	-0.000344405
21.6333	-0.00143
21.6667	-0.00142
21.7	-0.00064981
21.7333	-0.000618945
21.7667	-0.00089808
21.8	-0.000349214
21.8333	0.000383651
21.8667	0.000716516
21.9	-0.000452619
21.9333	0.000198246
21.9667	-0.000411888
22	-0.00136
22.0333	-0.00119
22.0667	-0.0017
22.1	-0.000541428
22.1333	0.000424437
22.1667	-0.00108
22.2	-0.00157
22.2333	-0.00339
22.2667	-0.00274
22.3	-0.00197
22.3333	-0.00118
22.3667	-0.000596506
22.4	-0.000430641
22.4333	0.000578224
22.4667	0.000582089
22.5	-0.000594046
22.5333	-0.00171
22.5667	-0.000972315
22.6	-0.00047045
22.6333	0.000665415
22.6667	-0.00084472
22.7	-0.0033
22.7333	-0.00346
22.7667	-0.00156
22.8	4.87409e-05
22.8333	-0.000619394
22.8667	-0.00222
22.9	-0.00457
22.9333	-0.00612
22.9667	-0.00734
23	-0.00715
23.0333	-0.00489
23.0667	-0.00419
23.1	-0.00337
23.1333	-0.0022
23.1667	-0.00184
23.2	-0.00214
23.2333	-0.00135
23.2667	0.00111
23.3	0.00134
23.3333	0.000355584
23.3667	-0.000517551
23.4	-0.0018
23.4333	-0.00259
23.4667	-0.0028
23.5	-0.00223
23.5333	-0.000250757
23.5667	-0.000897346
23.6	-0.000825936
23.6333	8.04747e-05
23.6667	-0.000483115
23.7	-0.00131
23.7333	-0.000959294
23.7667	-0.00163
23.8	-0.00283
23.8333	-0.00141
23.8667	-0.000172652
23.9	-0.00108
23.9333	-0.00205
23.9667	-0.00353
24	-0.00496
24.0333	-0.00533
24.0667	-0.00491
24.1	-0.02734
24.1333	-0.13236
24.1667	-0.32149
24.2	-0.55251
24.2333	-0.79494
24.2667	-1.0291
24.3	-1.24144
24.3333	-1.4247
24.3667	-1.57593
24.4	-1.69467
24.4333	-1.76767
24.4667	-1.76486
24.5	-1.69295
24.5333	-1.57694
24.5667	-1.43897
24.6	-1.29349
24.6333	-1.14972
24.6667	-1.01619
24.7	-0.89496
24.7333	-0.78774
24.7667	-0.69189
24.8	-0.60692
24.8333	-0.53376
24.8667	-0.46963
24.9	-0.4139
24.9333	-0.36428
24.9667	-0.32289
25	-0.2872
25.0333	-0.25616
25.0667	-0.22896
25.1	-0.20663
25.1333	-0.18817
25.1667	-0.1718
25.2	-0.15823
25.2333	-0.14559
25.2667	-0.13441
25.3	-0.12454
25.3333	-0.11486
25.3667	-0.10657
25.4	-0.09896
25.4333	-0.0907
25.4667	-0.08202
25.5	-0.07462
25.5333	-0.06708
25.5667	-0.06056
25.6	-0.05607
25.6333	-0.05084
25.6667	-0.04554
25.7	-0.04194
25.7333	-0.03706
25.7667	-0.03368
25.8	-0.03017
25.8333	-0.02678
25.8667	-0.0232
25.9	-0.01987
25.9333	-0.01773
25.9667	-0.01612
26	-0.01522
26.0333	-0.01386
26.0667	-0.01317
26.1	-0.01109
26.1333	-0.00841
26.1667	-0.00673
26.2	-0.0053
26.2333	-0.00423
26.2667	-0.00333
26.3	-0.00226
26.3333	-0.00144
26.3667	-0.000981259
26.4	-0.000930858
26.4333	-0.000382457
26.4667	7.49442e-05
26.5	0.000378345
26.5333	-0.000284254
26.5667	0.00124
26.6	0.00216
26.6333	0.00261
26.6667	0.00296
26.7	0.00409
26.7333	0.00632
26.7667	0.00657
26.8	0.00597
26.8333	0.00749
26.8667	0.00807
26.9	0.00759
26.9333	0.00674
26.9667	0.0068
27	0.00673
27.0333	0.00627
27.0667	0.00627
27.1	0.00701
27.1333	0.00804
27.1667	0.00813
27.2	0.00644
27.2333	0.0064
27.2667	0.00701
27.3	0.00633
27.3333	0.00724
27.3667	0.00635
27.4	0.00659
27.4333	0.00706
27.4667	0.00547
27.5	0.00571
27.5333	0.00518
27.5667	0.00332
27.6	0.00338
27.6333	0.00479
27.6667	0.00558
27.7	0.00606
27.7333	0.00626
27.7667	0.00641
27.8	0.00779
27.8333	0.00743
27.8667	0.00613
27.9	0.00457
27.9333	0.00367
27.9667	0.00286
28	0.00233
28.0333	0.00312
28.0667	0.0039
28.1	0.00334
28.1333	0.00344
28.1667	0.00333
28.2	0.00142
28.2333	0.000959194
28.2667	0.00172
28.3	0.00268
28.3333	0.00282
28.3667	0.00287
28.4	0.00152
28.4333	0.00117
28.4667	0.000923
28.5	0.00105
28.5333	6.4802e-05
28.5667	0.00139
28.6	0.00241
28.6333	0.0032
28.6667	0.00329
28.7	0.00424
28.7333	0.00424
28.7667	0.00403
28.8	0.00291
28.8333	0.00276
28.8667	0.00408
28.9	0.00346
28.9333	0.00206
28.9667	0.00198
29	0.00237
29.0333	0.00263
29.0667	0.00106
29.1	0.0013
29.1333	0.00296
29.1667	0.00409
29.2	0.00315
29.2333	0.00268
29.2667	0.00325
29.3	0.00269
29.3333	0.00224
29.3667	0.00248
29.4	0.00173
29.4333	0.00156
29.4667	0.00289
29.5	0.00159
29.5333	0.00115
29.5667	0.000945128
29.6	-1.33275e-05
29.6333	0.0013
29.6667	-6.02382e-05
29.7	-0.00116
29.7333	-0.000498149
29.7667	-0.000239604
29.8	-0.00057406
29.8333	-0.000874515
29.8667	0.00022803
29.9	0.000962574
29.9333	0.00197
29.9667	0.000365664
30	-0.000247792
30.0333	0.00171
30.0667	0.00112
30.1	-0.0176
30.1333	-0.1011
30.1667	-0.24686
30.2	-0.42495
30.2333	-0.60731
30.2667	-0.77986
30.3	-0.93666
30.3333	-1.07177
30.3667	-1.18359
30.4	-1.27389
30.4333	-1.33215
30.4667	-1.32897
30.5	-1.27306
30.5333	-1.18625
30.5667	-1.08259
30.6	-0.97323
30.6333	-0.86683
30.6667	-0.76695
30.7	-0.67679
30.7333	-0.59424
30.7667	-0.52176
30.8	-0.45949
30.8333	-0.40567
30.8667	-0.35842
30.9	-0.31696
30.9333	-0.28298
30.9667	-0.25291
31	-0.22621
31.0333	-0.20269
31.0667	-0.18361
31.1	-0.16727
31.1333	-0.15231
31.1667	-0.13998
31.2	-0.12764
31.2333	-0.11664
31.2667	-0.10749
31.3	-0.09918
31.3333	-0.09233
31.3667	-0.08553
31.4	-0.07944
31.4333	-0.07468
31.4667	-0.07004
31.5	-0.06556
31.5333	-0.06004
31.5667	-0.05641
31.6	-0.05152
31.6333	-0.04811
31.6667	-0.04486
31.7	-0.04154
31.7333	-0.03891
31.7667	-0.03637
31.8	-0.03334
31.8333	-0.03152
31.8667	-0.02956
31.9	-0.0282
31.9333	-0.0267
31.9667	-0.0247
32	-0.02242
32.0333	-0.02112
32.0667	-0.01943
32.1	-0.01859
32.1333	-0.0172
32.1667	-0.01541
32.2	-0.01491
32.2333	-0.01334
32.2667	-0.01145
32.3	-0.01209
32.3333	-0.01225
32.3667	-0.01075
32.4	-0.0105
32.4333	-0.01026
32.4667	-0.01003
32.5	-0.01032
32.5333	-0.01031
32.5667	-0.01049
32.6	-0.01
32.6333	-0.009
32.6667	-0.00935
32.7	-0.0089
32.7333	-0.00717
32.7667	-0.00762
32.8	-0.00681
32.8333	-0.00649
32.8667	-0.0066
32.9	-0.00595
32.9333	-0.00454
32.9667	-0.00423
33	-0.00356
33.0333	-0.00402
33.0667	-0.00289
33.1	-0.00271
33.1333	-0.00332
33.1667	-0.00318
33.2	-0.00384
33.2333	-0.00326
33.2667	-0.00162
33.3	0.000670314
33.3333	0.000734301
33.3667	-0.000238713
33.4	-0.000534726
33.4333	-0.00157
33.4667	-0.000558752
33.5	-1.17652e-05
33.5333	0.000378222
33.5667	1.02085e-05
33.6	-0.000270805
33.6333	-0.000933818
33.6667	-0.00113
33.7	-0.0011
33.7333	-0.000766857
33.7667	-0.00022387
33.8	-0.000667884
33.8333	-0.000428897
33.8667	-0.00016491
33.9	-0.0019
33.9333	-0.00203
33.9667	-0.0017
34	-0.00294
34.0333	-0.00346
34.0667	-0.00327
34.1	-0.00353
34.1333	-0.00305
34.1667	-0.00228
34.2	-0.00267
34.2333	-0.00345
34.2667	-0.00319
34.3	-0.00322
34.3333	-0.00318
34.3667	-0.00302
34.4	-0.004
34.4333	-0.00445
34.4667	-0.00351
34.5	-0.00302
34.5333	-0.00347
34.5667	-0.00401
34.6	-0.00332
34.6333	-0.00338
34.6667	-0.0028
34.7	-0.00358
34.7333	-0.00409
34.7667	-0.00422
34.8	-0.00448
34.8333	-0.00461
34.8667	-0.00498
34.9	-0.00569
34.9333	-0.00527
34.9667	-0.00459
35	-0.00487
35.0333	-0.00624
35.0667	-0.00642
35.1	-0.00651
35.1333	-0.00614
35.1667	-0.0065
35.2	-0.00596
35.2333	-0.00546
35.2667	-0.00544
35.3	-0.00474
35.3333	-0.00332
35.3667	-0.00281
35.4	-0.00189
35.4333	-0.000872844
35.4667	-0.000758286
35.5	0.000919272
35.5333	0.000889831
35.5667	0.000279389
35.6	0.00112
35.6333	0.000402505
35.6667	-0.000658937
35.7	-0.000789379
35.7333	-0.00123
35.7667	-0.00112
35.8	0.000829295
35.8333	-0.000675147
35.8667	-0.00151
35.9	-0.00152
35.9333	-0.000660093
35.9667	0.000764914
36	0.00128
36.0333	0.00223
36.0667	0.00264
36.1	-0.01059
36.1333	-0.07038
36.1667	-0.18095
36.2	-0.31594
36.2333	-0.45704
36.2667	-0.59387
36.3	-0.71891
36.3333	-0.82469
36.3667	-0.91278
36.4	-0.98401
36.4333	-1.03013
36.4667	-1.02777
36.5	-0.98227
36.5333	-0.91102
36.5667	-0.8284
36.6	-0.74294
36.6333	-0.66045
36.6667	-0.58335
36.7	-0.51242
36.7333	-0.44862
36.7667	-0.39442
36.8	-0.3467
36.8333	-0.30374
36.8667	-0.26841
36.9	-0.23836
36.9333	-0.21099
36.9667	-0.18843
37	-0.16838
37.0333	-0.15078
37.0667	-0.13652
37.1	-0.12448
37.1333	-0.1136
37.1667	-0.10403
37.2	-0.09493
37.2333	-0.08771
37.2667	-0.07993
37.3	-0.07132
37.3333	-0.06517
37.3667	-0.05984
37.4	-0.05464
37.4333	-0.05072
37.4667	-0.04697
37.5	-0.04306
37.5333	-0.03967
37.5667	-0.03711
37.6	-0.03328
37.6333	-0.03198
37.6667	-0.02986
37.7	-0.02715
37.7333	-0.02465
37.7667	-0.02346
37.8	-0.0229
37.8333	-0.02143
37.8667	-0.0202
37.9	-0.01849
37.9333	-0.01759
37.9667	-0.01753
38	-0.01521
38.0333	-0.01429
38.0667	-0.01371
38.1	-0.01452
38.1333	-0.01341
38.1667	-0.01162
38.2	-0.01066
38.2333	-0.00962
38.2667	-0.00899
38.3	-0.00729
38.3333	-0.00708
38.3667	-0.00671
38.4	-0.00558
38.4333	-0.00472
38.4667	-0.00435
38.5	-0.00464
38.5333	-0.00477
38.5667	-0.0056
38.6	-0.00432
38.6333	-0.00462
38.6667	-0.00476
38.7	-0.00358
38.7333	-0.00295
38.7667	-0.00244
38.8	-0.00152
38.8333	-2.50145e-05
38.8667	-0.00107
38.9	-0.00116
38.9333	-0.00182
38.9667	-0.00285
39	-0.00319
39.0333	-0.00355
39.0667	-0.00234
39.1	-0.00195
39.1333	-0.00202
39.1667	-0.00227
39.2	-0.00214
39.2333	-0.000531158
39.2667	-0.000686503
39.3	-0.000634849
39.3333	-0.00205
39.3667	-0.00259
39.4	-0.0026
39.4333	-0.00236
39.4667	-0.00242
39.5	-0.00135
39.5333	0.000463734
39.5667	0.000586389
39.6	0.00159
39.6333	0.00264
39.6667	0.00386
39.7	0.00337
39.7333	0.000848663
39.7667	0.000479317
39.8	-0.000330028
39.8333	-0.000648373
39.8667	-0.00178
39.9	-0.00206
39.9333	-0.00188
39.9667	-0.00224
40	-0.0022
40.0333	-0.00122
40.0667	-0.00058179
40.1	0.000372865
40.1333	0.000325519
40.1667	-4.08261e-05
40.2	0.000399829
40.2333	-0.000233517
40.2667	0.000206138
40.3	0.000781793
40.3333	-0.000446553
40.3667	-8.08978e-05
40.4	0.000148757
40.4333	0.000488412
40.4667	0.00117
40.5	0.000774721
40.5333	0.000575376
40.5667	0.00033303
40.6	-6.43148e-05
40.6333	-0.00025966
40.6667	-0.000337005
40.7	0.00104
40.7333	0.000479304
40.7667	0.000691959
40.8	0.000259613
40.8333	-0.000237732
40.8667	0.000212923
40.9	0.000461578
40.9333	-0.000421768
40.9667	0.000466887
41	-0.000136288
41.0333	0.000320244
41.0667	-0.000196224
41.1	-0.000562693
41.1333	-6.21609e-05
41.1667	-0.000427629
41.2	-0.00111
41.2333	-0.000407565
41.2667	-0.00195
41.3	-0.00237
41.3333	-0.00212
41.3667	-0.00119
41.4	-0.00115
41.4333	-0.000738375
41.4667	0.000120157
41.5	-0.000493311
41.5333	-0.000235779
41.5667	2.67525e-05
41.6	0.000414284
41.6333	0.000816816
41.6667	6.73479e-05
41.7	-0.00044412
41.7333	-0.00071835
41.7667	-0.000787856
41.8	-0.000961362
41.8333	-0.000281869
41.8667	0.000550625
41.9	-0.000684881
41.9333	-0.000276387
41.9667	-0.000718893
42	0.000698601
42.0333	0.000903095
42.0667	-0.000520411
42.1	-0.01143
42.1333	-0.06399
42.1667	-0.15292
42.2	-0.25869
42.2333	-0.36959
42.2667	-0.47472
42.3	-0.56849
42.3333	-0.65066
42.3667	-0.71884
42.4	-0.77316
42.4333	-0.80771
42.4667	-0.80241
42.5	-0.76298
42.5333	-0.7061
42.5667	-0.64174
42.6	-0.57552
42.6333	-0.50898
42.6667	-0.4481
42.7	-0.394
42.7333	-0.34473
42.7667	-0.30236
42.8	-0.26534
42.8333	-0.23306
42.8667	-0.20412
42.9	-0.18055
42.9333	-0.15984
42.9667	-0.14285
43	-0.12755
43.0333	-0.11431
43.0667	-0.10305
43.1	-0.0929
43.1333	-0.08295
43.1667	-0.07416
43.2	-0.06699
43.2333	-0.06088
43.2667	-0.05455
43.3	-0.05051
43.3333	-0.04511
43.3667	-0.04015
43.4	-0.03653
43.4333	-0.03387
43.4667	-0.03036
43.5	-0.02881
43.5333	-0.02628
43.5667	-0.02385
43.6	-0.02325
43.6333	-0.02097
43.6667	-0.0188
43.7	-0.01658
43.7333	-0.01472
43.7667	-0.01296
43.8	-0.01167
43.8333	-0.00986
43.8667	-0.00995
43.9	-0.01009
43.9333	-0.00992
43.9667	-0.00953
44	-0.00887
44.0333	-0.00759
44.0667	-0.00632
44.1	-0.00454
44.1333	-0.00275
44.1667	-0.00386
44.2	-0.00406
44.2333	-0.00312
44.2667	-0.00243
44.3	-0.00267
44.3333	-0.0021
44.3667	-0.00208
44.4	-0.00129
44.4333	-0.00174
44.4667	-0.00212
44.5	-0.00292
44.5333	-0.00274
44.5667	-0.00375
44.6	-0.00414
44.6333	-0.00273
44.6667	-0.0025
44.7	-0.00192
44.7333	-0.00324
44.7667	-0.00355
44.8	-0.0025
44.8333	-0.0029
44.8667	-0.00272
44.9	-0.00219
44.9333	-0.00294
44.9667	-0.00212
45	-0.000398686
45.0333	7.73163e-05
45.0667	-0.000429681
45.1	-0.00124
45.1333	-0.000281677
45.1667	-0.000216674
45.2	-0.000595672
45.2333	-0.000565669
45.2667	0.000137333
45.3	-0.000200665
45.3333	0.000884338
45.3667	0.00068234
45.4	-0.000682657
45.4333	-0.000681655
45.4667	-0.000143653
45.5	-0.00049765
45.5333	-0.00107
45.5667	0.000634355
45.6	0.000512357
45.6333	0.00208
45.6667	0.00194
45.7	0.00111
45.7333	0.00119
45.7667	0.0031
45.8	0.00379
45.8333	0.00299
45.8667	0.00232
45.9	0.00341
45.9333	0.00344
45.9667	0.00381
46	0.00257
46.0333	0.00276
46.0667	0.00224
46.1	0.00261
46.1333	0.00246
46.1667	0.00333
46.2	0.00381
46.2333	0.00344
46.2667	0.00333
46.3	0.00317
46.3333	0.00291
46.3667	0.00141
46.4	0.00105
46.4333	0.00147
46.4667	0.00235
46.5	0.00172
46.5333	0.00102
46.5667	0.000115426
46.6	0.000390429
46.6333	-0.00116
46.6667	-0.00123
46.7	-0.000272564
46.7333	0.000337438
46.7667	7.34405e-05
46.8	1.34429e-05
46.8333	0.000617993
46.8667	0.00129
46.9	0.00197
46.9333	0.0011
46.9667	0.000974234
47	0.00167
47.0333	0.00108
47.0667	0.000678414
47.1	0.000156474
47.1333	-0.000759466
47.1667	-0.00144
47.2	-0.000713346
47.2333	0.000118714
47.2667	-0.000201226
47.3	-0.00143
47.3333	-0.00203
47.3667	-0.00261
47.4	-0.00273
47.4333	-0.00144
47.4667	-0.00103
47.5	-0.000156805
47.5333	0.000180255
47.5667	0.000958952
47.6	0.000625953
47.6333	0.00112
47.6667	0.00166
47.7	0.00144
47.7333	0.000250957
47.7667	-0.000372043
47.8	-0.00164
47.8333	-0.00209
47.8667	-0.0019
47.9	-0.00153
47.9333	-0.000640038
47.9667	-2.20376e-05
48	0.000825963
48.0333	0.000843964
48.0667	5.69649e-05
48.1	-0.01126
48.1333	-0.0549
48.1667	-0.12718
48.2	-0.21058
48.2333	-0.29563
48.2667	-0.37665
48.3	-0.45146
48.3333	-0.5162
48.3667	-0.56987
48.4	-0.61384
48.4333	-0.64163
48.4667	-0.63922
48.5	-0.60932
48.5333	-0.56482
48.5667	-0.51167
48.6	-0.45713
48.6333	-0.40289
48.6667	-0.35203
48.7	-0.30732
48.7333	-0.26769
48.7667	-0.23214
48.8	-0.2019
48.8333	-0.17612
48.8667	-0.15432
48.9	-0.13591
48.9333	-0.11955
48.9667	-0.10585
49	-0.0935
49.0333	-0.08269
49.0667	-0.07412
49.1	-0.06633
49.1333	-0.05835
49.1667	-0.05292
49.2	-0.04769
49.2333	-0.04343
49.2667	-0.04019
49.3	-0.03587
49.3333	-0.0321
49.3667	-0.02919
49.4	-0.02598
49.4333	-0.02339
49.4667	-0.02113
49.5	-0.01909
49.5333	-0.01704
49.5667	-0.01591
49.6	-0.01482
49.6333	-0.01365
49.6667	-0.01182
49.7	-0.01084
49.7333	-0.00976
49.7667	-0.00916
49.8	-0.00797
49.8333	-0.00651
49.8667	-0.00581
49.9	-0.00436
49.9333	-0.00504
49.9667	-0.00488
50	-0.0035
50.0333	-0.0048
50.0667	-0.00476
50.1	-0.00291
50.1333	-0.0027
50.1667	-0.00206
50.2	-0.00171
50.2333	-0.00205
50.2667	-0.0023
50.3	-0.00124
50.3333	8.86415e-06
50.3667	0.00159
50.4	0.00213
50.4333	0.00174
50.4667	0.00136
50.5	0.00244
50.5333	0.00217
50.5667	0.00203
50.6	0.00174
50.6333	0.00267
50.6667	0.00266
50.7	0.00245
50.7333	0.00393
50.7667	0.00479
50.8	0.00501
50.8333	0.00366
50.8667	0.00391
50.9	0.00437
50.9333	0.00446
50.9667	0.00321
51	0.00378
51.0333	0.00478
51.0667	0.00434
51.1	0.00374
51.1333	0.00358
51.1667	0.00464
51.2	0.00532
51.2333	0.00515
51.2667	0.00479
51.3	0.00517
51.3333	0.00485
51.3667	0.00413
51.4	0.00347
51.4333	0.00404
51.4667	0.00371
51.5	0.00413
51.5333	0.00462
51.5667	0.00414
51.6	0.00319
51.6333	0.00273
51.6667	0.00273
51.7	0.00281
51.7333	0.00187
51.7667	0.00157
51.8	0.00272
51.8333	0.00418
51.8667	0.00354
51.9	0.00371
51.9333	0.00434
51.9667	0.00563
52	0.00599
52.0333	0.0049
52.0667	0.00405
52.1	0.00388
52.1333	0.0028
52.1667	0.00253
52.2	0.00407
52.2333	0.00305
52.2667	0.00253
52.3	0.00186
52.3333	0.00155
52.3667	0.00283
52.4	0.00257
52.4333	0.0017
52.4667	0.00172
52.5	0.00111
52.5333	0.00138
52.5667	0.00199
52.6	0.00133
52.6333	-0.000264841
52.6667	-0.00103
52.7	-0.00218
52.7333	-0.00166
52.7667	-0.00215
52.8	-0.00106
52.8333	-0.000915831
52.8667	-0.00121
52.9	-0.00111
52.9333	-0.00132
52.9667	-0.00243
53	-0.00136
53.0333	-0.00101
53.0667	-0.000277251
53.1	-0.000598882
53.1333	-0.000585514
53.1667	0.000337855
53.2	0.0011
53.2333	0.00182
53.2667	0.00211
53.3	0.00114
53.3333	0.000743698
53.3667	0.000566067
53.4	0.000630435
53.4333	0.00204
53.4667	0.00222
53.5	0.000938407
53.5333	-0.000843963
53.5667	-0.000527333
53.6	-0.00154
53.6333	-0.00144
53.6667	-0.000682441
53.7	-0.000251811
53.7333	0.000232819
53.7667	0.00022545
53.8	0.00014808
53.8333	8.67103e-05
53.8667	7.03407e-05
53.9	0.000988971
53.9333	0.000684601
53.9667	0.000989232
54	-0.000503138
54.0333	-0.00119
54.0667	-0.00242
54.1	-0.01228
54.1333	-0.0494
54.1667	-0.11007
54.2	-0.17709
54.2333	-0.24743
54.2667	-0.31461
54.3	-0.37642
54.3333	-0.42927
54.3667	-0.47118
54.4	-0.50657
54.4333	-0.5315
54.4667	-0.52754
54.5	-0.50058
54.5333	-0.46129
54.5667	-0.41488
54.6	-0.36803
54.6333	-0.32484
54.6667	-0.28464
54.7	-0.24834
54.7333	-0.21596
54.7667	-0.18938
54.8	-0.16502
54.8333	-0.14344
54.8667	-0.1254
54.9	-0.11252
54.9333	-0.10017
54.9667	-0.08891
55	-0.07901
55.0333	-0.0711
55.0667	-0.06525
55.1	-0.05834
55.1333	-0.05174
55.1667	-0.04795
55.2	-0.04338
55.2333	-0.0396
55.2667	-0.03583
55.3	-0.03222
55.3333	-0.03068
55.3667	-0.02858
55.4	-0.02786
55.4333	-0.02558
55.4667	-0.02481
55.5	-0.02349
55.5333	-0.02138
55.5667	-0.0196
55.6	-0.01822
55.6333	-0.01717
55.6667	-0.01587
55.7	-0.01534
55.7333	-0.01341
55.7667	-0.01195
55.8	-0.01059
55.8333	-0.00959
55.8667	-0.00936
55.9	-0.00865
55.9333	-0.00764
55.9667	-0.00768
56	-0.00753
56.0333	-0.00783
56.0667	-0.00867
56.1	-0.00933
56.1333	-0.00687
56.1667	-0.00666
56.2	-0.00536
56.2333	-0.00512
56.2667	-0.00521
56.3	-0.00408
56.3333	-0.00379
56.3667	-0.00481
56.4	-0.00566
56.4333	-0.00399
56.4667	-0.00277
56.5	-0.00226
56.5333	-0.00178
56.5667	-0.00129
56.6	-0.000225044
56.6333	-0.00205
56.6667	-0.00285
56.7	-0.00241
56.7333	-0.00196
56.7667	-0.00284
56.8	-0.00226
56.8333	-0.00225
56.8667	-0.00163
56.9	-0.000852112
56.9333	0.000132436
56.9667	0.00142
57	0.002
57.0333	0.00288
57.0667	0.00203
57.1	0.00252
57.1333	0.00257
57.1667	0.00155
57.2	0.00196
57.2333	0.00192
57.2667	0.000632916
57.3	0.00107
57.3333	0.00112
57.3667	0.00202
57.4	0.00234
57.4333	0.00271
57.4667	0.00337
57.5	0.00323
57.5333	0.00239
57.5667	0.0018
57.6	0.00163
57.6333	0.00144
57.6667	0.00134
57.7	0.00059904
57.7333	0.000646588
57.7667	0.000800136
57.8	0.000652684
57.8333	0.0019
57.8667	0.00258
57.9	0.00237
57.9333	0.00237
57.9667	0.00246
58	0.00244
58.0333	0.00297
58.0667	0.00319
58.1	0.0034
58.1333	0.00297
58.1667	0.00181
58.2	0.00161
58.2333	0.00185
58.2667	0.0014
58.3	0.00108
58.3333	0.000211453
58.3667	0.000110001
58.4	-0.000730451
58.4333	-0.00129
58.4667	-0.00162
58.5	-0.000903807
58.5333	0.00076902
58.5667	0.000901615
58.6	0.000797211
58.6333	0.00124
58.6667	0.000213402
58.7	2.49973e-05
58.7333	-0.000169407
58.7667	-9.58117e-05
58.8	-0.000316216
58.8333	-0.000251621
58.8667	-0.00127
58.9	-0.0014
58.9333	-0.00164
58.9667	-0.00118
59	-0.00139
59.0333	-0.00155
59.0667	-0.000758452
59.1	0.000445143
59.1333	-0.000280261
59.1667	-9.56659e-05
59.2	-0.00066707
59.2333	0.000534525
59.2667	0.000696942
59.3	0.000335803
59.3333	-0.000268337
59.3667	-0.000319477
59.4	-0.000370617
59.4333	-0.00141
59.4667	-0.00219
59.5	-0.00161
59.5333	-0.00199
59.5667	-0.0012
59.6	-0.00174
59.6333	-0.00166
59.6667	-0.000820737
59.7	-0.000602877
59.7333	0.000121983
59.7667	0.00107
59.8	0.00129
59.8333	0.000762563
59.8667	1.9423e-05
59.9	-4.3717e-05
59.9333	-0.000438857
59.9667	-0.000504997
60	-0.000850869
60.0333	-0.0011
60.0667	-0.000325656
60.1	-0.00789
60.1333	-0.03874
60.1667	-0.08881
60.2	-0.14562
60.2333	-0.20446
60.2667	-0.26032
60.3	-0.30955
60.3333	-0.35469
60.3667	-0.39208
60.4	-0.42278
60.4333	-0.44207
60.4667	-0.4381
60.5	-0.41346
60.5333	-0.37898
60.5667	-0.34157
60.6	-0.30342
60.6333	-0.26819
60.6667	-0.23455
60.7	-0.2046
60.7333	-0.17609
60.7667	-0.15142
60.8	-0.13151
60.8333	-0.11585
60.8667	-0.09946
60.9	-0.08553
60.9333	-0.07429
60.9667	-0.06457
61	-0.05767
61.0333	-0.05266
61.0667	-0.04891
61.1	-0.04467
61.1333	-0.04319
61.1667	-0.04241
61.2	-0.03777
61.2333	-0.03319
61.2667	-0.02717
61.3	-0.02116
61.3333	-0.01671
61.3667	-0.01411
61.4	-0.0113
61.4333	-0.00889
61.4667	-0.00847
61.5	-0.00784
61.5333	-0.00606
61.5667	-0.00389
61.6	-0.00118
61.6333	-0.000507777
61.6667	-0.000758319
61.7	0.00104
61.7333	0.000878596
61.7667	0.00156
61.8	0.00205
61.8333	0.00178
61.8667	0.00105
61.9	0.00107
61.9333	0.00115
61.9667	0.0021
62	0.00245
62.0333	0.00229
62.0667	0.00191
62.1	0.000854631
62.1333	0.000890089
62.1667	0.00194
62.2	0.00223
62.2333	0.00178
62.2667	0.00239
62.3	0.00206
62.3333	0.00177
62.3667	0.00297
62.4	0.00185
62.4333	-0.00087028
62.4667	-0.00392
62.5	-0.00582
62.5333	-0.00905
62.5667	-0.01025
62.6	-0.0114
62.6333	-0.01146
62.6667	-0.01206
62.7	-0.01048
62.7333	-0.01035
62.7667	-0.00936
62.8	-0.00884
62.8333	-0.00605
62.8667	-0.00444
62.9	-0.00301
62.9333	-0.0033
62.9667	-0.00362
63	-0.00375
63.0333	-0.00343
63.0667	-0.00377
63.1	-0.00449
63.1333	-0.00512
63.1667	-0.00347
63.2	-0.0022
63.2333	-0.00239
63.2667	-0.00238
63.3	-6.22306e-05
63.3333	0.000731656
63.3667	0.000283542
63.4	-0.000636571
63.4333	-0.000708685
63.4667	-0.000474798
63.5	-0.000365912
63.5333	0.00105
63.5667	0.00223
63.6	0.00264
63.6333	0.00239
63.6667	0.00218
63.7	0.00224
63.7333	0.00244
63.7667	0.00235
63.8	0.00201
63.8333	0.00143
63.8667	0.00113
63.9	0.00101
63.9333	0.00213
63.9667	0.00217
64	0.00361
64.0333	0.00496
64.0667	0.00444
64.1	0.00191
64.1333	0.000611932
64.1667	0.00188
64.2	0.00188
64.2333	0.00219
64.2667	0.00133
64.3	0.00155
64.3333	0.00216
64.3667	0.00105
64.4	0.00228
64.4333	0.00195
64.4667	0.00263
64.5	0.00237
64.5333	0.00253
64.5667	0.00168
64.6	0.000416154
64.6333	0.00166
64.6667	0.00168
64.7	0.00242
64.7333	0.000918198
64.7667	-0.000712291
64.8	0.00043822
64.8333	0.000550731
64.8667	0.0014
64.9	0.000378754
64.9333	0.000569265
64.9667	-0.000492224
65	0.000647287
65.0333	0.000989798
65.0667	0.00119
65.1	0.00066282
65.1333	0.00192
65.1667	0.00111
65.2	0.00114
65.2333	-0.000658518
65.2667	0.000737839
65.3	-0.000913803
65.3333	0.000830554
65.3667	-0.000779089
65.4	0.000749269
65.4333	0.000475626
65.4667	-0.000247016
65.5	-0.000320659
65.5333	-0.000569302
65.5667	0.000440056
65.6	-0.000813587
65.6333	0.000974771
65.6667	-0.000915872
65.7	9.48551e-06
65.7333	-0.00122
65.7667	-0.00131
65.8	-0.00122
65.8333	-0.00245
65.8667	0.000305661
65.9	-0.00184
65.9333	-0.00184
65.9667	0.00315
66	0.000685052
66.0333	-0.00285
66.0667	0.00187
66.1	-0.00407
66.1333	-0.03996
66.1667	-0.08657
66.2	-0.12754
66.2333	-0.17287
66.2667	-0.21722
66.3	-0.25584
66.3333	-0.29077
66.3667	-0.32043
66.4	-0.34606
66.4333	-0.35934
66.4667	-0.36142
66.5	-0.34258
66.5333	-0.3087
66.5667	-0.27282
66.6	-0.24028
66.6333	-0.20916
[truncated: 3,223 more rows]

## Sheet: Figure 3B
Time (s)	μcal/sec		Molar Ratio	kcal/mole of injectant
0.0333333	-0.01057		0.7242	-2.57098
0.0666667	-0.01145		1.41876	-2.12796
0.1	-0.01161		2.11804	-1.62466
0.133333	-0.01202		2.82205	-1.18342
0.166667	-0.01233		3.53078	-0.831993
0.2	-0.01194		4.24423	-0.827564
0.233333	-0.01124		4.9624	-0.486847
0.266667	-0.01139		5.6853	-0.831432
0.3	-0.01173		6.41291	-0.490231
0.333333	-0.0118		7.14526	-0.40647
0.366667	-0.01245		7.88232	-0.301692
0.4	-0.01177		8.62411	-0.426019
0.433333	-0.01216		9.37062	-0.261245
0.466667	-0.01302		10.1219	-0.291215
0.5	-0.01371		10.8778	-0.197222
0.533333	-0.01317		11.6385	-0.244473
0.566667	-0.01299		12.4039	-0.126579
0.6	-0.01201		13.174	-0.183332
0.633333	-0.01209		13.9489	-0.0805212
0.666667	-0.01261		14.7284	-0.117405
0.7	-0.01296		15.5127	-0.106815
0.733333	-0.0116		16.3018	-0.189656
0.766667	-0.0106		17.0955	-0.112696
0.8	-0.01163		17.894	-0.119724
0.833333	-0.01348		18.6972	-0.124371
0.866667	-0.01245		19.5051	-0.0944785
0.9	-0.01099		20.3177	-0.0922897
0.933333	-0.0118
0.966667	-0.01218
1	-0.01132
1.03333	-0.01183
1.06667	-0.013
1.1	-0.01248
1.13333	-0.01186
1.16667	-0.01133
1.2	-0.009
1.23333	-0.00904
1.26667	-0.01008
1.3	-0.01136
1.33333	-0.01066
1.36667	-0.00982
1.4	-0.00882
1.43333	-0.00877
1.46667	-0.00784
1.5	-0.0067
1.53333	-0.00565
1.56667	-0.00589
1.6	-0.00574
1.63333	-0.00523
1.66667	-0.00565
1.7	-0.00567
1.73333	-0.00422
1.76667	-0.00449
1.8	-0.00475
1.83333	-0.00493
1.86667	-0.00498
1.9	-0.00536
1.93333	-0.00705
1.96667	-0.00774
2	-0.00708
2.03333	-0.00811
2.06667	-0.00836
2.1	-0.00762
2.13333	-0.00677
2.16667	-0.00693
2.2	-0.00658
2.23333	-0.00665
2.26667	-0.00669
2.3	-0.00586
2.33333	-0.00538
2.36667	-0.00532
2.4	-0.0047
2.43333	-0.0033
2.46667	-0.00393
2.5	-0.00283
2.53333	-0.00263
2.56667	-0.00298
2.6	-0.00418
2.63333	-0.00403
2.66667	-0.00514
2.7	-0.00475
2.73333	-0.0038
2.76667	-0.00402
2.8	-0.00493
2.83333	-0.00565
2.86667	-0.00486
2.9	-0.00516
2.93333	-0.00433
2.96667	-0.004
3	-0.00515
3.03333	-0.00542
3.06667	-0.00486
3.1	-0.00476
3.13333	-0.00379
3.16667	-0.0041
3.2	-0.00307
3.23333	-0.00355
3.26667	-0.00412
3.3	-0.00414
3.33333	-0.00256
3.36667	-0.00281
3.4	-0.0037
3.43333	-0.00462
3.46667	-0.0038
3.5	-0.00281
3.53333	-0.00288
3.56667	-0.00397
3.6	-0.00313
3.63333	-0.00285
3.66667	-0.00202
3.7	-0.00169
3.73333	-0.0022
3.76667	-0.00336
3.8	-0.00279
3.83333	-0.00227
3.86667	-0.00331
3.9	-0.00334
3.93333	-0.00274
3.96667	-0.00163
4	-0.000235535
4.03333	-0.00036029
4.06667	-0.000232044
4.1	0.000380201
4.13333	-0.000248553
4.16667	0.000722692
4.2	0.00202
4.23333	0.00276
4.26667	0.00265
4.3	0.00248
4.33333	0.00219
4.36667	0.00115
4.4	0.00084141
4.43333	0.00177
4.46667	0.00229
4.5	0.00214
4.53333	0.00162
4.56667	0.00287
4.6	0.00406
4.63333	0.00361
4.66667	0.00357
4.7	0.00522
4.73333	0.00729
4.76667	0.0057
4.8	0.00511
4.83333	0.00457
4.86667	0.00501
4.9	0.00582
4.93333	0.00416
4.96667	0.00269
5	0.00206
5.03333	0.00207
5.06667	0.00126
5.1	-0.000115436
5.13333	-0.00044719
5.16667	-0.00116
5.2	-0.00305
5.23333	-0.00368
5.26667	-0.00372
5.3	-0.00249
5.33333	-0.00316
5.36667	-0.00543
5.4	-0.00484
5.43333	-0.00422
5.46667	-0.00438
5.5	-0.00389
5.53333	-0.0022
5.56667	-0.00264
5.6	-0.00268
5.63333	-0.0029
5.66667	-0.00276
5.7	-0.00287
5.73333	-0.00253
5.76667	-0.00187
5.8	-0.000840282
5.83333	-0.00204
5.86667	-0.00253
5.9	-0.00207
5.93333	-0.0002053
5.96667	0.000310945
6	0.000163191
6.03333	-0.000405564
6.06667	-0.00225
6.1	-0.00594
6.13333	-0.0235
6.16667	-0.0561
6.2	-0.0801
6.23333	-0.09488
6.26667	-0.1053
6.3	-0.11026
6.33333	-0.1062
6.36667	-0.10036
6.4	-0.0934
6.43333	-0.08652
6.46667	-0.08057
6.5	-0.0737
6.53333	-0.06581
6.56667	-0.06124
6.6	-0.05658
6.63333	-0.052
6.66667	-0.04593
6.7	-0.04341
6.73333	-0.04116
6.76667	-0.03819
6.8	-0.03479
6.83333	-0.0327
6.86667	-0.03033
6.9	-0.02888
6.93333	-0.02788
6.96667	-0.02655
7	-0.02488
7.03333	-0.02425
7.06667	-0.02549
7.1	-0.0256
7.13333	-0.02683
7.16667	-0.0292
7.2	-0.03102
7.23333	-0.03176
7.26667	-0.03185
7.3	-0.03183
7.33333	-0.03188
7.36667	-0.03126
7.4	-0.03019
7.43333	-0.02901
7.46667	-0.02725
7.5	-0.02538
7.53333	-0.02457
7.56667	-0.02341
7.6	-0.02243
7.63333	-0.02148
7.66667	-0.02034
7.7	-0.01814
7.73333	-0.0174
7.76667	-0.01611
7.8	-0.01514
7.83333	-0.01451
7.86667	-0.01359
7.9	-0.01349
7.93333	-0.01511
7.96667	-0.01665
8	-0.01797
8.03333	-0.02035
8.06667	-0.02209
8.1	-0.02066
8.13333	-0.01973
8.16667	-0.02312
8.2	-0.02557
8.23333	-0.02592
8.26667	-0.02699
8.3	-0.02631
8.33333	-0.02546
8.36667	-0.02608
8.4	-0.0255
8.43333	-0.02397
8.46667	-0.02286
8.5	-0.02118
8.53333	-0.02079
8.56667	-0.02169
8.6	-0.02175
8.63333	-0.02112
8.66667	-0.02038
8.7	-0.01767
8.73333	-0.01669
8.76667	-0.01651
8.8	-0.0159
8.83333	-0.01566
8.86667	-0.01501
8.9	-0.01322
8.93333	-0.01037
8.96667	-0.00902
9	-0.00695
9.03333	-0.00467
9.06667	-0.00401
9.1	-0.00366
9.13333	-0.00384
9.16667	-0.00511
9.2	-0.00564
9.23333	-0.00771
9.26667	-0.00818
9.3	-0.00856
9.33333	-0.00989
9.36667	-0.01126
9.4	-0.01128
9.43333	-0.01129
9.46667	-0.01129
9.5	-0.01089
9.53333	-0.01003
9.56667	-0.01111
9.6	-0.01291
9.63333	-0.01322
9.66667	-0.00981
9.7	-0.00777
9.73333	-0.00687
9.76667	-0.00584
9.8	-0.00573
9.83333	-0.00657
9.86667	-0.00619
9.9	-0.00706
9.93333	-0.007
9.96667	-0.00674
10	-0.00724
10.0333	-0.00648
10.0667	-0.00569
10.1	-0.00714
10.1333	-0.0082
10.1667	-0.01179
10.2	-0.01447
10.2333	-0.01734
10.2667	-0.01796
10.3	-0.01532
10.3333	-0.01129
10.3667	-0.00789
10.4	-0.00412
10.4333	0.000750755
10.4667	0.00308
10.5	0.00593
10.5333	0.00652
10.5667	0.00549
10.6	0.00752
10.6333	0.00761
10.6667	0.00834
10.7	0.00867
10.7333	0.00863
10.7667	0.00906
10.8	0.00976
10.8333	0.01126
10.8667	0.01231
10.9	0.01161
10.9333	0.01001
10.9667	0.00916
11	0.01043
11.0333	0.01363
11.0667	0.01363
11.1	0.01342
11.1333	0.01258
11.1667	0.01293
11.2	0.01392
11.2333	0.01292
11.2667	0.01056
11.3	0.0092
11.3333	0.00917
11.3667	0.00872
11.4	0.00665
11.4333	0.00425
11.4667	0.00458
11.5	0.00427
11.5333	0.00317
11.5667	0.00331
11.6	0.00193
11.6333	0.000398149
11.6667	-0.000119996
11.7	0.000101859
11.7333	-0.00172
11.7667	-0.00366
11.8	-0.00349
11.8333	-0.00389
11.8667	-0.00559
11.9	-0.00976
11.9333	-0.0137
11.9667	-0.01442
12	-0.01544
12.0333	-0.01516
12.0667	-0.01712
12.1	-0.04771
12.1333	-0.19668
12.1667	-0.42339
12.2	-0.66361
12.2333	-0.89633
12.2667	-1.1034
12.3	-1.28388
12.3333	-1.44121
12.3667	-1.56927
12.4	-1.66253
12.4333	-1.70557
12.4667	-1.68111
12.5	-1.61888
12.5333	-1.52031
12.5667	-1.40245
12.6	-1.27607
12.6333	-1.15251
12.6667	-1.03461
12.7	-0.92385
12.7333	-0.82177
12.7667	-0.72842
12.8	-0.64708
12.8333	-0.57431
12.8667	-0.5087
12.9	-0.4507
12.9333	-0.4006
12.9667	-0.35646
13	-0.31645
13.0333	-0.28248
13.0667	-0.25146
13.1	-0.22263
13.1333	-0.19773
13.1667	-0.17624
13.2	-0.15903
13.2333	-0.14329
13.2667	-0.12847
13.3	-0.11512
13.3333	-0.10255
13.3667	-0.09183
13.4	-0.08192
13.4333	-0.07263
13.4667	-0.06348
13.5	-0.05479
13.5333	-0.04705
13.5667	-0.03848
13.6	-0.03207
13.6333	-0.02726
13.6667	-0.02401
13.7	-0.02059
13.7333	-0.01711
13.7667	-0.01426
13.8	-0.01047
13.8333	-0.00808
13.8667	-0.00496
13.9	-0.00183
13.9333	0.00161
13.9667	0.0043
14	0.00726
14.0333	0.01023
14.0667	0.0142
14.1	0.01795
14.1333	0.02057
14.1667	0.02256
14.2	0.02524
14.2333	0.02746
14.2667	0.02675
14.3	0.02757
14.3333	0.02969
14.3667	0.03203
14.4	0.03473
14.4333	0.03696
14.4667	0.03856
14.5	0.03908
14.5333	0.04112
14.5667	0.04212
14.6	0.04407
14.6333	0.04491
14.6667	0.04642
14.7	0.04572
14.7333	0.04464
14.7667	0.04473
14.8	0.04384
14.8333	0.04458
14.8667	0.04412
14.9	0.04392
14.9333	0.04473
14.9667	0.04452
15	0.04279
15.0333	0.04307
15.0667	0.04295
15.1	0.04296
15.1333	0.04231
15.1667	0.04003
15.2	0.03919
15.2333	0.03914
15.2667	0.03907
15.3	0.03958
15.3333	0.03773
15.3667	0.03496
15.4	0.03245
15.4333	0.0334
15.4667	0.03283
15.5	0.03369
15.5333	0.03363
15.5667	0.03536
15.6	0.03751
15.6333	0.03921
15.6667	0.04171
15.7	0.04252
15.7333	0.04297
15.7667	0.04205
15.8	0.04088
15.8333	0.04161
15.8667	0.0407
15.9	0.03966
15.9333	0.03891
15.9667	0.03936
16	0.04094
16.0333	0.04353
16.0667	0.04441
16.1	0.0458
16.1333	0.04716
16.1667	0.04796
16.2	0.04898
16.2333	0.04996
16.2667	0.04867
16.3	0.04671
16.3333	0.04475
16.3667	0.04218
16.4	0.041
16.4333	0.03873
16.4667	0.03546
16.5	0.03158
16.5333	0.02808
16.5667	0.02691
16.6	0.02606
16.6333	0.0242
16.6667	0.02373
16.7	0.02192
16.7333	0.02068
16.7667	0.0197
16.8	0.01767
16.8333	0.01458
16.8667	0.01224
16.9	0.01093
16.9333	0.01062
16.9667	0.00929
17	0.00727
17.0333	0.00572
17.0667	0.00602
17.1	0.0054
17.1333	0.00216
17.1667	-0.000216797
17.2	-0.0019
17.2333	-0.00304
17.2667	-0.00363
17.3	-0.00291
17.3333	-0.00262
17.3667	-0.00342
17.4	-0.00469
17.4333	-0.00561
17.4667	-0.00563
17.5	-0.00273
17.5333	-0.000198291
17.5667	0.000939846
17.6	0.000785865
17.6333	0.000917967
17.6667	0.00146
17.7	0.00117
17.7333	-0.000960726
17.7667	-0.0027
17.8	-0.00195
17.8333	-0.0028
17.8667	-0.00372
17.9	-0.00461
17.9333	-0.00585
17.9667	-0.00527
18	-0.00534
18.0333	-0.0056
18.0667	-0.00994
18.1	-0.0425
18.1333	-0.14895
18.1667	-0.28522
18.2	-0.44537
18.2333	-0.61536
18.2667	-0.77693
18.3	-0.92093
18.3333	-1.03998
18.3667	-1.13975
18.4	-1.22083
18.4333	-1.26439
18.4667	-1.25633
18.5	-1.21102
18.5333	-1.13608
18.5667	-1.04436
18.6	-0.9462
18.6333	-0.84872
18.6667	-0.7543
18.7	-0.66792
18.7333	-0.59072
18.7667	-0.52158
18.8	-0.45833
18.8333	-0.40203
18.8667	-0.35288
18.9	-0.31012
18.9333	-0.2751
18.9667	-0.24383
19	-0.21631
19.0333	-0.19287
19.0667	-0.17307
19.1	-0.15447
19.1333	-0.13675
19.1667	-0.12188
19.2	-0.10954
19.2333	-0.09817
19.2667	-0.08888
19.3	-0.08008
19.3333	-0.07421
19.3667	-0.06697
19.4	-0.0613
19.4333	-0.05511
19.4667	-0.05
19.5	-0.04467
19.5333	-0.04077
19.5667	-0.03713
19.6	-0.03363
19.6333	-0.03076
19.6667	-0.02801
19.7	-0.02538
19.7333	-0.02144
19.7667	-0.01899
19.8	-0.01852
19.8333	-0.01808
19.8667	-0.01679
19.9	-0.01709
19.9333	-0.01635
19.9667	-0.0155
20	-0.01237
20.0333	-0.01094
20.0667	-0.00848
20.1	-0.00783
20.1333	-0.00787
20.1667	-0.00915
20.2	-0.01057
20.2333	-0.01069
20.2667	-0.0091
20.3	-0.00859
20.3333	-0.00672
20.3667	-0.00689
20.4	-0.00683
20.4333	-0.00629
20.4667	-0.00747
20.5	-0.00963
20.5333	-0.01044
20.5667	-0.01028
20.6	-0.01192
20.6333	-0.01471
20.6667	-0.01714
20.7	-0.018
20.7333	-0.01551
20.7667	-0.01352
20.8	-0.01058
20.8333	-0.00623
20.8667	-0.00423
20.9	-0.00368
20.9333	-0.0032
20.9667	-0.00349
21	-0.00171
21.0333	-0.00171
21.0667	-0.00267
21.1	-0.00403
21.1333	-0.00457
21.1667	-0.00384
21.2	-0.00309
21.2333	-0.00202
21.2667	0.000258031
21.3	0.00221
21.3333	0.00296
21.3667	0.00216
21.4	0.00287
21.4333	0.00326
21.4667	0.00192
21.5	0.00153
21.5333	0.00184
21.5667	0.00335
21.6	0.00469
21.6333	0.00503
21.6667	0.00537
21.7	0.00378
21.7333	0.00205
21.7667	0.001
21.8	0.000211477
21.8333	-0.00044887
21.8667	-0.00104
21.9	6.14358e-05
21.9333	0.000863089
21.9667	0.0011
22	0.00225
22.0333	0.00434
22.0667	0.00581
22.1	0.00555
22.1333	0.0053
22.1667	0.00514
22.2	0.00444
22.2333	0.00449
22.2667	0.00387
22.3	0.00201
22.3333	-0.000530077
22.3667	-0.00332
22.4	-0.00402
22.4333	-0.00589
22.4667	-0.00704
22.5	-0.00695
22.5333	-0.00652
22.5667	-0.00736
22.6	-0.00733
22.6333	-0.00569
22.6667	-0.00208
22.7	-0.000429895
22.7333	0.000125758
22.7667	-0.00053859
22.8	-9.89367e-05
22.8333	3.47162e-05
22.8667	-0.000674631
22.9	-0.000550978
22.9333	-0.000774325
22.9667	-0.0017
23	-0.000936019
23.0333	-0.000897367
23.0667	-0.00139
23.1	0.000574939
23.1333	0.0015
23.1667	0.00183
23.2	0.00208
23.2333	0.00278
23.2667	0.00315
23.3	0.00144
23.3333	0.00105
23.3667	0.00171
23.4	0.0018
23.4333	0.00149
23.4667	0.000275004
23.5	0.000989716
23.5333	0.000769428
23.5667	-0.00029586
23.6	-0.00122
23.6333	-0.000712437
23.6667	-0.000789725
23.7	5.99872e-05
23.7333	0.00218
23.7667	0.00219
23.8	0.000783123
23.8333	0.00119
23.8667	0.00113
23.9	0.00228
23.9333	0.00188
23.9667	0.00245
24	0.00282
24.0333	0.00334
24.0667	0.0027
24.1	-0.01894
24.1333	-0.08633
24.1667	-0.18128
24.2	-0.29804
24.2333	-0.42361
24.2667	-0.54625
24.3	-0.66116
24.3333	-0.7586
24.3667	-0.84012
24.4	-0.90534
24.4333	-0.94476
24.4667	-0.9468
24.5	-0.92072
24.5333	-0.86957
24.5667	-0.80258
24.6	-0.72979
24.6333	-0.6543
24.6667	-0.58056
24.7	-0.51111
24.7333	-0.45088
24.7667	-0.39668
24.8	-0.34883
24.8333	-0.30627
24.8667	-0.26975
24.9	-0.23617
24.9333	-0.20735
24.9667	-0.18537
25	-0.16475
25.0333	-0.14722
25.0667	-0.13225
25.1	-0.11808
25.1333	-0.10642
25.1667	-0.09606
25.2	-0.08606
25.2333	-0.07904
25.2667	-0.07173
25.3	-0.06553
25.3333	-0.05789
25.3667	-0.05396
25.4	-0.04889
25.4333	-0.04449
25.4667	-0.04158
25.5	-0.03786
25.5333	-0.03449
25.5667	-0.03155
25.6	-0.03034
25.6333	-0.02863
25.6667	-0.02603
25.7	-0.02463
25.7333	-0.02453
25.7667	-0.0253
25.8	-0.02502
25.8333	-0.02374
25.8667	-0.0214
25.9	-0.02138
25.9333	-0.02234
25.9667	-0.02267
26	-0.02245
26.0333	-0.02248
26.0667	-0.02017
26.1	-0.01869
26.1333	-0.01749
26.1667	-0.01613
26.2	-0.01668
26.2333	-0.01633
26.2667	-0.01496
26.3	-0.01327
26.3333	-0.01317
26.3667	-0.01195
26.4	-0.01045
26.4333	-0.01057
26.4667	-0.01035
26.5	-0.01025
26.5333	-0.0108
26.5667	-0.01128
26.6	-0.01234
26.6333	-0.01222
26.6667	-0.01022
26.7	-0.00775
26.7333	-0.00823
26.7667	-0.00815
26.8	-0.00689
26.8333	-0.00678
26.8667	-0.00812
26.9	-0.00996
26.9333	-0.01211
26.9667	-0.01161
27	-0.01034
27.0333	-0.0088
27.0667	-0.00877
27.1	-0.00919
27.1333	-0.00945
27.1667	-0.00767
27.2	-0.00639
27.2333	-0.00396
27.2667	-0.00387
27.3	-0.0048
27.3333	-0.00476
27.3667	-0.00339
27.4	-0.00159
27.4333	-0.00107
27.4667	-0.000713269
27.5	0.00104
27.5333	0.00287
27.5667	0.00247
27.6	0.000275065
27.6333	-0.00106
27.6667	-0.000830268
27.7	-0.00211
27.7333	-0.00338
27.7667	-0.00485
27.8	-0.0053
27.8333	-0.00481
27.8667	-0.00526
27.9	-0.00469
27.9333	-0.00432
27.9667	-0.00427
28	-0.00234
28.0333	-0.00155
28.0667	-0.000226267
28.1	0.00225
28.1333	0.00232
28.1667	0.00274
28.2	0.00357
28.2333	0.00293
28.2667	0.00244
28.3	0.000825067
28.3333	0.00166
28.3667	0.0035
28.4	0.0042
28.4333	0.0044
28.4667	0.00506
28.5	0.00545
28.5333	0.00484
28.5667	0.00259
28.6	0.000622069
28.6333	-0.000879598
28.6667	-0.00232
28.7	-0.00274
28.7333	-0.00333
28.7667	-0.00348
28.8	-0.00152
28.8333	-0.00192
28.8667	-0.0026
28.9	-0.00149
28.9333	-0.000825597
28.9667	-0.0015
29	-0.00117
29.0333	-0.000311596
29.0667	-4.42629e-05
29.1	0.00106
29.1333	0.00242
29.1667	0.00359
29.2	0.00328
29.2333	0.00247
29.2667	0.00294
29.3	0.00195
29.3333	-0.00028118
29.3667	-0.00192
29.4	-0.000975989
29.4333	0.000125606
29.4667	-0.00172
29.5	-0.00119
29.5333	4.53924e-05
29.5667	-0.000238012
29.6	-0.00179
29.6333	-0.000813821
29.6667	-0.000344226
29.7	0.000374369
29.7333	-0.00101
29.7667	-0.002
29.8	-0.00145
29.8333	-0.00231
29.8667	-0.00199
29.9	-0.00161
29.9333	-0.00118
29.9667	-0.00137
30	-0.00136
30.0333	-0.00108
30.0667	-0.00164
30.1	-0.01604
30.1333	-0.06319
30.1667	-0.1341
30.2	-0.22276
30.2333	-0.32013
30.2667	-0.41366
30.3	-0.50083
30.3333	-0.57966
30.3667	-0.64726
30.4	-0.70164
30.4333	-0.7326
30.4667	-0.73408
30.5	-0.71331
30.5333	-0.67095
30.5667	-0.61506
30.6	-0.55654
30.6333	-0.49794
30.6667	-0.44038
30.7	-0.38541
30.7333	-0.33585
30.7667	-0.29282
30.8	-0.25344
30.8333	-0.2187
30.8667	-0.18854
30.9	-0.16361
30.9333	-0.14209
30.9667	-0.12393
31	-0.11065
31.0333	-0.09768
31.0667	-0.08508
31.1	-0.07604
31.1333	-0.06738
31.1667	-0.0601
31.2	-0.05354
31.2333	-0.04742
31.2667	-0.04221
31.3	-0.03669
31.3333	-0.03577
31.3667	-0.03226
31.4	-0.02871
31.4333	-0.02534
31.4667	-0.02404
31.5	-0.02021
31.5333	-0.01766
31.5667	-0.01703
31.6	-0.01756
31.6333	-0.01695
31.6667	-0.01554
31.7	-0.01567
31.7333	-0.01557
31.7667	-0.01602
31.8	-0.01568
31.8333	-0.01461
31.8667	-0.0132
31.9	-0.01118
31.9333	-0.00878
31.9667	-0.00696
32	-0.00699
32.0333	-0.00516
32.0667	-0.00375
32.1	-0.00291
32.1333	-0.00181
32.1667	-0.0038
32.2	-0.00451
32.2333	-0.00537
32.2667	-0.00531
32.3	-0.0065
32.3333	-0.00866
32.3667	-0.00937
32.4	-0.00879
32.4333	-0.00823
32.4667	-0.00711
32.5	-0.00699
32.5333	-0.00724
32.5667	-0.00428
32.6	-0.00244
32.6333	-0.000889631
32.6667	-0.000572033
32.7	-0.000622436
32.7333	-0.00311
32.7667	-0.00523
32.8	-0.00564
32.8333	-0.00713
32.8667	-0.01042
32.9	-0.01252
32.9333	-0.01458
32.9667	-0.01561
33	-0.01591
33.0333	-0.01466
33.0667	-0.01292
33.1	-0.01076
33.1333	-0.00912
33.1667	-0.00851
33.2	-0.00851
33.2333	-0.00719
33.2667	-0.00561
33.3	-0.00422
33.3333	-0.00321
33.3667	-0.00292
33.4	-0.00252
33.4333	-0.00212
33.4667	-0.00171
33.5	-0.00115
33.5333	-0.000255494
33.5667	1.10321e-06
33.6	0.00107
33.6333	0.00135
33.6667	0.00153
33.7	0.00246
33.7333	0.00318
33.7667	0.00458
33.8	0.00462
33.8333	0.00594
33.8667	0.00732
33.9	0.00793
33.9333	0.00746
33.9667	0.00795
34	0.00928
34.0333	0.00792
34.0667	0.00679
34.1	0.0077
34.1333	0.00895
34.1667	0.00923
34.2	0.00955
34.2333	0.01174
34.2667	0.01154
34.3	0.00909
34.3333	0.00812
34.3667	0.00735
34.4	0.00669
34.4333	0.00554
34.4667	0.0033
34.5	0.00155
34.5333	0.00179
34.5667	0.00268
34.6	0.00168
34.6333	0.00143
34.6667	0.002
34.7	0.00164
34.7333	0.00114
34.7667	0.00153
34.8	0.000671216
34.8333	0.000663814
34.8667	0.000433411
34.9	0.000418009
34.9333	0.000446607
34.9667	-0.00126
35	-0.00198
35.0333	-0.00297
35.0667	-0.00451
35.1	-0.00417
35.1333	-0.00248
35.1667	-0.00205
35.2	-0.00382
35.2333	-0.00184
35.2667	-0.000332352
35.3	0.000992504
35.3333	0.00096536
35.3667	0.00204
35.4	0.0031
35.4333	0.00198
35.4667	0.00222
35.5	0.00165
35.5333	-1.15038e-05
35.5667	-0.00106
35.6	-0.00225
35.6333	-0.00285
35.6667	-7.97759e-08
35.7	0.0015
35.7333	0.00201
35.7667	0.00135
35.8	0.00163
35.8333	0.0003122
35.8667	-0.000167916
35.9	-0.00136
35.9333	-0.00183
35.9667	-0.00212
36	-0.00099922
36.0333	0.000162954
36.0667	-0.00212
36.1	-0.01244
36.1333	-0.04846
36.1667	-0.10357
36.2	-0.17019
36.2333	-0.24178
36.2667	-0.29596
36.3	-0.34219
36.3333	-0.40181
36.3667	-0.46536
36.4	-0.52161
36.4333	-0.55789
36.4667	-0.56478
36.5	-0.55019
36.5333	-0.51961
36.5667	-0.47536
36.6	-0.42759
36.6333	-0.38037
36.6667	-0.33439
36.7	-0.29163
36.7333	-0.25472
36.7667	-0.22349
36.8	-0.19376
36.8333	-0.16826
36.8667	-0.14586
36.9	-0.12636
36.9333	-0.10941
36.9667	-0.09539
37	-0.08518
37.0333	-0.07516
37.0667	-0.0678
37.1	-0.06294
37.1333	-0.05747
37.1667	-0.05383
37.2	-0.04873
37.2333	-0.04559
37.2667	-0.04248
37.3	-0.0395
37.3333	-0.03805
37.3667	-0.03445
37.4	-0.031
37.4333	-0.02816
37.4667	-0.02482
37.5	-0.02159
37.5333	-0.01827
37.5667	-0.01639
37.6	-0.01512
37.6333	-0.01212
37.6667	-0.01031
37.7	-0.00742
37.7333	-0.00639
37.7667	-0.00622
37.8	-0.00625
37.8333	-0.00416
37.8667	-0.00277
37.9	-0.00122
37.9333	0.00037524
37.9667	0.00152
38	0.00204
38.0333	0.00114
38.0667	0.000813512
38.1	0.00087008
38.1333	0.000708648
38.1667	0.00224
38.2	0.00369
38.2333	0.00451
38.2667	0.00418
38.3	0.00513
38.3333	0.00613
38.3667	0.00466
38.4	0.00386
38.4333	0.00383
38.4667	0.00352
38.5	0.00567
38.5333	0.0053
38.5667	0.00551
38.6	0.00576
38.6333	0.00525
38.6667	0.00569
38.7	0.005
38.7333	0.00511
38.7667	0.00594
38.8	0.0047
38.8333	0.00521
38.8667	0.00506
38.9	0.00427
38.9333	0.00536
38.9667	0.0049
39	0.00577
39.0333	0.0054
39.0667	0.00486
39.1	0.00504
39.1333	0.00498
39.1667	0.0038
39.2	0.00314
39.2333	0.00372
39.2667	0.00435
39.3	0.0067
39.3333	0.00798
39.3667	0.00991
39.4	0.01032
39.4333	0.01035
39.4667	0.01056
39.5	0.01189
39.5333	0.0128
39.5667	0.01273
39.6	0.01165
39.6333	0.01125
39.6667	0.00966
39.7	0.00778
39.7333	0.00775
39.7667	0.00654
39.8	0.00615
39.8333	0.00571
39.8667	0.00586
39.9	0.0063
39.9333	0.00615
39.9667	0.00677
40	0.0068
40.0333	0.00826
40.0667	0.00824
40.1	0.00923
40.1333	0.01012
40.1667	0.00897
40.2	0.00798
40.2333	0.0074
40.2667	0.00761
40.3	0.00729
40.3333	0.00583
40.3667	0.00432
40.4	0.00416
40.4333	0.00312
40.4667	0.00221
40.5	0.00369
40.5333	0.00487
40.5667	0.00649
40.6	0.00601
40.6333	0.0058
40.6667	0.00595
40.7	0.00513
40.7333	0.0049
40.7667	0.00502
40.8	0.00606
40.8333	0.00474
40.8667	0.00459
40.9	0.00514
40.9333	0.00581
40.9667	0.00684
41	0.0062
41.0333	0.00724
41.0667	0.00644
41.1	0.00562
41.1333	0.00386
41.1667	0.0036
41.2	0.00214
41.2333	0.00173
41.2667	0.000227618
41.3	1.23924e-07
41.3333	-0.00054737
41.3667	-0.00149
41.4	-0.000350358
41.4333	0.000488149
41.4667	0.000331655
41.5	-6.83921e-06
41.5333	-1.53331e-05
41.5667	-9.82692e-06
41.6	0.000739679
41.6333	0.000360185
41.6667	-0.000753308
41.7	4.11977e-05
41.7333	0.00127
41.7667	0.000306821
41.8	-0.000302384
41.8333	0.000801411
41.8667	0.000543205
41.9	0.00112
41.9333	0.00233
41.9667	0.00101
42	0.000137385
42.0333	-0.00098882
42.0667	-0.00396
42.1	-0.02122
42.1333	-0.05882
42.1667	-0.10647
42.2	-0.16343
42.2333	-0.22696
42.2667	-0.28809
42.3	-0.34459
42.3333	-0.39834
42.3667	-0.44158
42.4	-0.47284
42.4333	-0.48984
42.4667	-0.48616
42.5	-0.4679
42.5333	-0.43717
42.5667	-0.39903
42.6	-0.35855
42.6333	-0.31952
42.6667	-0.28221
42.7	-0.24952
42.7333	-0.22116
42.7667	-0.19361
42.8	-0.16825
42.8333	-0.14721
42.8667	-0.12869
42.9	-0.11277
42.9333	-0.09817
42.9667	-0.08605
43	-0.07453
43.0333	-0.06519
43.0667	-0.05831
43.1	-0.05348
43.1333	-0.049
43.1667	-0.04455
43.2	-0.04013
43.2333	-0.03563
43.2667	-0.03062
43.3	-0.02755
43.3333	-0.02782
43.3667	-0.02779
43.4	-0.02485
43.4333	-0.02118
43.4667	-0.01995
43.5	-0.01818
43.5333	-0.01761
43.5667	-0.01638
43.6	-0.01635
43.6333	-0.01591
43.6667	-0.01326
43.7	-0.01039
43.7333	-0.00849
43.7667	-0.0076
43.8	-0.0063
43.8333	-0.0044
43.8667	-0.00498
43.9	-0.00506
43.9333	-0.00449
43.9667	-0.00271
44	-0.000949655
44.0333	0.00042617
44.0667	0.000883995
44.1	-0.00048218
44.1333	-0.000849355
44.1667	-0.00148
44.2	-0.00131
44.2333	-0.00135
44.2667	-0.00181
44.3	-0.00256
44.3333	-0.00191
44.3667	-0.00272
44.4	-0.00335
44.4333	-0.00342
44.4667	-0.00389
44.5	-0.00374
44.5333	-0.00236
44.5667	-0.00108
44.6	-0.000694804
44.6333	0.000496021
44.6667	0.00123
44.7	0.00148
44.7333	0.000834497
44.7667	5.23216e-05
44.8	7.51466e-05
44.8333	0.00174
44.8667	0.000823797
44.9	-0.000623378
44.9333	-0.00162
44.9667	-0.00308
45	-0.00315
45.0333	-0.00261
45.0667	-0.00346
45.1	-0.00195
45.1333	-0.00214
45.1667	-0.00348
45.2	-0.00402
45.2333	-0.00319
45.2667	-0.00304
45.3	-0.00336
45.3333	-0.00255
45.3667	-0.00188
45.4	-0.00127
45.4333	-0.00244
45.4667	-0.00299
45.5	-0.00368
45.5333	-0.00518
45.5667	-0.00631
45.6	-0.00498
45.6333	-0.00535
45.6667	-0.0056
45.7	-0.00477
45.7333	-0.00431
45.7667	-0.00521
45.8	-0.00646
45.8333	-0.0055
45.8667	-0.00509
45.9	-0.00655
45.9333	-0.00558
45.9667	-0.00546
46	-0.00461
46.0333	-0.00455
46.0667	-0.00363
46.1	-0.0019
46.1333	-0.000840851
46.1667	-0.00197
46.2	-0.00343
46.2333	-0.00343
46.2667	-0.00301
46.3	-0.00431
46.3333	-0.00451
46.3667	-0.00486
46.4	-0.00472
46.4333	-0.00455
46.4667	-0.00544
46.5	-0.0064
46.5333	-0.00712
46.5667	-0.00571
46.6	-0.00539
46.6333	-0.00532
46.6667	-0.00444
46.7	-0.0047
46.7333	-0.00532
46.7667	-0.00441
46.8	-0.00554
46.8333	-0.00676
46.8667	-0.00714
46.9	-0.00864
46.9333	-0.01084
46.9667	-0.00937
47	-0.00804
47.0333	-0.00797
47.0667	-0.00709
47.1	-0.00657
47.1333	-0.00512
47.1667	-0.00521
47.2	-0.00427
47.2333	-0.00188
47.2667	-0.000717602
47.3	-0.00121
47.3333	-0.000386232
47.3667	0.00204
47.4	0.00165
47.4333	0.00276
47.4667	0.00428
47.5	0.00345
47.5333	0.00337
47.5667	0.00286
47.6	0.0019
47.6333	-0.000254001
47.6667	-0.0016
47.7	-0.00279
47.7333	-0.00415
47.7667	-0.00364
47.8	-0.00264
47.8333	-0.00313
47.8667	-0.00204
47.9	-0.00211
47.9333	-0.00266
47.9667	-0.00241
48	-0.00307
48.0333	-0.0028
48.0667	-0.00389
48.1	-0.01509
48.1333	-0.04514
48.1667	-0.08793
48.2	-0.14082
48.2333	-0.19865
48.2667	-0.25477
48.3	-0.30846
48.3333	-0.35853
48.3667	-0.3772
48.4	-0.37722
48.4333	-0.37984
48.4667	-0.37445
48.5	-0.35968
48.5333	-0.33449
48.5667	-0.30251
48.6	-0.26918
48.6333	-0.23611
48.6667	-0.20476
48.7	-0.17754
48.7333	-0.15266
48.7667	-0.13134
48.8	-0.11135
48.8333	-0.09366
48.8667	-0.07922
48.9	-0.06634
48.9333	-0.05502
48.9667	-0.04597
49	-0.03867
49.0333	-0.03357
49.0667	-0.03033
49.1	-0.02638
49.1333	-0.0214
49.1667	-0.01782
49.2	-0.01421
49.2333	-0.01075
49.2667	-0.00833
49.3	-0.00591
49.3333	-0.00441
49.3667	-0.0057
49.4	-0.00706
49.4333	-0.00711
49.4667	-0.00625
49.5	-0.00461
49.5333	-0.00277
49.5667	-0.000854277
49.6	0.00208
49.6333	0.00462
49.6667	0.00718
49.7	0.00923
49.7333	0.01154
49.7667	0.01417
49.8	0.01617
49.8333	0.01753
49.8667	0.01941
49.9	0.0178
49.9333	0.01865
49.9667	0.01938
50	0.01931
50.0333	0.01976
50.0667	0.01872
50.1	0.0187
50.1333	0.01799
50.1667	0.01755
50.2	0.01849
50.2333	0.01854
50.2667	0.01741
50.3	0.01635
50.3333	0.01648
50.3667	0.01609
50.4	0.01493
50.4333	0.01442
50.4667	0.01425
50.5	0.01412
50.5333	0.01361
50.5667	0.01271
50.6	0.01338
50.6333	0.01257
50.6667	0.0121
50.7	0.01331
50.7333	0.0148
50.7667	0.01469
50.8	0.0152
50.8333	0.01576
50.8667	0.01678
50.9	0.01647
50.9333	0.01521
50.9667	0.01373
51	0.01365
51.0333	0.01355
51.0667	0.01302
51.1	0.01273
51.1333	0.01183
51.1667	0.01132
51.2	0.0114
51.2333	0.0118
51.2667	0.01147
51.3	0.01095
51.3333	0.01016
51.3667	0.01016
51.4	0.01009
51.4333	0.01056
51.4667	0.01072
51.5	0.01009
51.5333	0.00936
51.5667	0.0079
51.6	0.00605
51.6333	0.00598
51.6667	0.00559
51.7	0.00642
51.7333	0.00584
51.7667	0.00559
51.8	0.00723
51.8333	0.00707
51.8667	0.00819
51.9	0.00831
51.9333	0.00903
51.9667	0.0093
52	0.00908
52.0333	0.00822
52.0667	0.00604
52.1	0.00504
52.1333	0.00484
52.1667	0.0061
52.2	0.00647
52.2333	0.00436
52.2667	0.00393
52.3	0.00249
52.3333	0.00129
52.3667	-0.000558754
52.4	-0.00193
52.4333	-0.00314
52.4667	-0.00458
52.5	-0.00498
52.5333	-0.00575
52.5667	-0.00561
52.6	-0.00713
52.6333	-0.00748
52.6667	-0.00914
52.7	-0.00965
52.7333	-0.0081
52.7667	-0.00601
52.8	-0.00422
52.8333	-0.00393
52.8667	-0.0021
52.9	-5.49632e-05
52.9333	0.000389081
52.9667	0.0014
53	0.00172
53.0333	0.002
53.0667	0.00224
53.1	0.00169
53.1333	0.000756344
53.1667	0.000474387
53.2	0.000231431
53.2333	0.000987475
53.2667	0.0026
53.3	0.0035
53.3333	0.00311
53.3667	0.0038
53.4	0.00422
53.4333	0.00376
53.4667	0.00421
53.5	0.00388
53.5333	0.00333
53.5667	0.0029
53.6	0.000717781
53.6333	9.96842e-05
53.6667	0.000327588
53.7	0.000466491
53.7333	0.000923395
53.7667	0.00171
53.8	0.00129
53.8333	0.00179
53.8667	0.00264
53.9	0.000126912
53.9333	0.000523816
53.9667	0.00227
54	0.00181
54.0333	0.000369526
54.0667	-0.00399
54.1	-0.02375
54.1333	-0.08489
54.1667	-0.20719
54.2	-0.34325
54.2333	-0.44829
54.2667	-0.50896
54.3	-0.53432
54.3333	-0.53384
54.3667	-0.50498
54.4	-0.47118
54.4333	-0.44391
54.4667	-0.41161
54.5	-0.37592
54.5333	-0.33835
54.5667	-0.30065
54.6	-0.26456
54.6333	-0.23135
54.6667	-0.20215
54.7	-0.17587
54.7333	-0.15326
54.7667	-0.13414
54.8	-0.11618
54.8333	-0.10168
54.8667	-0.089
54.9	-0.07636
54.9333	-0.06756
54.9667	-0.0601
55	-0.05393
55.0333	-0.04882
55.0667	-0.0451
55.1	-0.04227
55.1333	-0.04036
55.1667	-0.03705
55.2	-0.03453
55.2333	-0.03333
55.2667	-0.0316
55.3	-0.0288
55.3333	-0.02668
55.3667	-0.02539
55.4	-0.02349
55.4333	-0.02293
55.4667	-0.0202
55.5	-0.01931
55.5333	-0.01959
55.5667	-0.01824
55.6	-0.01642
55.6333	-0.01605
55.6667	-0.01678
55.7	-0.01597
55.7333	-0.01426
55.7667	-0.01253
55.8	-0.01138
55.8333	-0.0104
55.8667	-0.00961
55.9	-0.00937
55.9333	-0.0103
55.9667	-0.01039
56	-0.01048
56.0333	-0.00997
56.0667	-0.01028
56.1	-0.00998
56.1333	-0.00817
56.1667	-0.00935
56.2	-0.01017
56.2333	-0.0092
56.2667	-0.00887
56.3	-0.00924
56.3333	-0.00936
56.3667	-0.01048
56.4	-0.0101
56.4333	-0.00715
56.4667	-0.00583
56.5	-0.00575
56.5333	-0.00526
56.5667	-0.00411
56.6	-0.00425
56.6333	-0.00292
56.6667	-0.00237
56.7	-0.0011
56.7333	0.00146
56.7667	0.000543829
56.8	0.000683965
56.8333	0.00321
56.8667	0.000897237
56.9	-0.000553627
56.9333	-0.000304491
56.9667	-0.000732355
57	-0.000952219
57.0333	-0.000571083
57.0667	-3.19468e-05
57.1	0.000601189
57.1333	0.00229
57.1667	0.00214
57.2	0.00203
57.2333	0.000966733
57.2667	0.00093887
57.3	0.00182
57.3333	0.00214
57.3667	0.00356
57.4	0.00264
57.4333	0.00215
57.4667	0.00179
57.5	0.00109
57.5333	0.000978958
57.5667	-0.000964906
57.6	-0.00149
57.6333	-0.00197
57.6667	-0.000832498
57.7	-0.00187
57.7333	-0.00374
57.7667	-0.00462
57.8	-0.00376
57.8333	-0.00249
57.8667	-0.00189
57.9	-0.00137
57.9333	-0.0037
57.9667	-0.00512
58	-0.00506
58.0333	-0.00456
58.0667	-0.00418
58.1	-0.00431
58.1333	-0.00436
58.1667	-0.00378
58.2	-0.00276
58.2333	-0.00306
58.2667	-0.00463
58.3	-0.00398
58.3333	-0.004
58.3667	-0.00433
58.4	-0.00397
58.4333	-0.00437
58.4667	-0.00474
58.5	-0.00506
58.5333	-0.00446
58.5667	-0.00465
58.6	-0.00462
58.6333	-0.00514
58.6667	-0.00541
58.7	-0.00593
58.7333	-0.00463
58.7667	-0.00478
58.8	-0.00616
58.8333	-0.00774
58.8667	-0.00838
58.9	-0.00818
58.9333	-0.00822
58.9667	-0.0076
59	-0.0075
59.0333	-0.00583
59.0667	-0.00505
59.1	-0.00507
59.1333	-0.00394
59.1667	-0.00234
59.2	-0.00298
59.2333	-0.00438
59.2667	-0.00455
59.3	-0.00473
59.3333	-0.00448
59.3667	-0.0035
59.4	-0.00331
59.4333	-0.00217
59.4667	-0.00262
59.5	-0.00349
59.5333	-0.00222
59.5667	-0.0023
59.6	-0.00333
59.6333	-0.00231
59.6667	-0.0035
59.7	-0.00381
59.7333	-0.0028
59.7667	-0.00329
59.8	-0.0022
59.8333	-0.00158
59.8667	-0.00163
59.9	-1.27269e-05
59.9333	0.000957663
59.9667	0.0012
60	0.000736295
60.0333	0.00258
60.0667	1.15311e-05
60.1	-0.01773
60.1333	-0.05336
60.1667	-0.09331
60.2	-0.13178
60.2333	-0.16723
60.2667	-0.20072
60.3	-0.23051
60.3333	-0.2574
60.3667	-0.27961
60.4	-0.29559
60.4333	-0.29947
60.4667	-0.28677
60.5	-0.26711
60.5333	-0.24331
60.5667	-0.21671
60.6	-0.19173
60.6333	-0.16764
60.6667	-0.14494
60.7	-0.12468
60.7333	-0.10727
60.7667	-0.09212
60.8	-0.08043
60.8333	-0.07185
60.8667	-0.06377
60.9	-0.05633
60.9333	-0.05043
60.9667	-0.04506
61	-0.03932
61.0333	-0.03675
61.0667	-0.03423
61.1	-0.0303
61.1333	-0.02742
61.1667	-0.02423
61.2	-0.02061
61.2333	-0.01851
61.2667	-0.01899
61.3	-0.01898
61.3333	-0.01809
61.3667	-0.01718
61.4	-0.0154
61.4333	-0.01542
61.4667	-0.01341
61.5	-0.01076
61.5333	-0.00989
61.5667	-0.00961
61.6	-0.00991
61.6333	-0.0097
61.6667	-0.01102
61.7	-0.01031
61.7333	-0.00951
61.7667	-0.00974
61.8	-0.00961
61.8333	-0.0096
61.8667	-0.01055
61.9	-0.0109
61.9333	-0.00911
61.9667	-0.00878
62	-0.00759
62.0333	-0.00516
62.0667	-0.00449
62.1	-0.00508
62.1333	-0.00626
62.1667	-0.00662
62.2	-0.00731
62.2333	-0.00664
62.2667	-0.0056
62.3	-0.00534
62.3333	-0.00461
62.3667	-0.00532
62.4	-0.00639
62.4333	-0.00648
62.4667	-0.00589
62.5	-0.00516
62.5333	-0.00318
62.5667	-0.00345
62.6	-0.00217
62.6333	-0.00152
62.6667	-0.00261
62.7	-0.00216
62.7333	-0.00103
62.7667	-0.000605985
62.8	0.00144
62.8333	0.000691403
62.8667	0.000304097
62.9	-0.000325209
62.9333	-0.0014
62.9667	-0.00016582
63	0.000511874
63.0333	0.000720568
63.0667	0.000284262
63.1	-0.000120044
63.1333	-0.00026535
63.1667	-0.0018
63.2	-0.00165
63.2333	-0.00133
63.2667	-0.000127573
63.3	-0.000902879
63.3333	-0.00144
63.3667	-0.00113
63.4	-0.00183
63.4333	-0.00166
63.4667	-0.000238408
63.5	-0.000418714
63.5333	-0.000245019
63.5667	-0.00128
63.6	-0.00141
63.6333	-0.000808937
63.6667	-0.00168
63.7	-0.0017
63.7333	-0.000951854
63.7667	-0.0014
63.8	-0.00107
63.8333	-0.00173
63.8667	-0.003
63.9	-0.00398
63.9333	-0.00366
63.9667	-0.00462
64	-0.00579
64.0333	-0.0057
64.0667	-0.00391
64.1	-0.00332
64.1333	-0.00218
64.1667	-0.00213
64.2	-0.00326
64.2333	-0.00293
64.2667	-0.00195
64.3	-0.000312053
64.3333	0.000530641
64.3667	0.00227
64.4	0.00304
64.4333	0.00291
64.4667	0.00316
64.5	0.00356
64.5333	0.00295
64.5667	0.00217
64.6	0.00215
64.6333	0.0024
64.6667	0.00294
64.7	0.00171
64.7333	0.00219
64.7667	0.00136
64.8	0.000189339
64.8333	0.000288492
64.8667	-0.000571355
64.9	-0.00161
64.9333	-0.00103
64.9667	-0.000699897
65	-0.0011
65.0333	-0.000314591
65.0667	-0.000935439
65.1	-0.00167
65.1333	-0.00268
65.1667	-0.00232
65.2	-0.00271
65.2333	-0.00136
65.2667	-0.00169
65.3	-0.000986306
65.3333	-0.000339084
65.3667	0.00122
65.4	-2.26403e-05
65.4333	-0.00225
65.4667	-0.00339
65.5	-0.00287
65.5333	-0.00147
65.5667	-0.00277
65.6	-0.00247
65.6333	-0.00231
65.6667	-0.00179
65.7	-0.000655644
65.7333	-0.00137
65.7667	-0.000634201
65.8	-0.000414979
65.8333	-0.000458757
65.8667	0.00134
65.9	0.00157
65.9333	0.00225
65.9667	0.00136
66	0.00221
66.0333	0.00166
66.0667	-2.79564e-05
66.1	-0.01668
66.1333	-0.0533
66.1667	-0.09198
66.2	-0.12652
66.2333	-0.15787
66.2667	-0.18687
66.3	-0.21326
66.3333	-0.23553
66.3667	-0.25458
66.4	-0.26733
66.4333	-0.26922
66.4667	-0.25726
66.5	-0.23748
66.5333	-0.21513
66.5667	-0.1904
66.6	-0.16708
66.6333	-0.14531
[truncated: 3,223 more rows]

## Sheet: Figure 4B
	F/F0	SD
Metronidazole	0.22842	0.02387
Analogue 1	0.76891	0.02345
Analogue 2	0.58455	0.00438
Analogue 3	0.55222	0.01784
Analogue 4	0.85001	0.00717
Analogue 5	0.74087	0.01338
Analogue 6	0.95583	0.00946
Acetaminophen	0.9141	0.00843
Chlorphenamine maleate	0.93862	0.000337
Dexamethasone	0.95088	0.0148
Diclofenac sodium	0.93479	0.00914
Diphenhydramine	0.93637	0.03633
Erythromycin	0.9425	0.00818
Ibuprofen	0.94999	0.01567
Meprednisone	0.93065	0.00536
Phenacetin	0.93067	0.00775
Phenylbutazone	0.92638	0.01
Piroxicam	0.98118	0.0063

## Sheet: Figure 5A, B, C
Concentration of Ibuprofen (μM)	IBF-1		IBF-1a		IBF-1		IBF-1a		IBF-1		IBF-1a
	Ibufenac				Flurbiprofen				Ketoprofen
	F/F0	SD	F/F0	SD	F/F0	SD	F/F0	SD	F/F0	SD	F/F0	SD
0	1	0	1	0	1	0	1	0	1	0	1	0
1	0.906275	0.0150942	0.99328	0.0202889	0.921501	0.0348933	0.970997	0.0105164	0.959571	0.0266063	0.977778	0.0344104
2	0.86453	0.0331582	0.964569	0.00820602	0.877057	0.0442139	0.941939	0.00780419	0.959364	0.0283665	0.943811	0.0142905
5	0.807088	0.0330401	0.932549	0.00331621	0.781799	0.032621	0.942451	0.000921589	0.937875	0.0295422	0.931883	0.0185463
10	0.777749	0.0127732	0.940011	0.00602536	0.714861	0.0451978	0.95498	0.00343232	0.910211	0.0188586	0.933677	0.0404429
20	0.697373	0.00431955	0.914723	0.000720705	0.638563	0.0362458	0.937117	0.0446303	0.829471	0.0466093	0.947289	0.042322
50	0.619165	0.00838229	0.904185	0.0116545	0.565182	0.0174501	0.934716	0.0484334	0.742906	0.0274703	0.963202	0.0554168
100	0.608145	0.0131753	0.898143	0.0118563	0.529658	0.0258173	0.955169	0.0384421	0.750456	0.0349761	0.968215	0.0700386

## Sheet: Figure 5D
	F/F0	SD
Ibuprofen	0.58346	0.01735
Acetaminophen	0.9541	0.01843
Chlorphenamine maleate	0.94862	0.0212
Dexamethasone	0.94088	0.0148
Diclofenac sodium	0.92379	0.02914
Diphenhydramine	0.92837	0.03633
Erythromycin	0.92425	0.00818
Meprednisone	0.92999	0.01967
Metronidazole	0.96065	0.02536
Phenacetin	0.92067	0.01775
Phenylbutazone	0.95638	0.01234
Piroxicam	0.91118	0.03063

## Sheet: Figure 6A
Wavelength	0 µM	0.5 µM	1µM	2 µM	3 µM	4 µM	5 µM	7.5 µM	10 µM	25µM	50 µM	75 µM	100 µM
451.96	11.4152	10.5796	11.2346	10.6182	11.6696	11.668	12.2708	13.9588	13.2846	15.824	15.7073	17.8107	19.0294
453.03	25.7	22.4612	21.9561	19.9233	19.6917	18.3	18.2143	18.7284	17.4021	17.9855	17.4127	19.1084	20.1467
453.93	39.9038	34.3065	32.6145	29.1778	27.6682	24.8948	24.1072	23.4633	21.4708	20.1271	19.0889	20.384	21.2432
455	54.0266	46.1153	43.21	38.3815	35.5992	31.4525	29.9494	28.1636	25.4906	22.2486	20.7358	21.6374	22.3188
456.06	68.0684	57.8878	53.7425	47.5345	43.4845	37.9731	35.7409	32.8293	29.4615	24.3502	22.3535	22.8687	23.3737
456.96	82.0292	69.6238	64.2119	56.6368	51.3243	44.4565	41.4818	37.4604	33.3835	26.4318	23.9421	24.0779	24.4078
458.03	95.9089	81.3234	74.6184	65.6884	59.1184	50.9028	47.172	42.057	37.2565	28.4934	25.5014	25.2648	25.421
458.93	109.708	92.9866	84.962	74.6893	66.867	57.312	52.8116	46.6189	41.0807	30.535	27.0315	26.4297	26.4135
460	123.425	104.613	95.2425	83.6394	74.57	63.684	58.4004	51.1462	44.856	32.5566	28.5325	27.5724	27.3851
461.04	137.062	116.204	105.46	92.5389	82.2275	70.0189	63.9387	55.6389	48.5824	34.5583	30.0042	28.6929	28.3359
461.94	150.618	127.758	115.615	101.388	89.8393	76.3167	69.4262	60.097	52.2598	36.54	31.4467	29.7913	29.2659
462.98	164.093	139.275	125.706	110.186	97.4055	82.5773	74.8631	64.5204	55.8884	38.5016	32.86	30.8675	30.1751
464.02	177.486	150.757	135.735	118.933	104.926	88.8008	80.2494	68.9093	59.4681	40.4433	34.2441	31.9216	31.0635
465.07	190.799	162.201	145.7	127.63	112.401	94.9871	85.585	73.2636	62.9988	42.365	35.599	32.9535	31.9311
465.97	204.031	173.61	155.603	136.275	119.831	101.136	90.8699	77.5833	66.4807	44.2668	36.9247	33.9633	32.7779
467.01	217.182	184.982	165.443	144.871	127.215	107.248	96.1041	81.8684	69.9137	46.1485	38.2212	34.951	33.6039
468.05	233.231	198.81	177.18	155.263	135.738	114.54	102.32	86.825	73.9127	48.2228	39.5999	36.1015	34.3594
468.95	248.79	212.349	188.706	165.791	144.275	121.84	108.224	91.7709	77.7247	50.2832	40.9911	37.1905	35.1402
470	264.071	225.681	199.898	175.854	152.758	129.124	114.023	96.5825	81.4787	52.3864	42.3632	38.2695	36.0308
471.04	278.844	238.873	210.92	185.434	161.144	136.063	119.957	101.348	85.1809	54.3867	43.7768	39.307	36.9197
471.94	292.72	251.724	221.662	194.567	169.276	142.713	125.499	105.996	88.7603	56.3366	45.041	40.2368	37.679
472.98	305.742	263.523	231.881	203.302	177.126	148.8	130.815	110.424	92.1404	58.1322	46.1966	41.0662	38.3209
474.02	318.097	274.188	241.377	211.194	184.484	154.254	135.895	114.45	95.4461	59.8303	47.2308	41.8352	38.8991
475.07	329.796	283.785	250.223	218.4	191.368	159.395	140.786	118.197	98.853	61.3768	48.1414	42.6389	39.4253
475.97	340.535	292.574	258.219	225.078	197.521	164.33	145.258	121.644	101.759	62.8444	49.024	43.4071	39.974
477.01	350.284	300.685	264.877	231.222	202.817	168.464	149.256	124.515	104.217	64.3055	50.0025	43.9938	40.6371
478.05	358.92	307.865	270.787	236.523	207.371	171.911	152.682	126.934	106.166	65.6826	50.8727	44.4132	41.2105
478.95	365.972	313.629	275.876	240.897	211.299	174.728	155.563	129.255	107.693	67.0295	51.4468	44.7721	41.6519
480	371.646	318.295	279.986	244.357	214.532	177.008	157.818	131.325	108.772	68.101	51.8992	45.136	42.0184
481.06	376.547	322.35	283.056	247.201	217.015	178.59	159.613	132.847	109.86	68.8479	52.1708	45.345	42.3509
481.96	381.027	325.518	285.534	249.492	218.826	180.17	161.235	133.818	110.86	69.3398	52.3319	45.3637	42.7272
483.03	384.009	327.415	287.163	250.848	219.856	181.208	162.52	134.386	111.685	69.6322	52.4034	45.3124	43.0448
483.93	385.451	328.065	288.143	251.481	220.268	181.73	163.281	134.562	112.07	69.6637	52.485	45.4053	43.3023
485	385.787	327.85	288.481	251.449	220.368	181.655	163.603	134.352	112.141	69.4785	52.5602	45.5639	43.3899
486.06	385.449	326.945	288.346	251.01	219.896	181.25	163.585	133.839	111.809	69.2535	52.5303	45.4565	43.4621
486.96	384.394	325.461	287.355	250.013	218.706	180.357	162.812	133.03	111.375	68.9399	52.4569	45.2068	43.405
488.03	382.789	323.161	285.69	248.638	217.295	179.277	161.583	132.103	110.678	68.5694	52.1785	44.9583	43.263
488.93	380.371	320.208	283.009	246.515	215.653	177.965	160.131	131.137	109.912	68.07	51.8078	44.7629	42.9956
490	377.024	316.948	279.927	243.656	213.533	176.26	158.606	129.981	108.928	67.5337	51.2677	44.4338	42.5975
491.04	372.842	313.133	276.508	240.674	210.864	174.205	156.856	128.646	107.739	67.0028	50.8989	44.0889	42.2955
491.94	368.219	308.858	272.881	237.693	207.925	171.759	154.791	127.027	106.273	66.3638	50.5752	43.6214	41.9228
492.98	362.95	304.061	268.974	234.726	204.697	169.248	152.475	125.306	104.874	65.4489	50.2489	43.0737	41.4601
494.02	357.322	299.332	264.636	231.277	201.156	166.488	150.12	123.226	103.435	64.3998	49.8132	42.5108	40.9321
495.07	351.843	294.535	259.845	227.693	197.411	163.817	147.422	120.994	101.789	63.4439	49.4048	42.0008	40.45
495.97	346.12	289.844	255.08	223.674	193.766	160.977	144.532	118.806	99.9564	62.4464	48.7941	41.5348	39.8804
497.01	340.028	284.941	250.414	219.717	190.328	158.397	141.486	116.836	98.0378	61.3766	48.2338	41.01	39.2071
498.05	333.328	279.83	245.404	215.676	187.01	155.963	138.467	114.851	96.1928	60.329	47.7244	40.4042	38.5069
498.95	326.522	274.816	240.252	211.753	183.771	153.521	135.659	112.826	94.3965	59.3893	47.2917	39.838	37.8312
500	319.293	270.147	235.272	207.527	180.885	150.83	133.178	110.763	92.9011	58.3759	46.7685	39.3946	37.4176
501.02	311.89	265.392	230.814	203.294	177.825	147.913	130.775	108.844	91.2882	57.4524	46.1909	38.9404	36.9928
502.05	304.557	260.042	226.238	199.249	174.653	144.927	128.248	106.934	89.4836	56.5713	45.4891	38.4531	36.4754
502.94	297.572	254.282	221.673	195.327	171.519	142.101	126.027	105.016	87.9261	55.6656	44.8298	38.0149	35.8955
503.97	291.096	249.245	217.395	191.541	168.259	139.456	123.732	103.176	86.4284	54.8489	44.2616	37.5722	35.5271
505	284.596	244.178	213.13	187.756	164.965	136.805	121.464	101.334	84.9498	54.0507	43.6863	37.135	35.1891
506.02	278.072	239.081	208.877	183.97	161.637	134.149	119.223	99.4901	83.4902	53.2712	43.1041	36.7034	34.8816
507.05	271.524	233.953	204.637	180.184	158.274	131.488	117.009	97.6435	82.0497	52.5102	42.5149	36.2774	34.6045
507.94	264.952	228.794	200.409	176.398	154.877	128.821	114.823	95.7946	80.6282	51.7677	41.9186	35.857	34.3578
508.97	258.355	223.606	196.194	172.612	151.445	126.149	112.663	93.9434	79.2258	51.0438	41.3154	35.4422	34.1416
510	251.735	218.387	191.992	168.826	147.979	123.472	110.531	92.0899	77.8425	50.3385	40.7051	35.033	33.9558
511.04	245.09	213.138	187.802	165.04	144.479	120.789	108.426	90.234	76.4782	49.6517	40.0879	34.6293	33.8004
511.94	238.421	207.858	183.625	161.254	140.944	118.1	106.348	88.3758	75.1329	48.9835	39.4636	34.2313	33.6755
512.98	231.728	202.548	179.46	157.468	137.375	115.407	104.298	86.5153	73.8067	48.3338	38.8323	33.8389	33.581
514.02	225.011	197.208	175.308	153.682	133.772	112.707	102.274	84.6525	72.4995	47.7027	38.1941	33.4521	33.5169
515.07	218.27	191.838	171.169	149.896	130.134	110.003	100.278	82.7874	71.2114	47.0902	37.5488	33.0709	33.4833
515.97	211.505	186.437	167.042	146.109	126.462	107.293	98.3092	80.9199	69.9424	46.4962	36.8966	32.6952	33.4801
517.01	204.715	181.006	162.927	142.323	122.755	104.577	96.3674	79.0502	68.6924	45.9208	36.2373	32.3252	33.5074
518.05	197.902	175.545	158.826	138.537	119.014	101.856	94.4527	77.1781	67.4614	45.3639	35.5711	31.9607	33.5651

## Sheet: Figure 6B
Concentration of Metronidazole (μM)	F/F0	SD
0	1	0
0.5	0.856456	0.00211827
1	0.75234	0.0205957
2	0.685783	0.0357622
3	0.580685	0.0224367
4	0.489504	0.0193115
5	0.423678	0.00120868
7.5	0.354661	0.00551535
10	0.290835	0.0115239
25	0.193295	0.0157231
50	0.145211	0.00256153
75	0.124585	0.00147173
100	0.11681	0.00243855

[truncated: 9 more sheets: Figure 6C, Figure 6D, Figure S3A, Figure S3B, Figure S3C, Figure S3D, Figure S4, Figure S6B, Figure S6C]
